# Supplementary material for: Generalized access to fluorinated β-keto amino compounds through asymmetric additions of α,α-difluoroenolates to CF3-sulfinylimine
Source: Royal Society of Chemistry journal article supplement (doi:10.1039/c4ob01575d), 2014-08-13

## Supporting Information

### Generalized access to fluorinated $\beta$ -keto amino compounds through asymmetric additions of $\alpha,\alpha$ -difluoroenolates to $\text{CF}_3$ -sulfinylimine

Chen Xie, Lingmin Wu, Haibo Mei, Vadim A. Soloshonok, Jianlin Han\* and Yi Pan

#### Page Number

1.  $^{19}\text{F}$ -NMR spectra of crude reaction mixture for optimization of the reaction conditions  
(Table 1).....S2
2. NMR spectra of compounds 10-13.....S12
3.  $^{19}\text{F}$  NMR spectra for the study of the configurational stability.....S49

**1.  $^{19}\text{F}$ -NMR spectra of crude reaction mixture for optimization of the reaction conditions  
(Table 1)**

$^{19}\text{F}$ -NMR spectra of crude reaction mixture for Entry 1 of Table 1

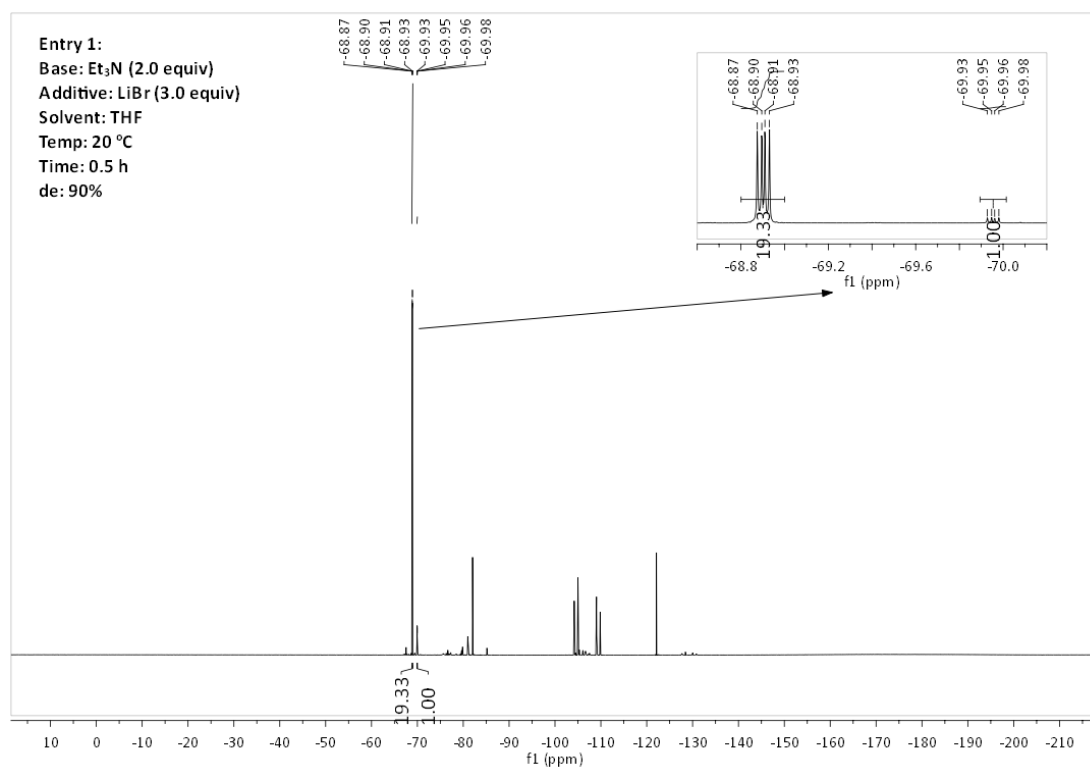

<sup>19</sup>F-NMR spectra of crude reaction mixture for Entry 2 of Table 1

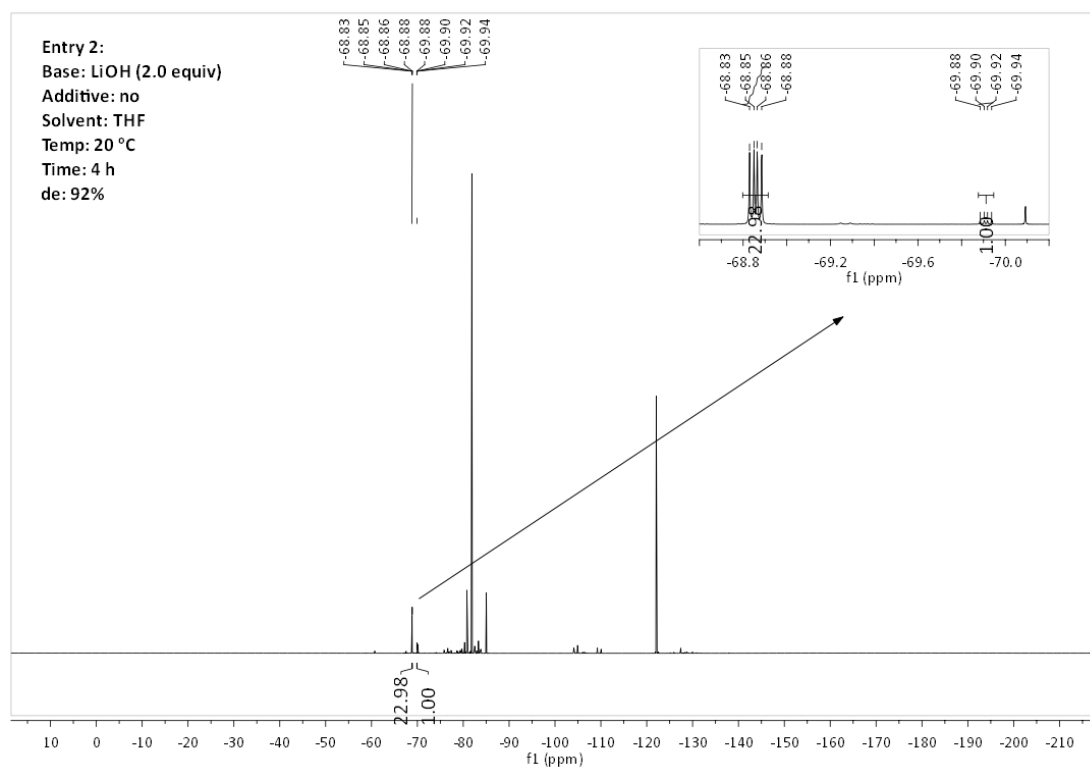

<sup>19</sup>F-NMR spectra of crude reaction mixture for Entry 3 of Table 1

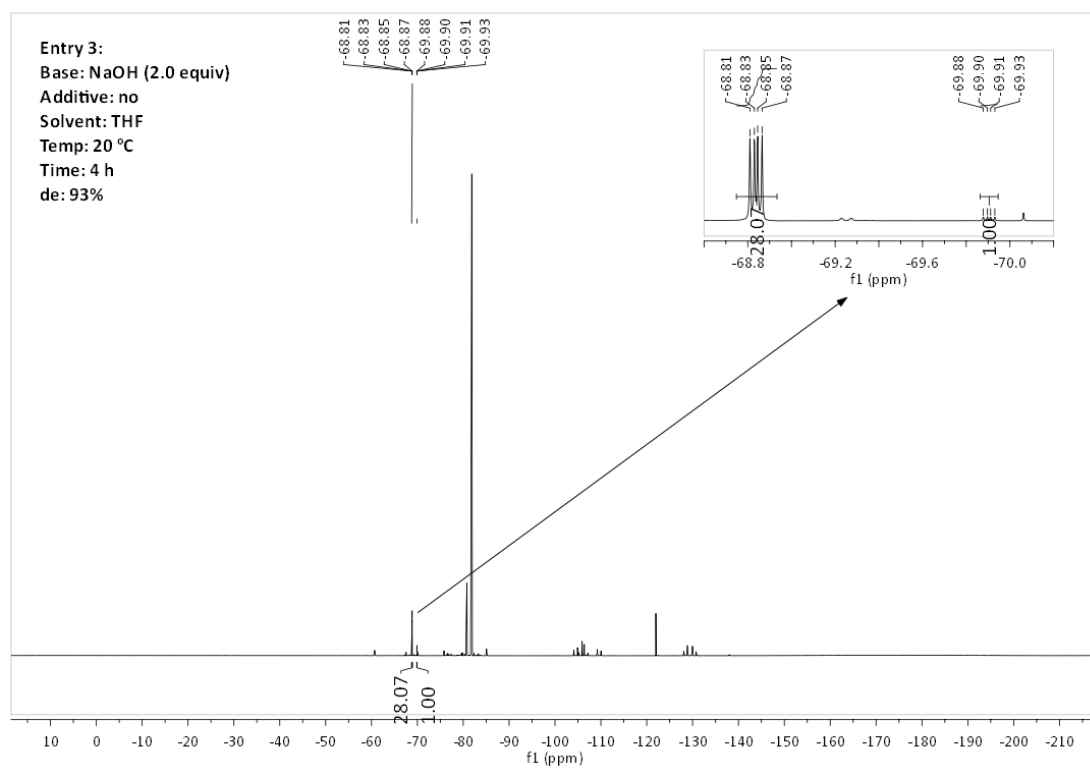

<sup>19</sup>F-NMR spectra of crude reaction mixture for Entry 4 of Table 1

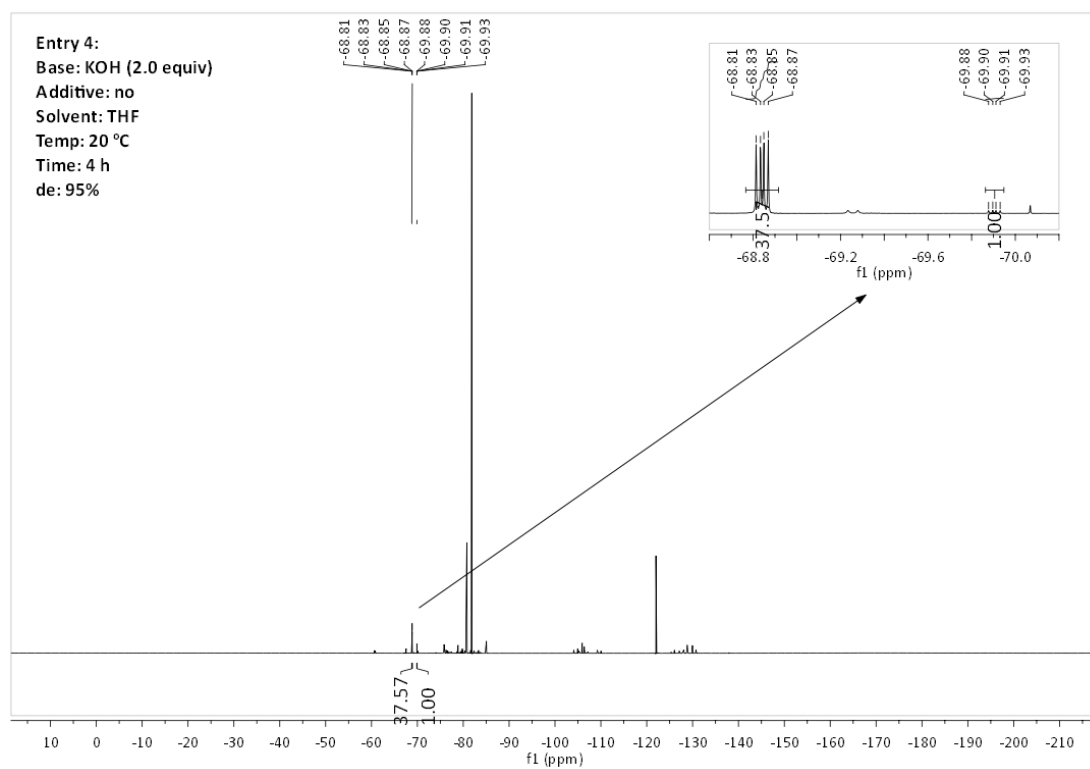

<sup>19</sup>F-NMR spectra of crude reaction mixture for Entry 5 of Table 1

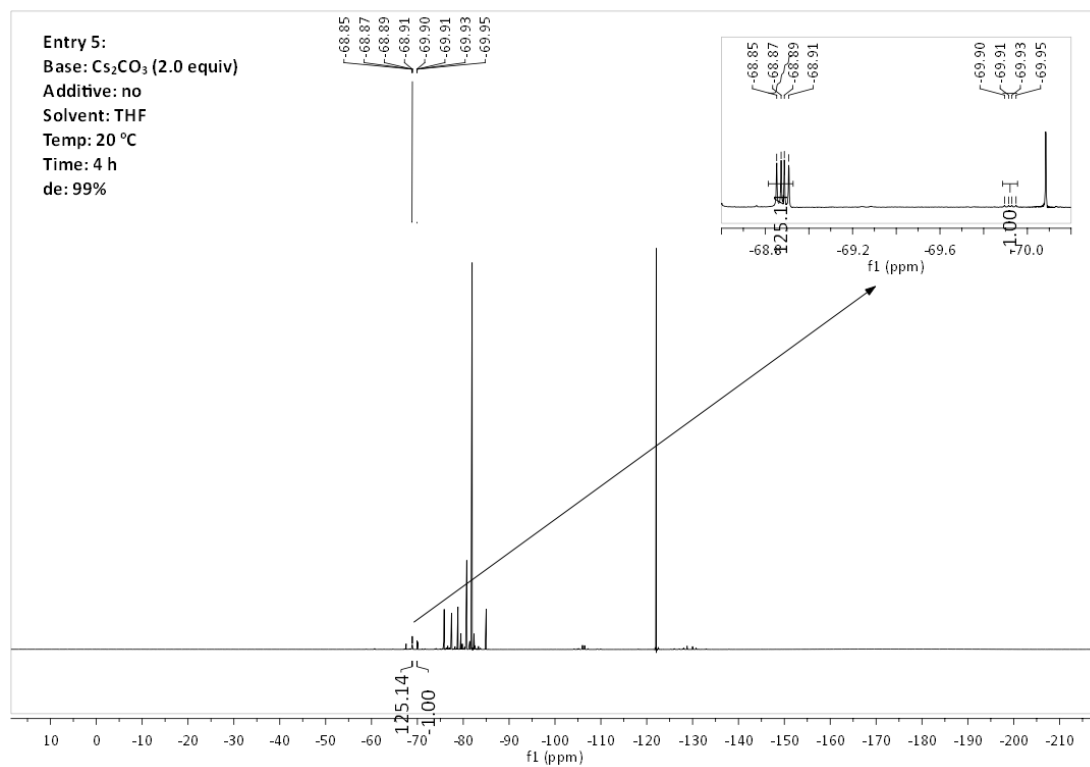

<sup>19</sup>F-NMR spectra of crude reaction mixture for Entry 6 of Table 1

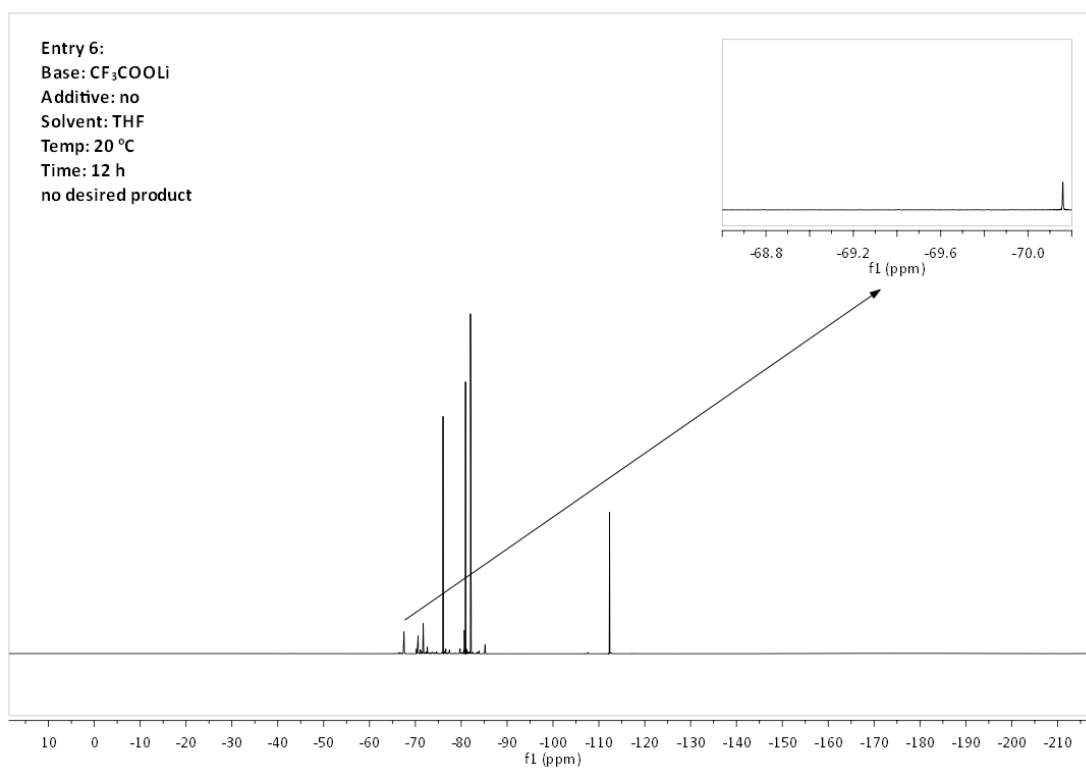

<sup>19</sup>F-NMR spectra of crude reaction mixture for Entry 7 of Table 1

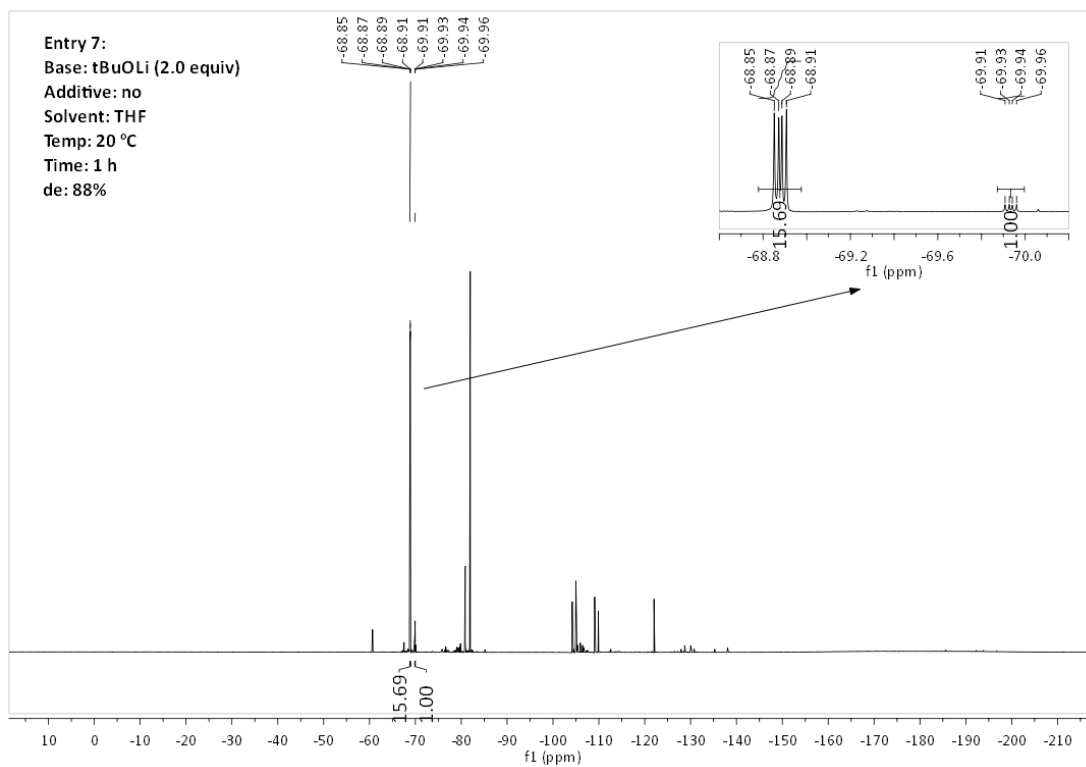

<sup>19</sup>F-NMR spectra of crude reaction mixture for Entry 8 of Table 1

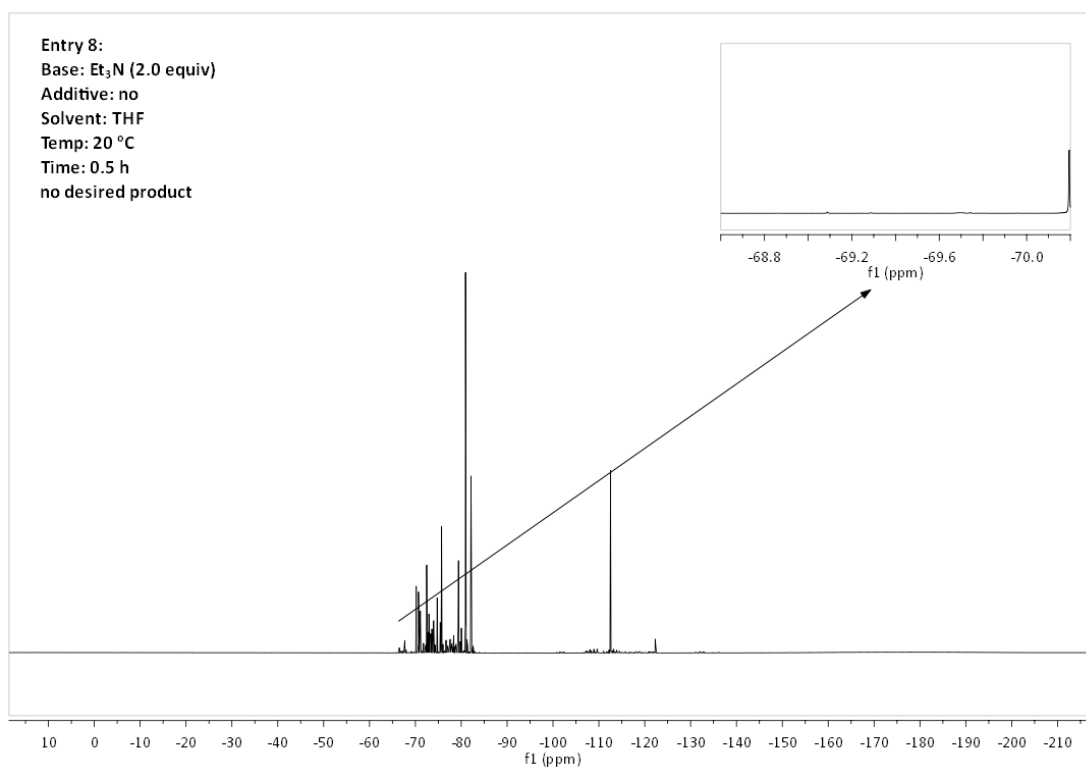

<sup>19</sup>F-NMR spectra of crude reaction mixture for Entry 9 of Table 1

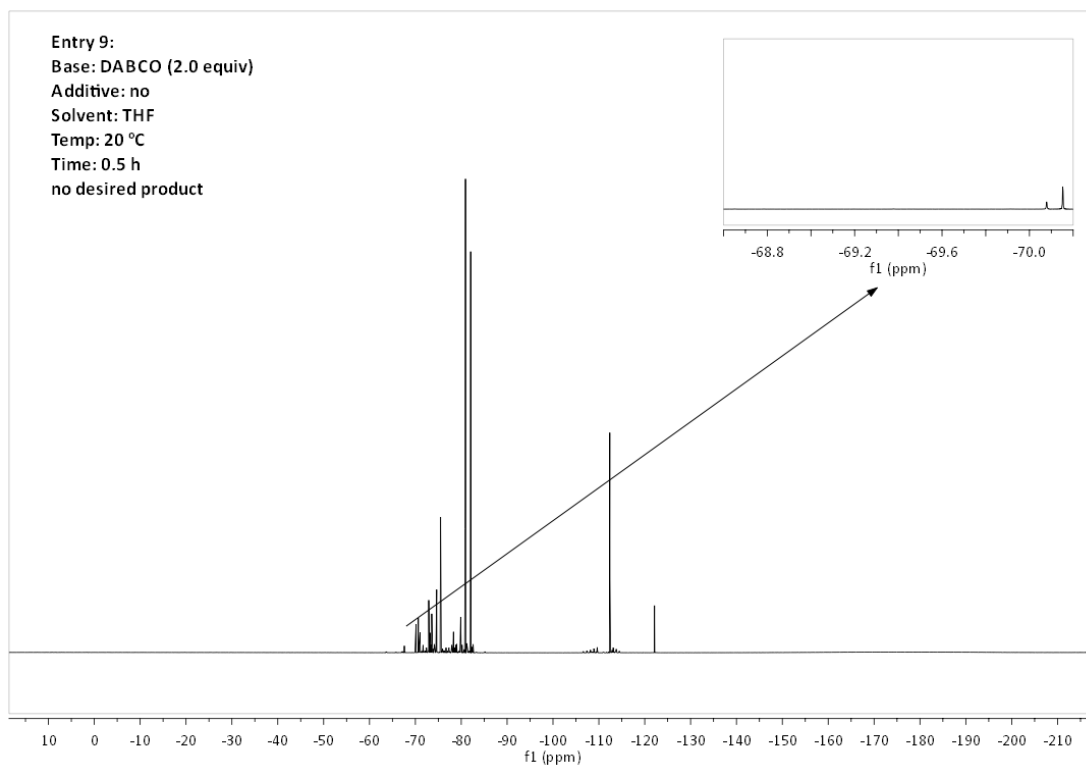

<sup>19</sup>F-NMR spectra of crude reaction mixture for Entry 10 of Table 1

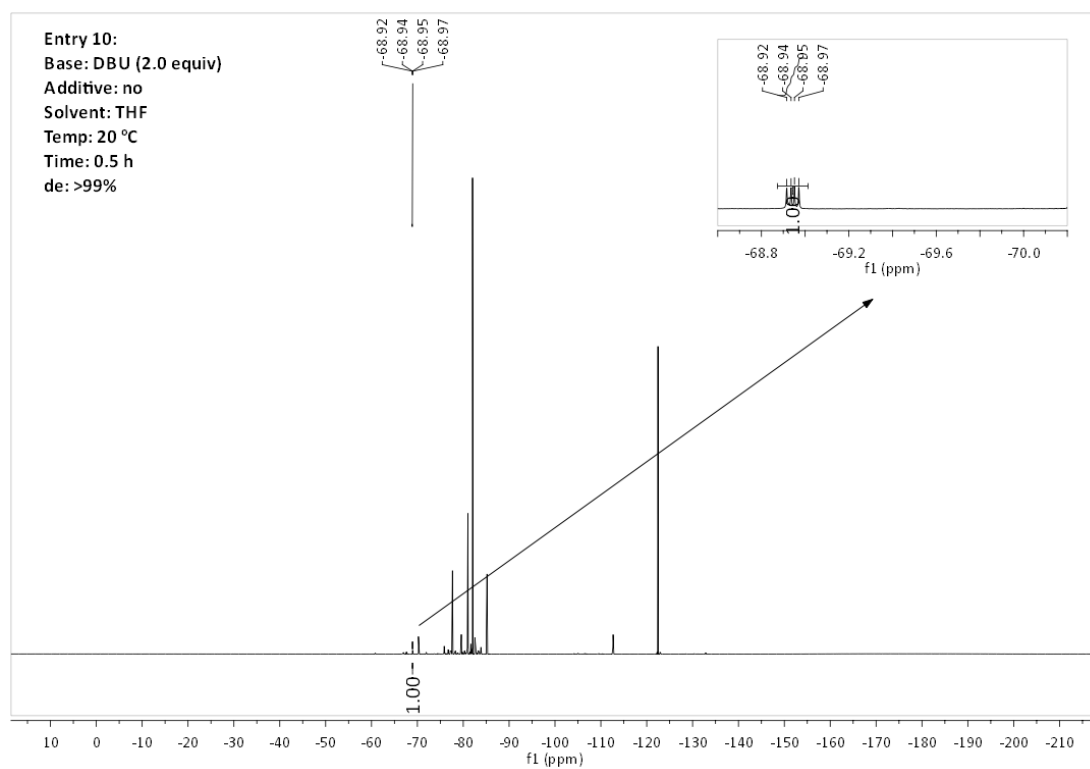

<sup>19</sup>F-NMR spectra of crude reaction mixture for Entry 11 of Table 1

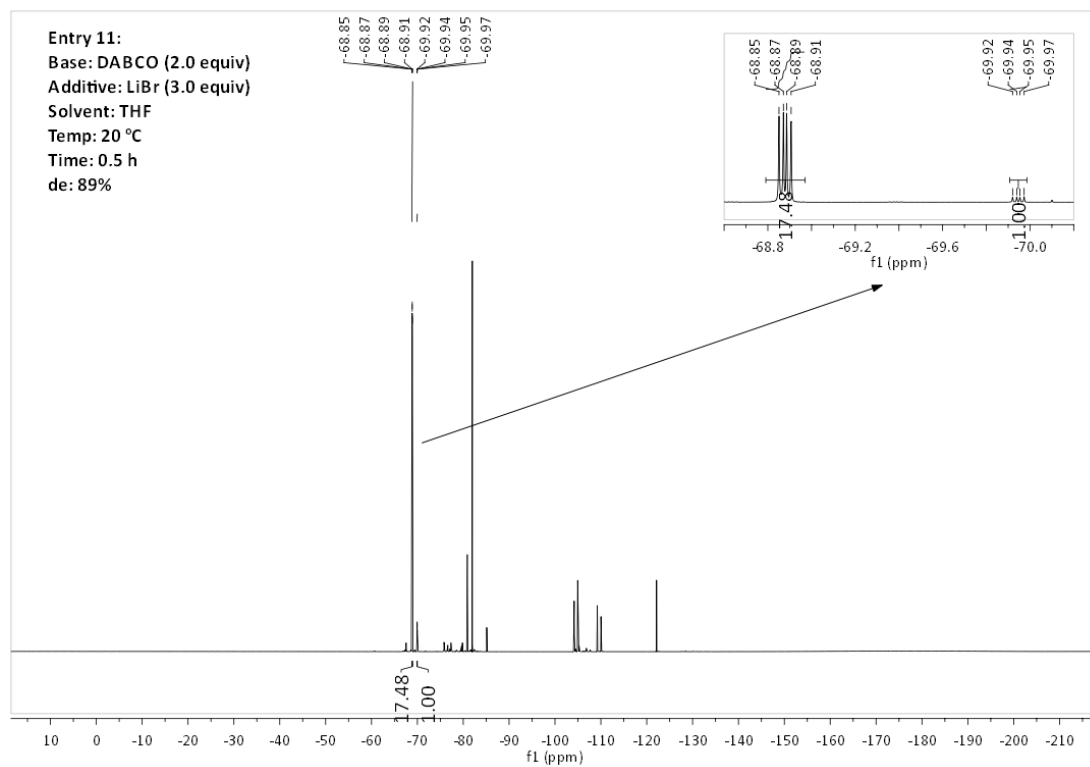

<sup>19</sup>F-NMR spectra of crude reaction mixture for Entry 12 of Table 1

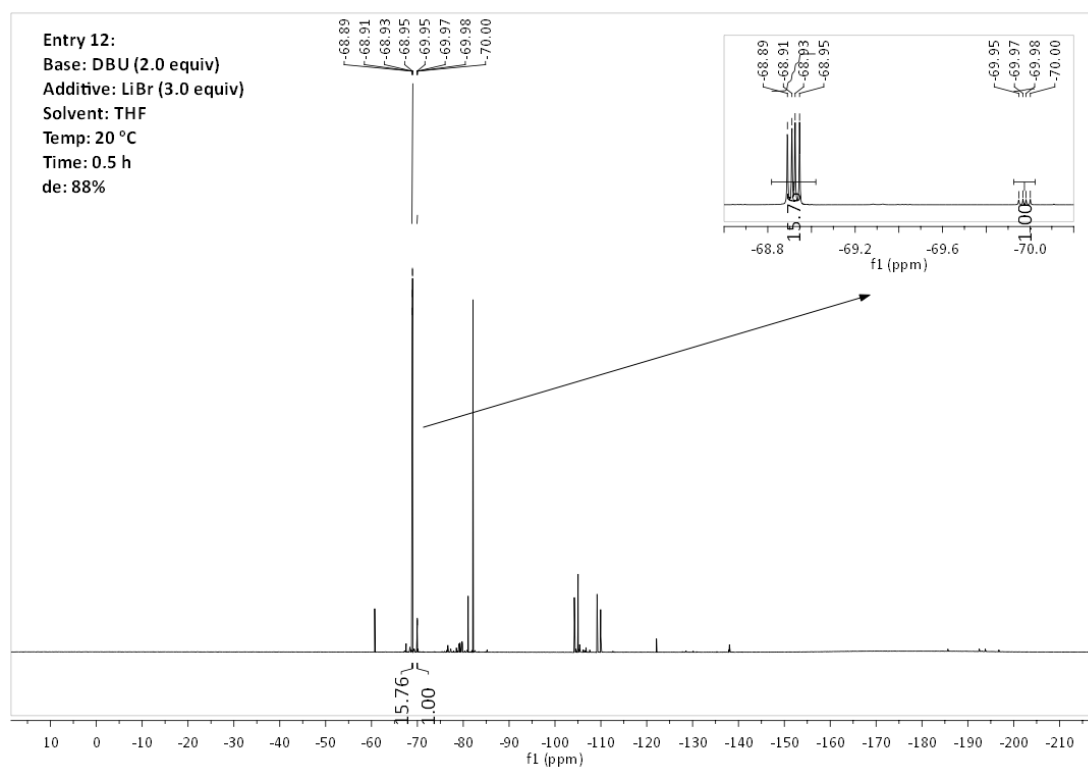

<sup>19</sup>F-NMR spectra of crude reaction mixture for Entry 13 of Table 1

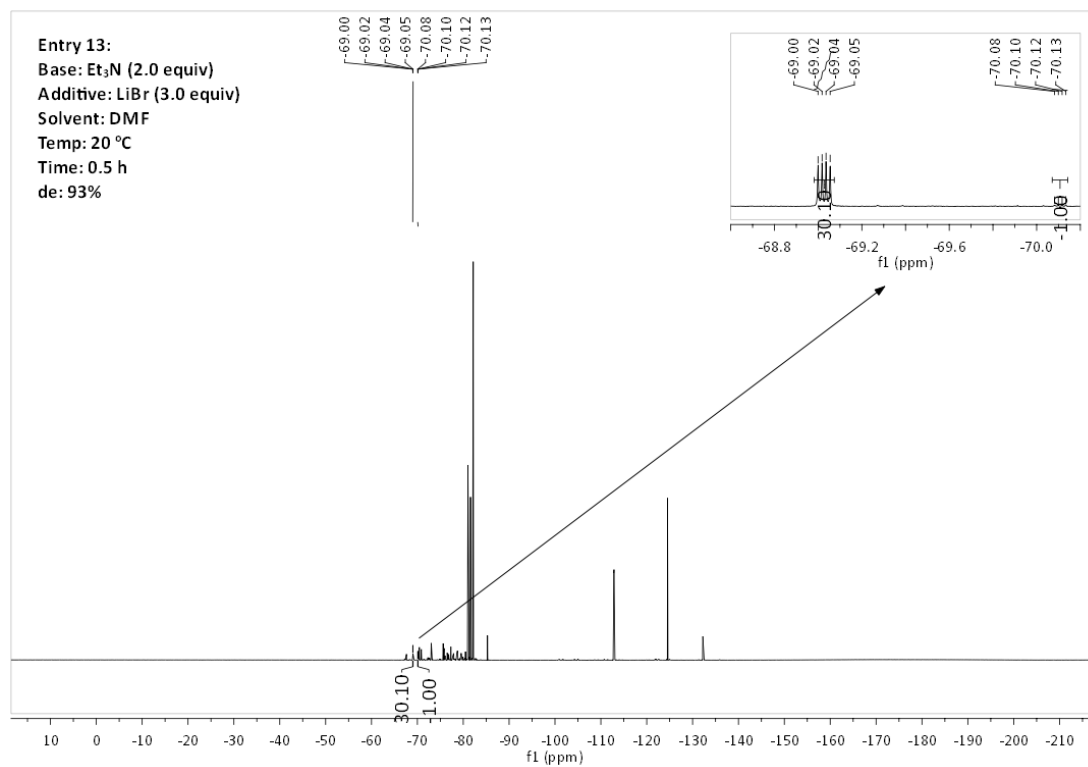



<sup>19</sup>F-NMR spectra of crude reaction mixture for Entry 14 of Table 1

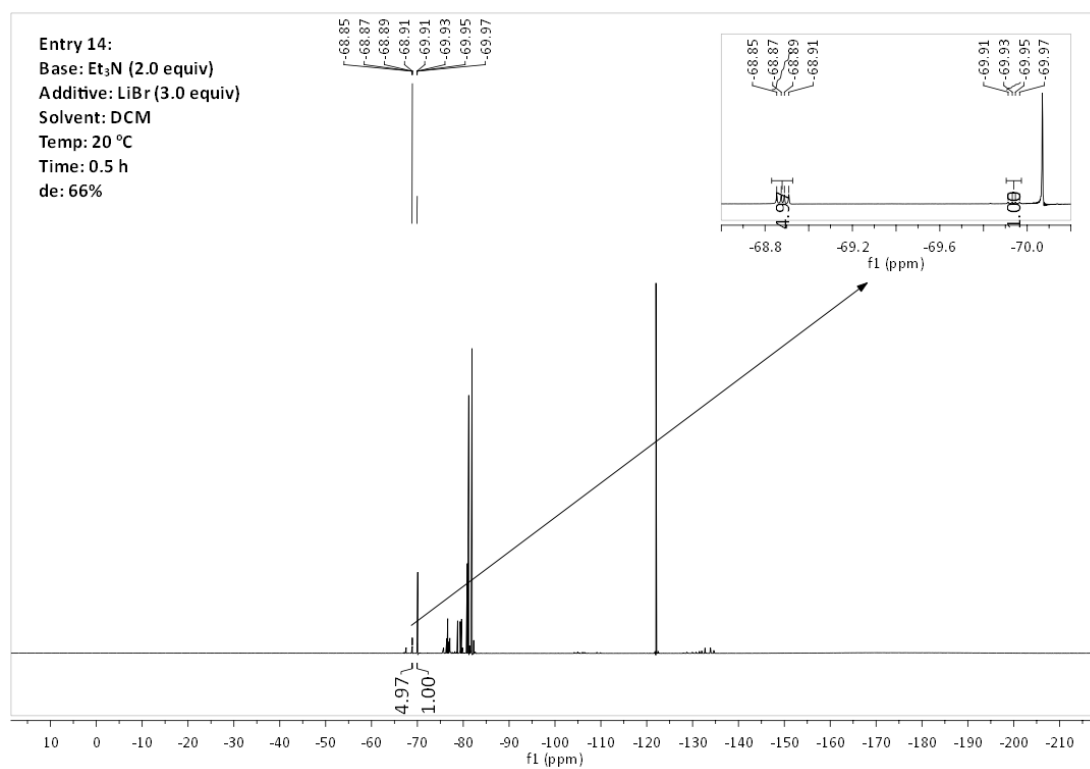

<sup>19</sup>F-NMR spectra of crude reaction mixture for Entry 15 of Table 1

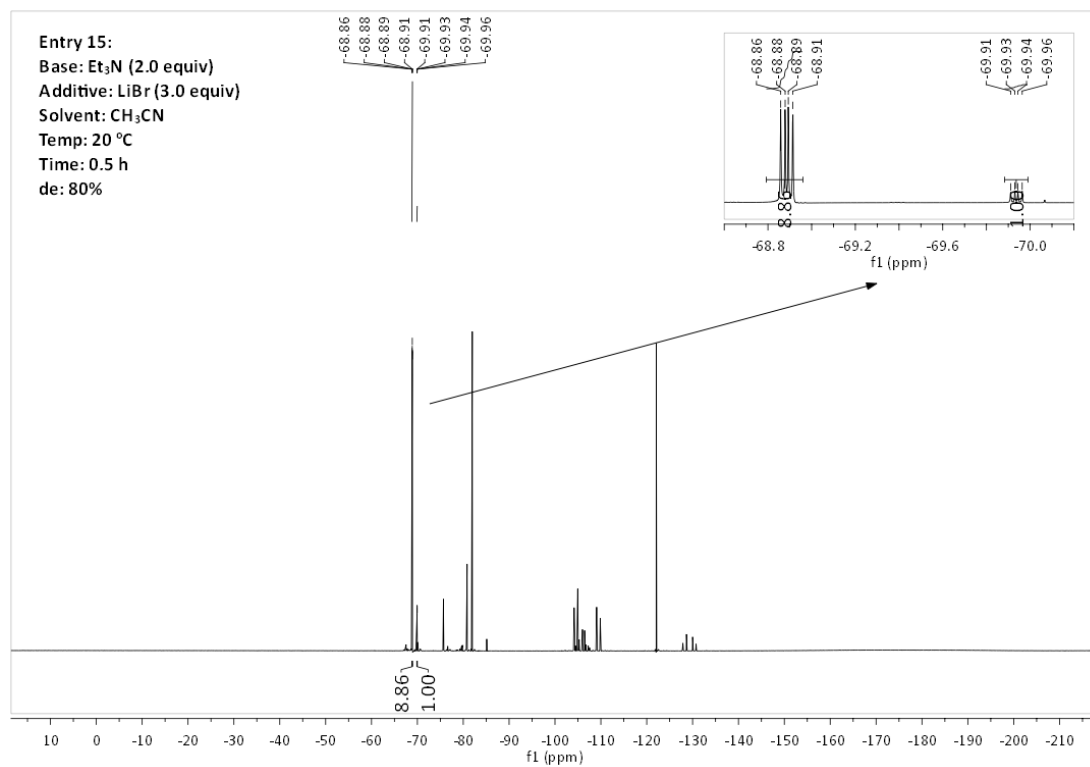

<sup>19</sup>F-NMR spectra of crude reaction mixture for Entry 16 of Table 1

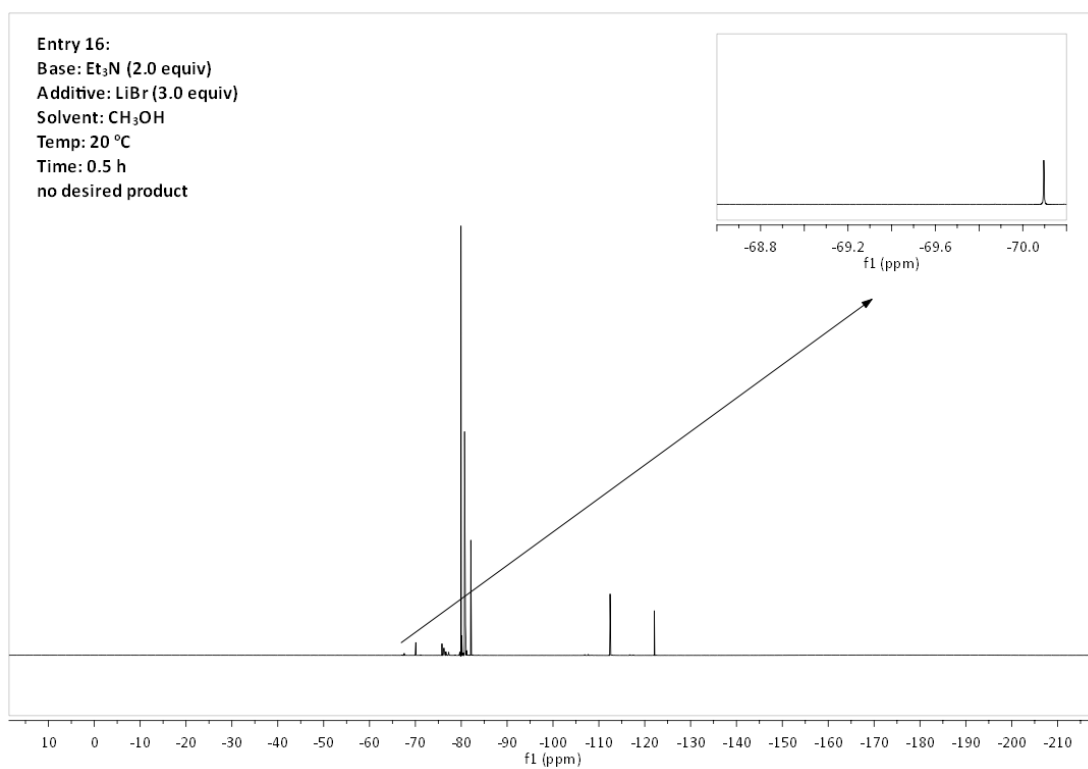

<sup>19</sup>F-NMR spectra of crude reaction mixture for Entry 17 of Table 1

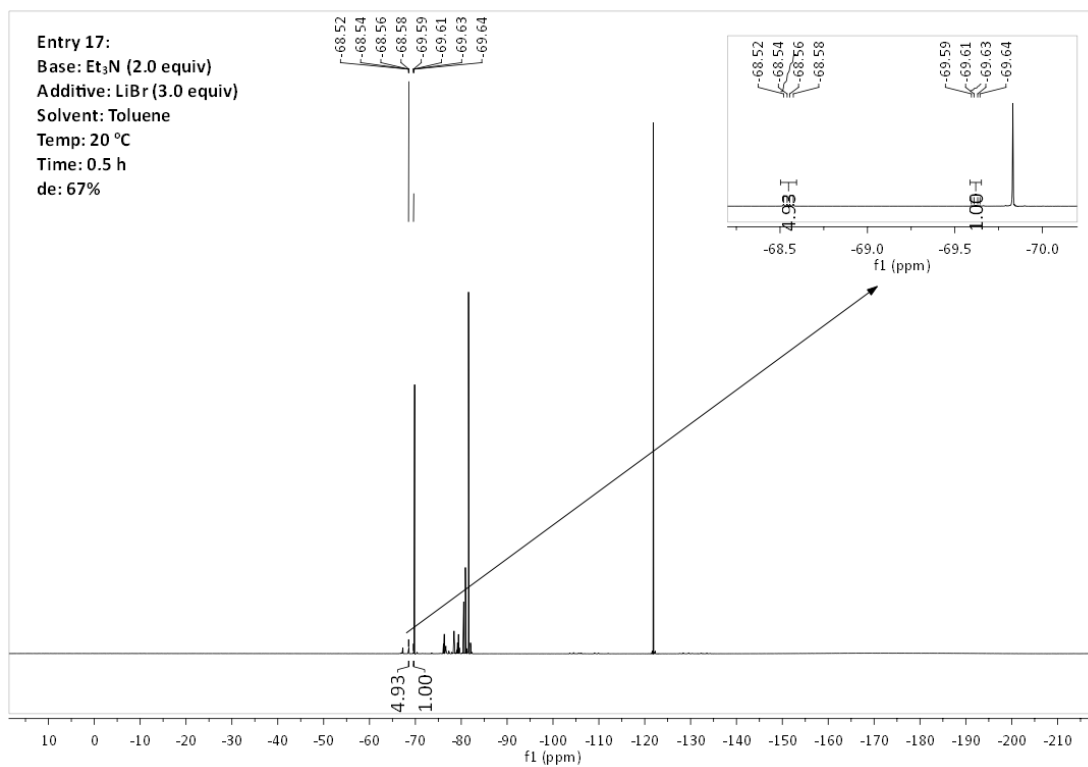

<sup>19</sup>F-NMR spectra of crude reaction mixture for Entry 18 of Table 1

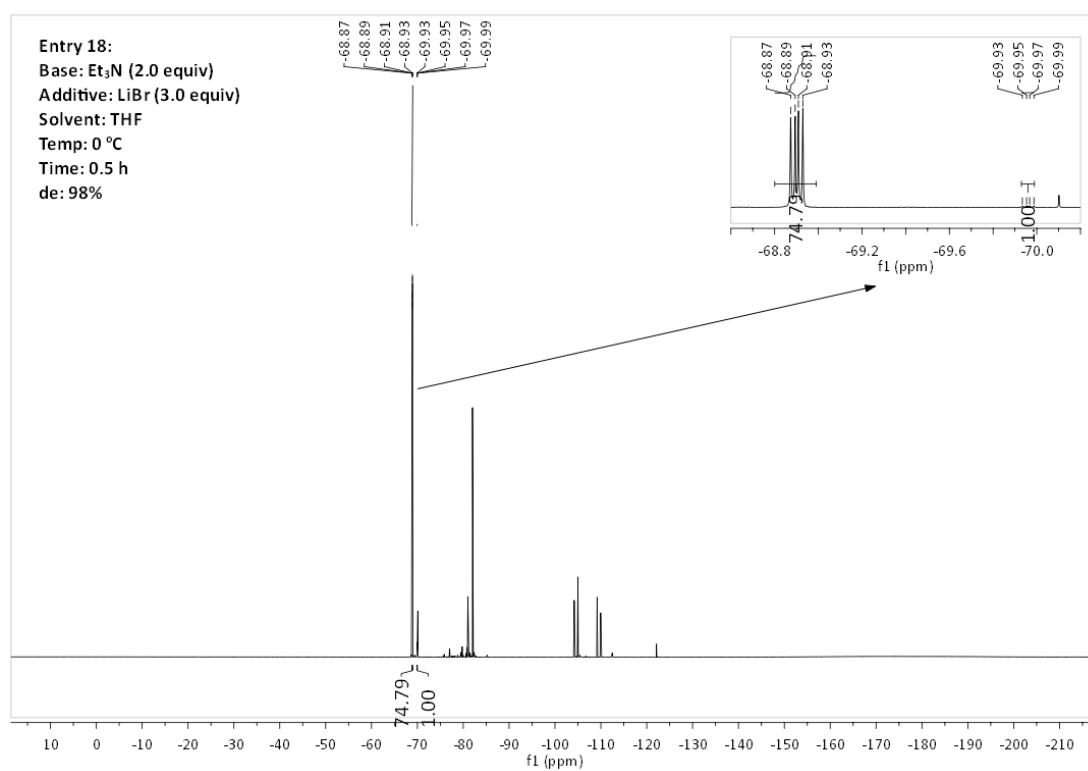

## 2. NMR spectra of compounds 10-13

$^1\text{H}$  NMR,  $^{13}\text{C}$  NMR and  $^{19}\text{F}$  NMR spectra of **10a**

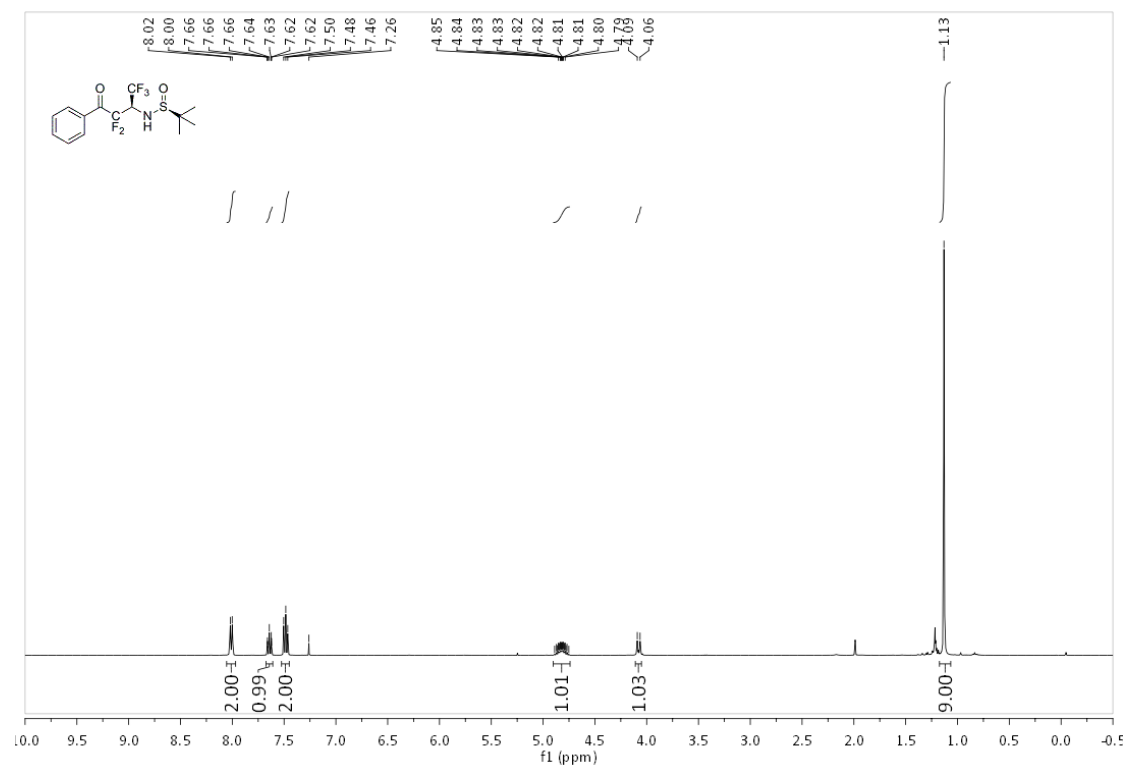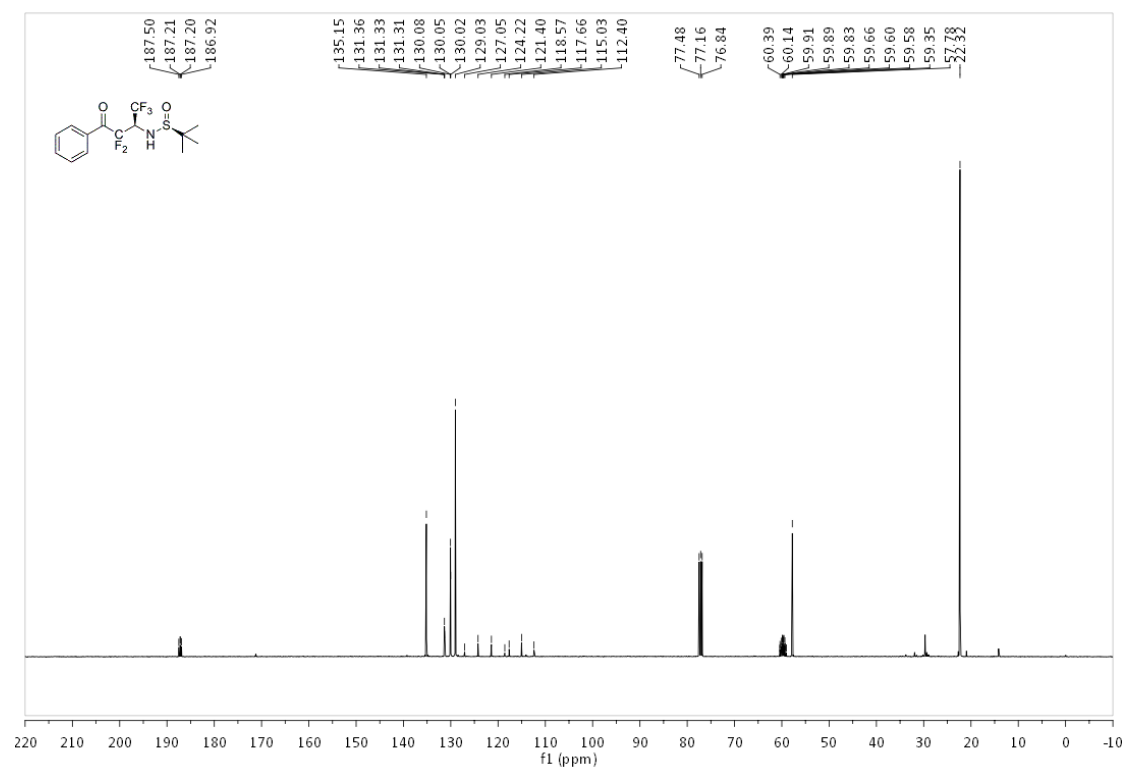

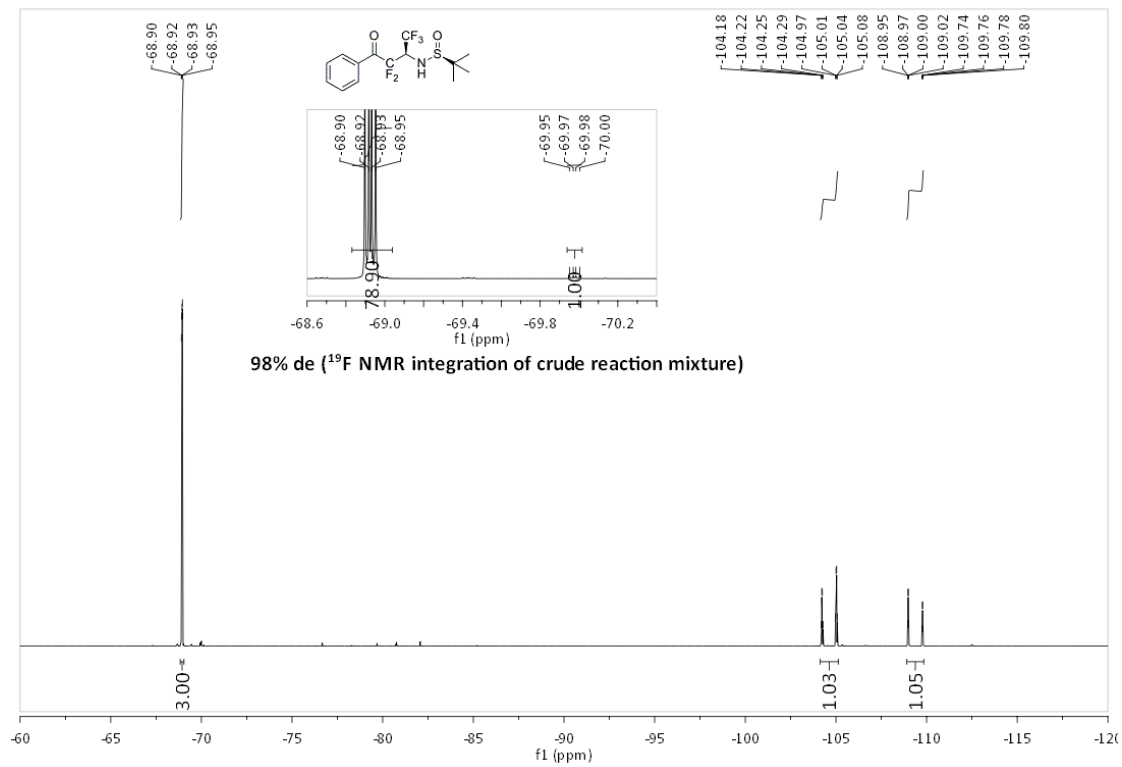

<sup>1</sup>H NMR, <sup>13</sup>C NMR and <sup>19</sup>F NMR spectra of **10b**

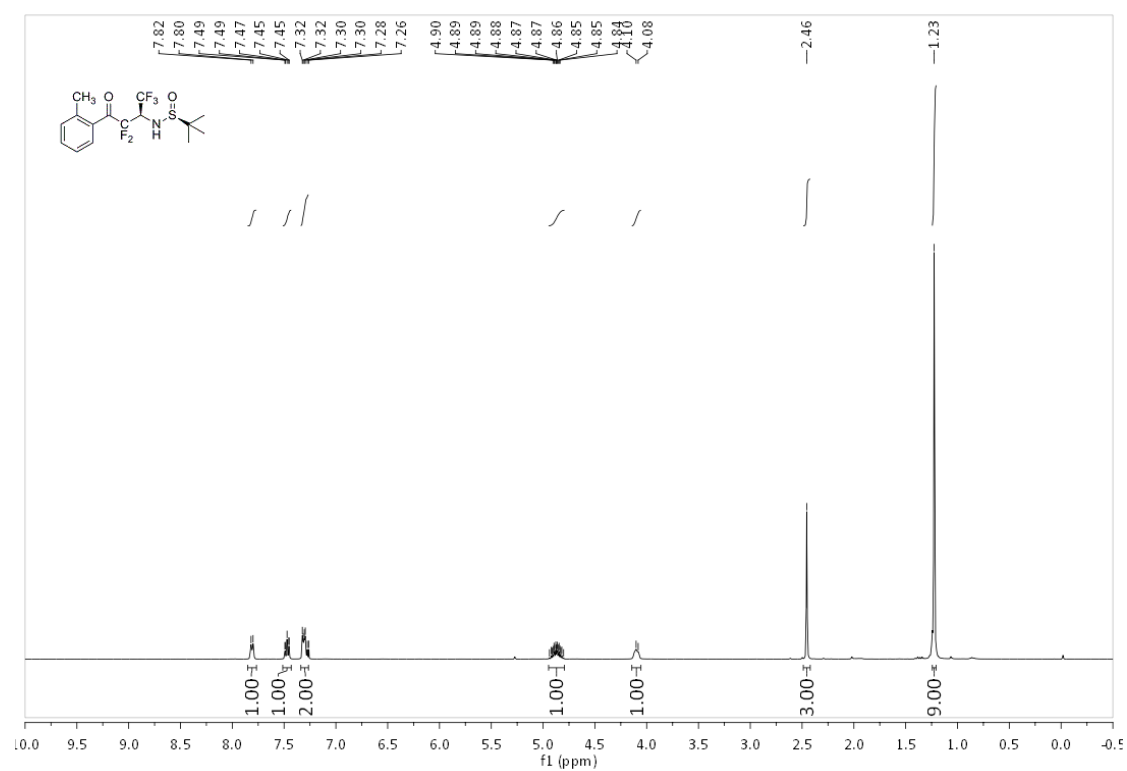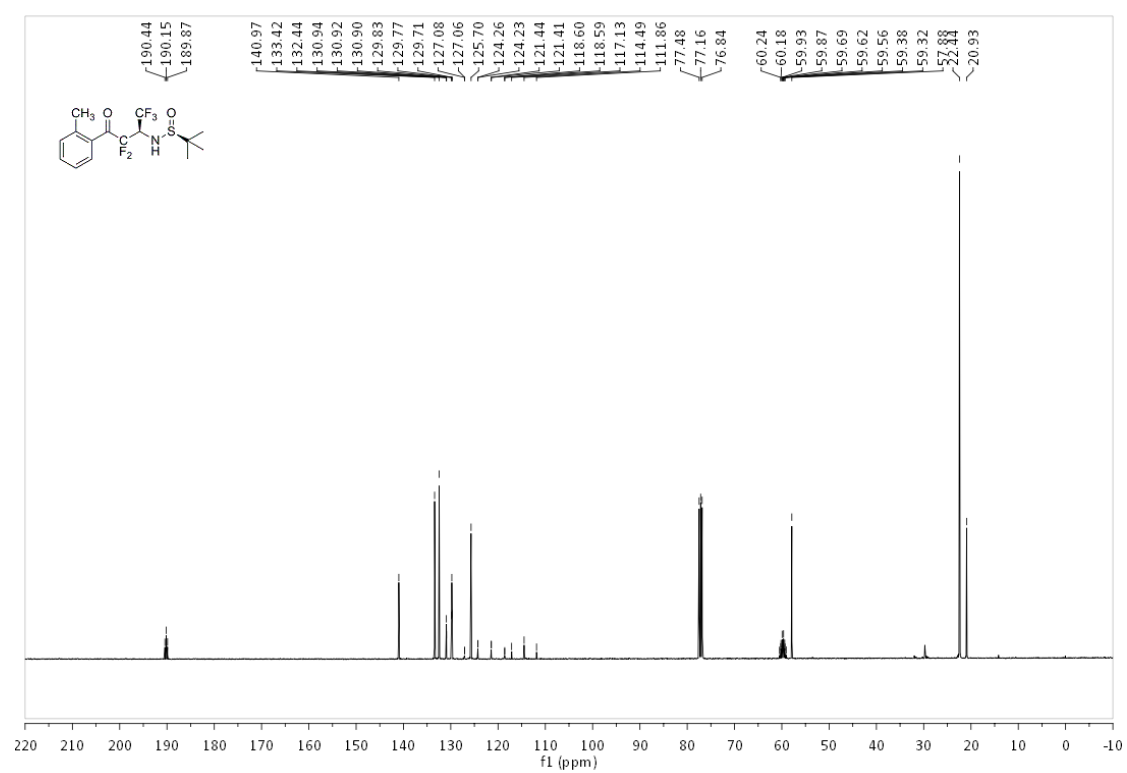

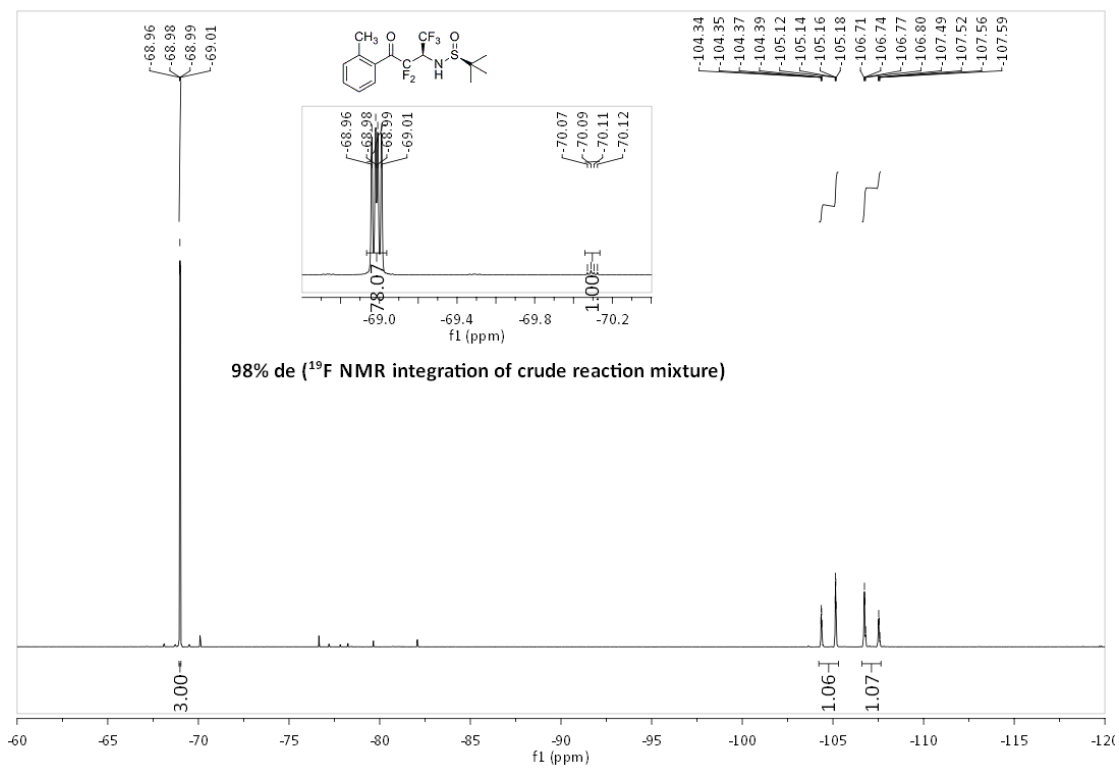

<sup>1</sup>H NMR, <sup>13</sup>C NMR and <sup>19</sup>F NMR spectra of **10c**

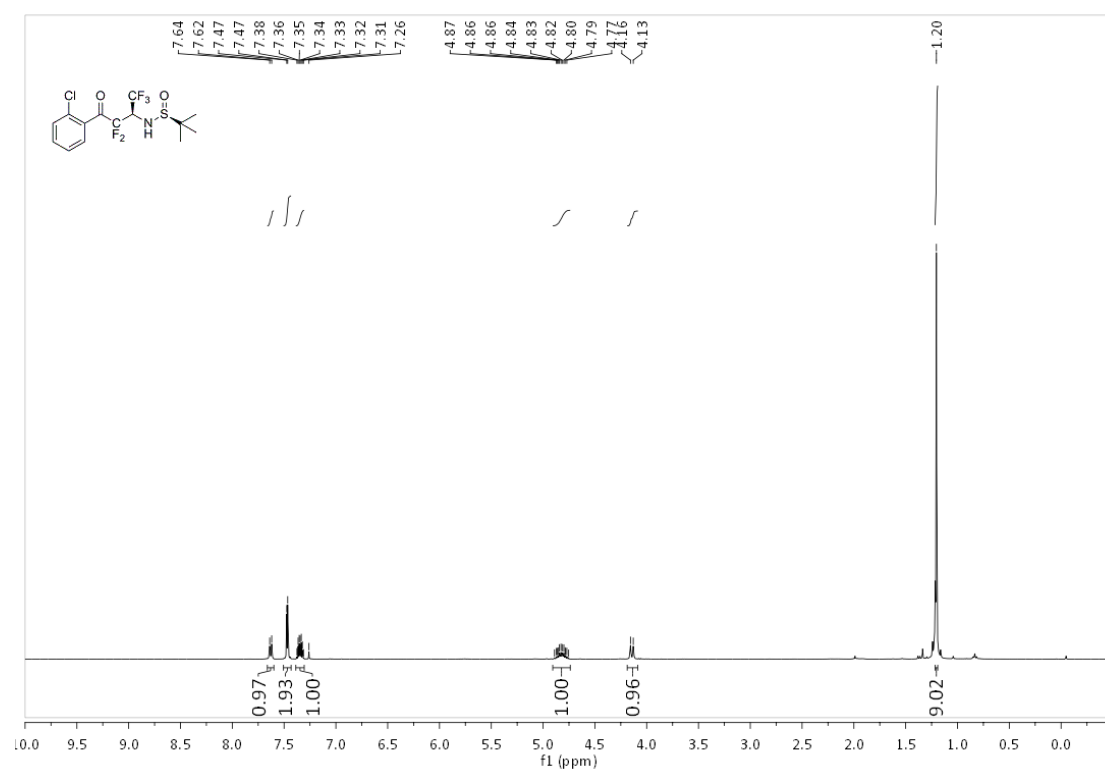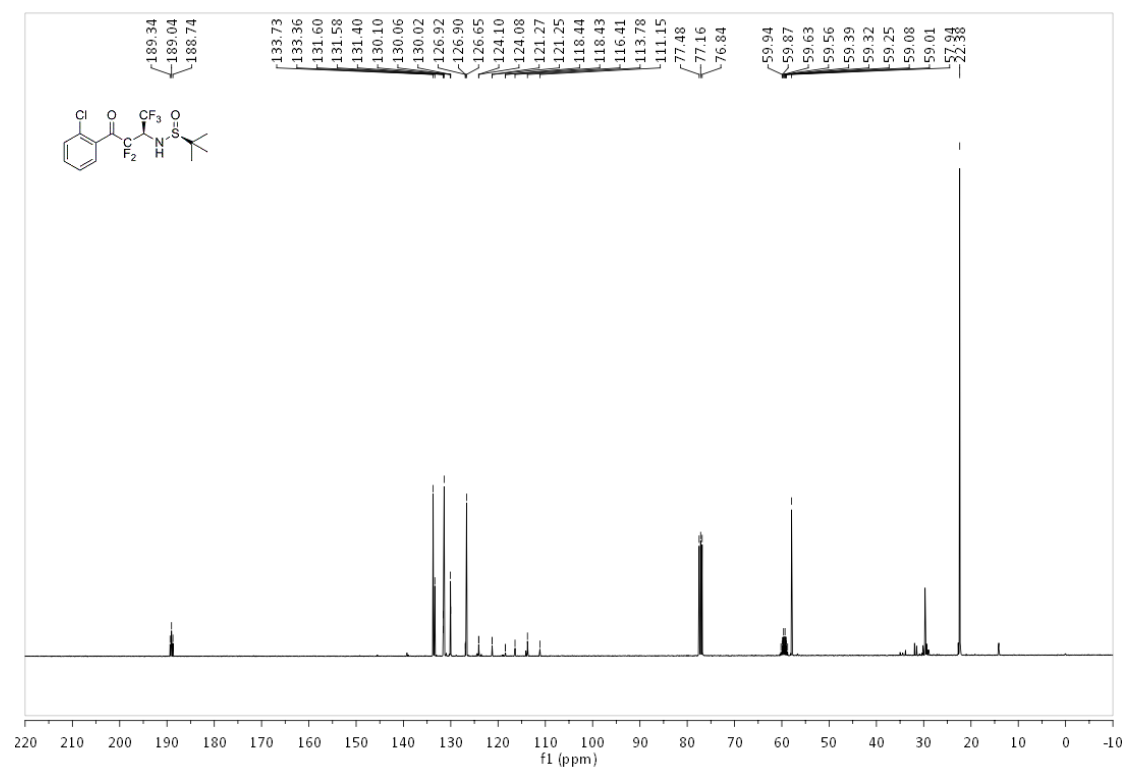



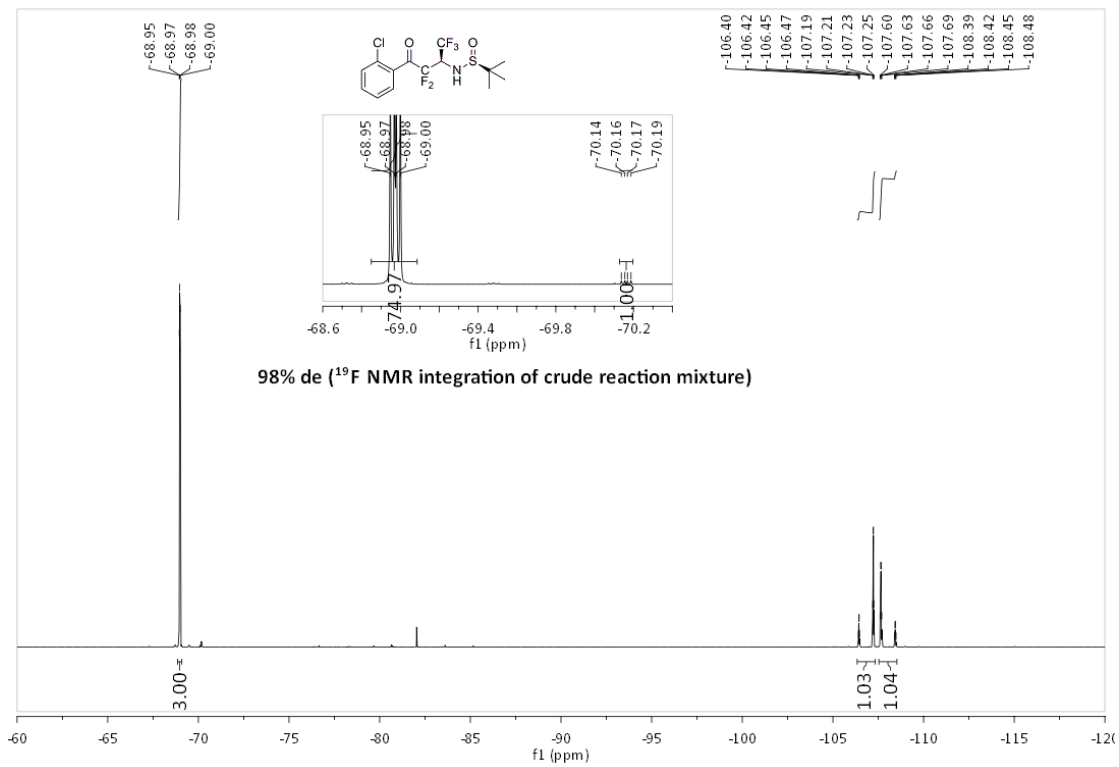

$^1\text{H}$  NMR,  $^{13}\text{C}$  NMR and  $^{19}\text{F}$  NMR spectra of **10d**

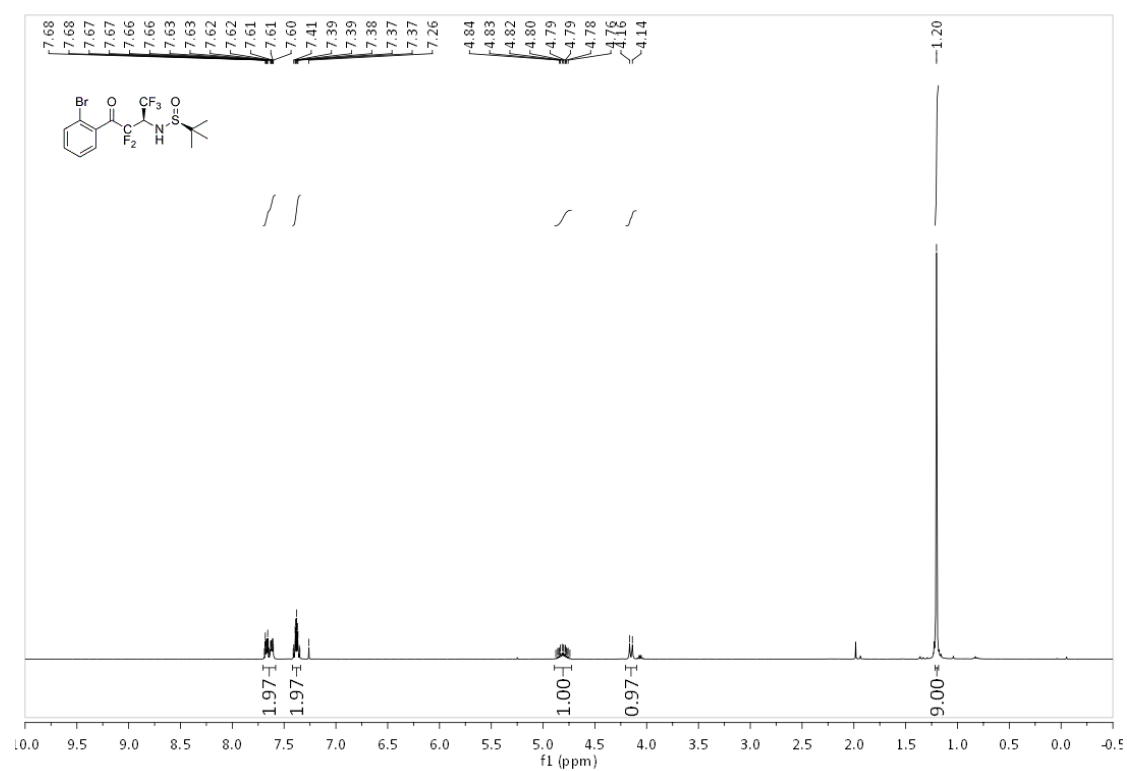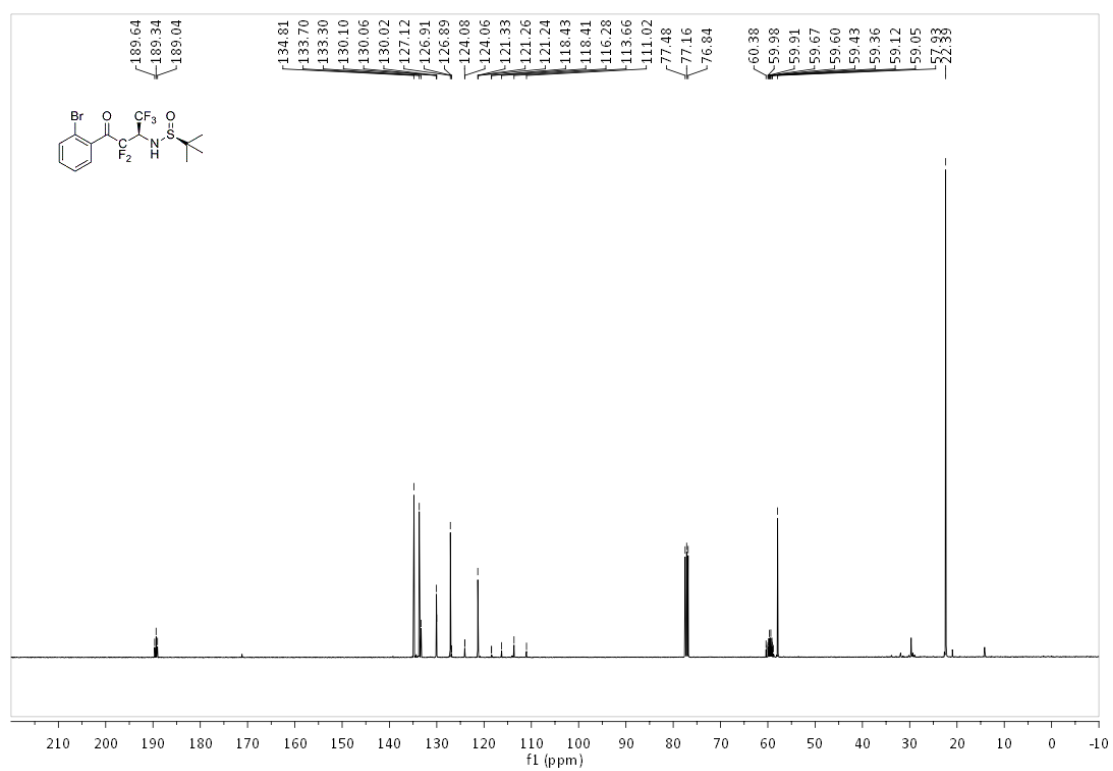

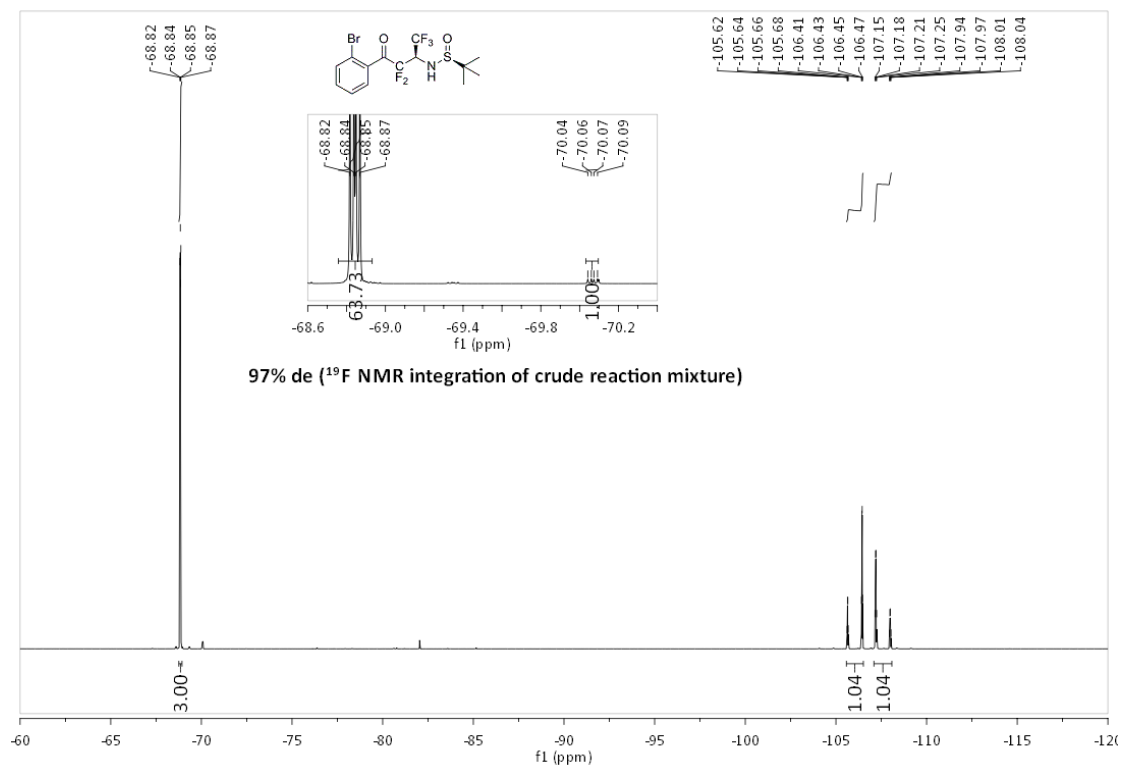

$^1\text{H}$  NMR,  $^{13}\text{C}$  NMR and  $^{19}\text{F}$  NMR spectra of **10e**

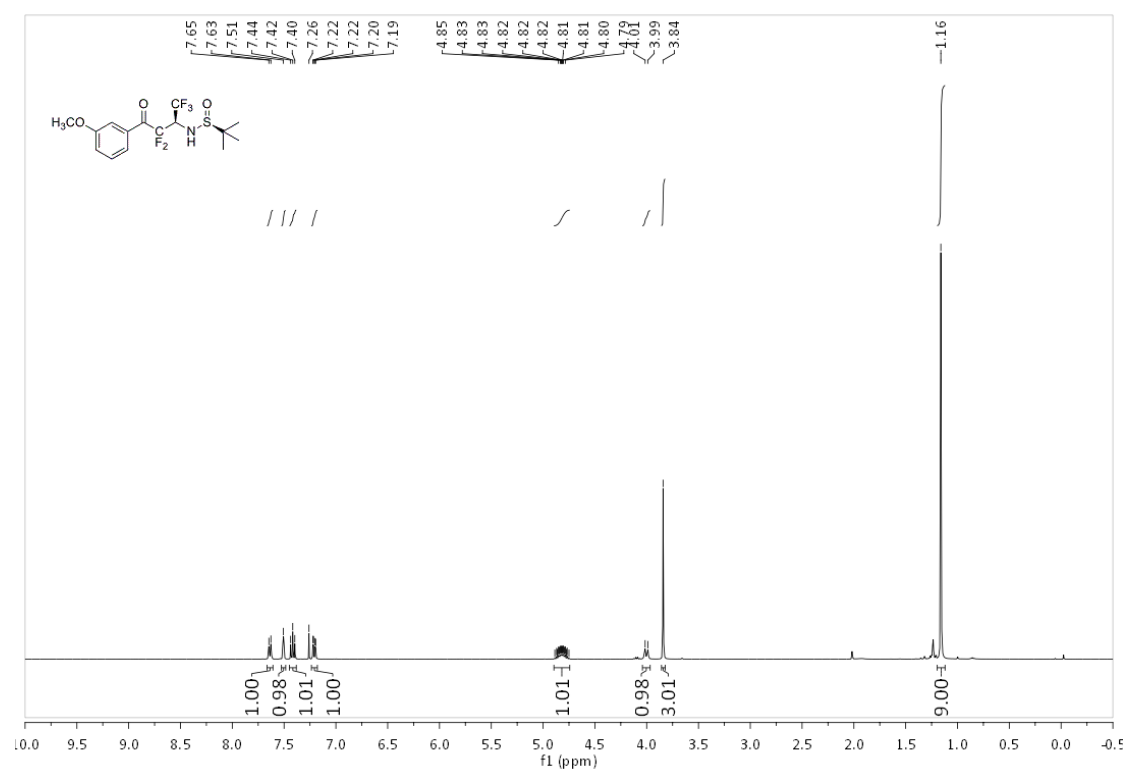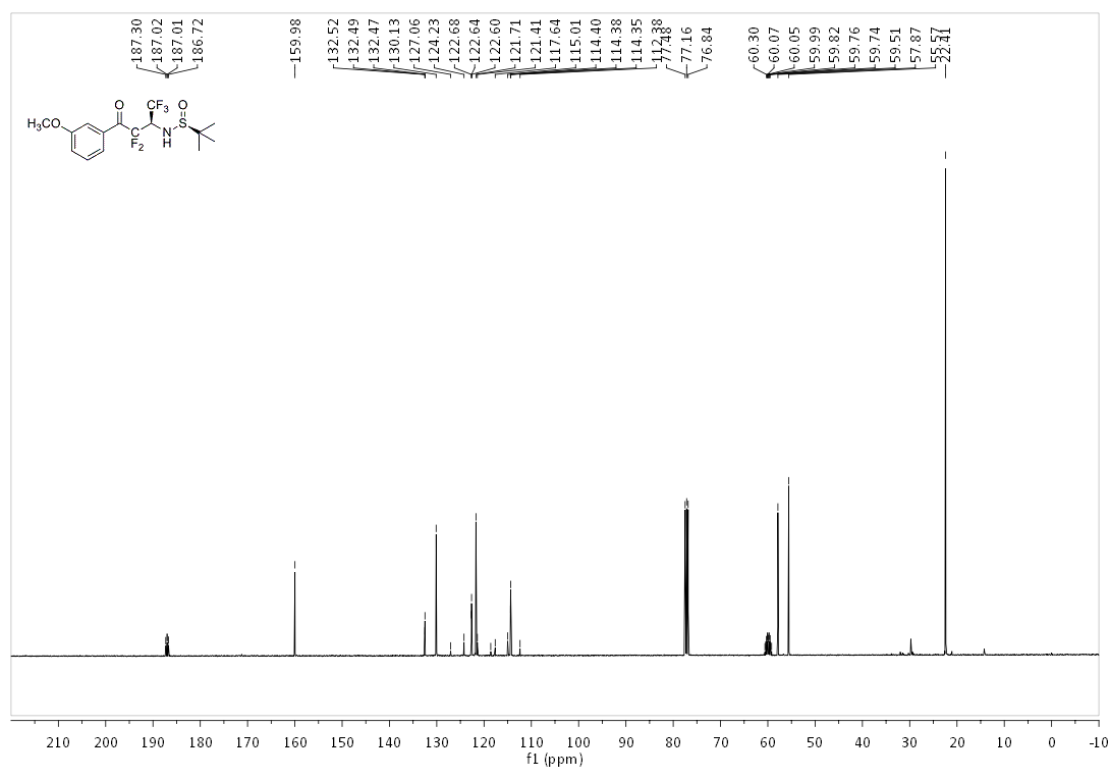

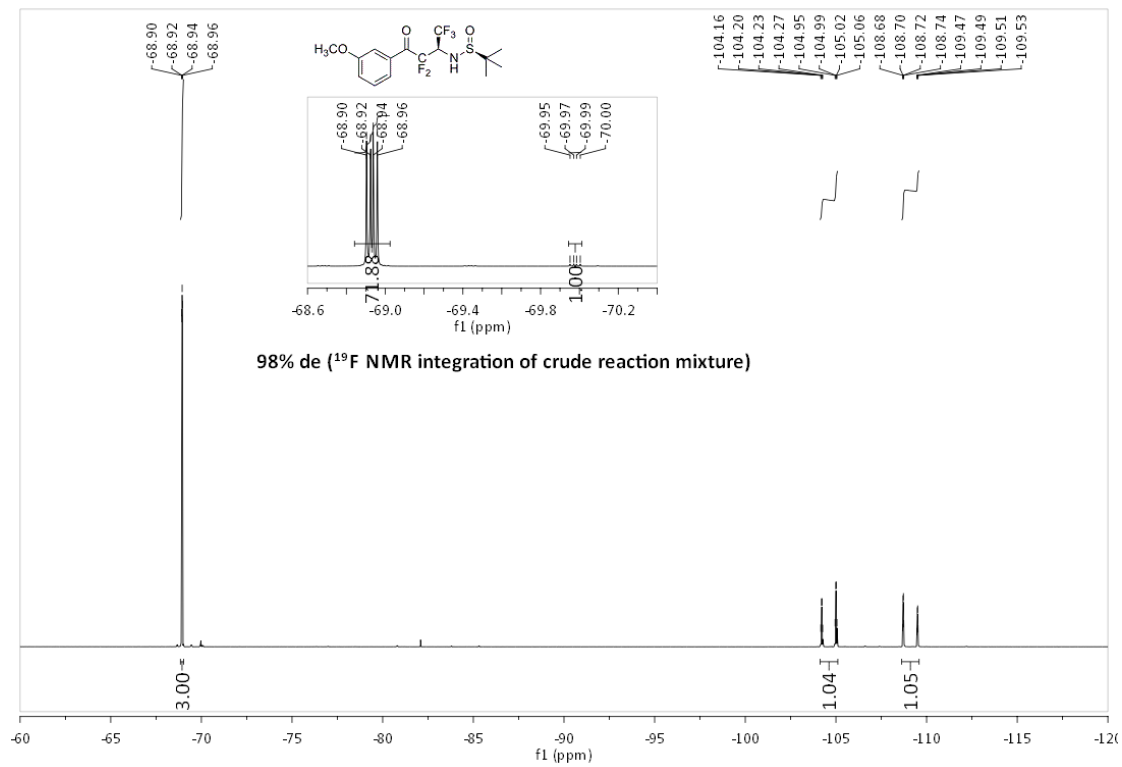

<sup>1</sup>H NMR, <sup>13</sup>C NMR and <sup>19</sup>F NMR spectra of **10f**

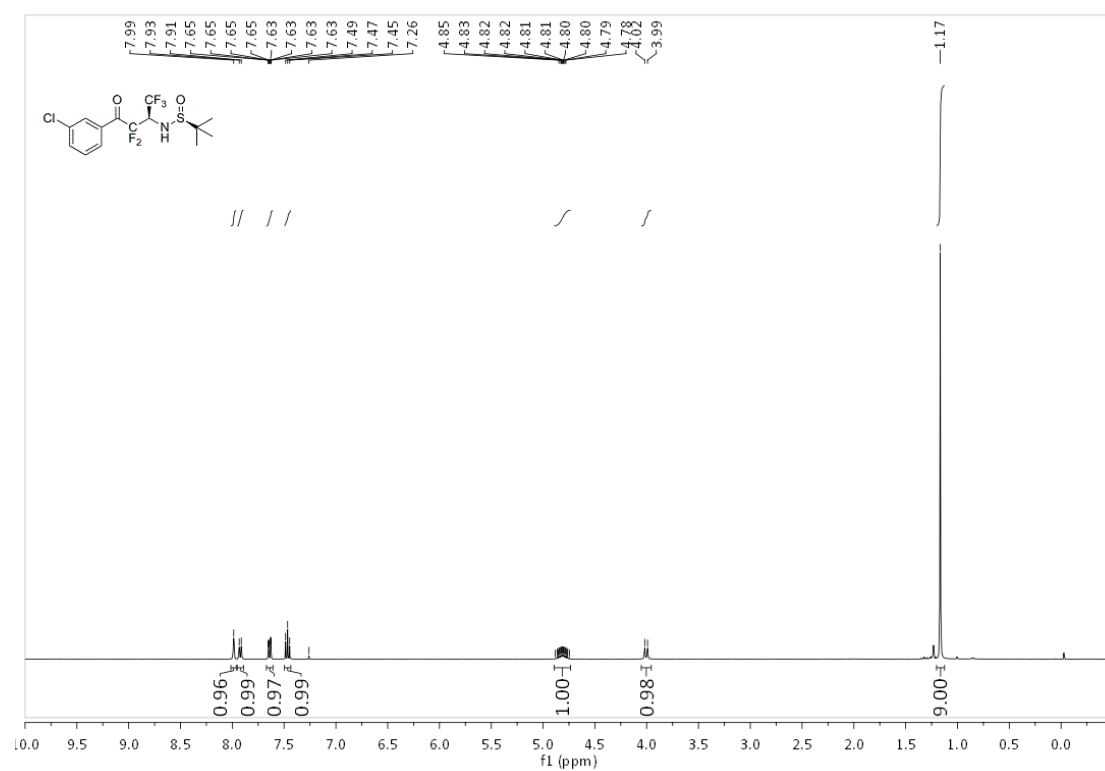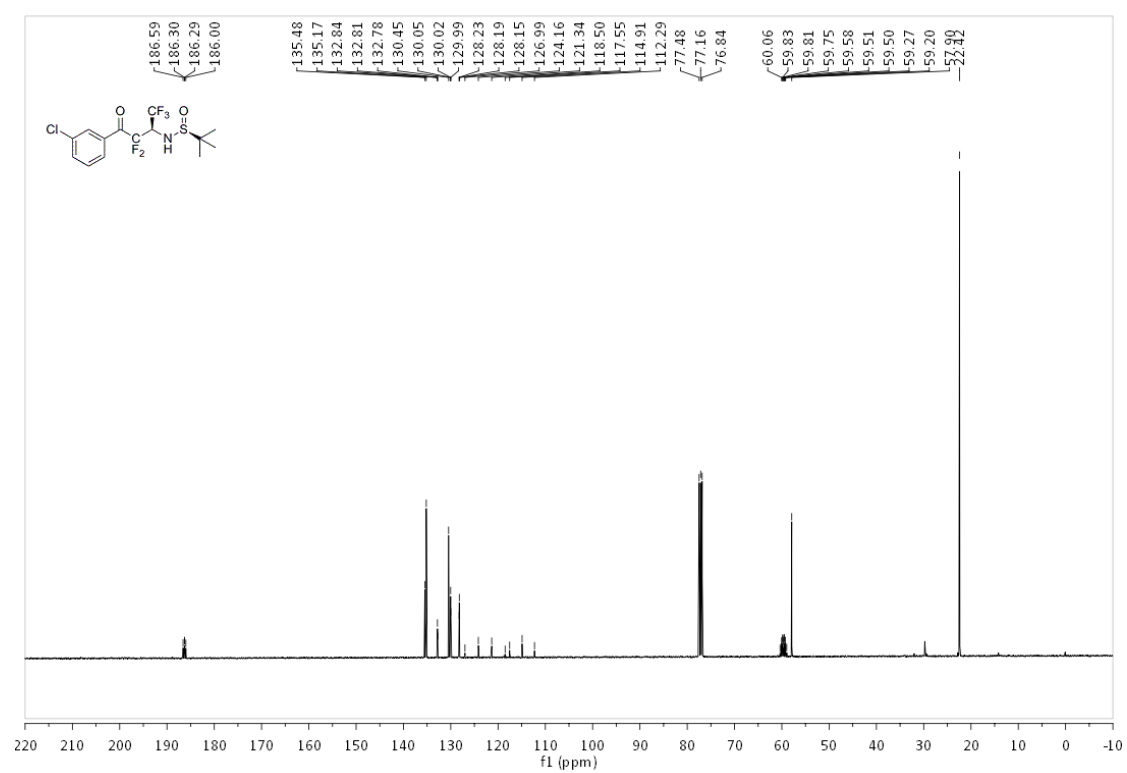

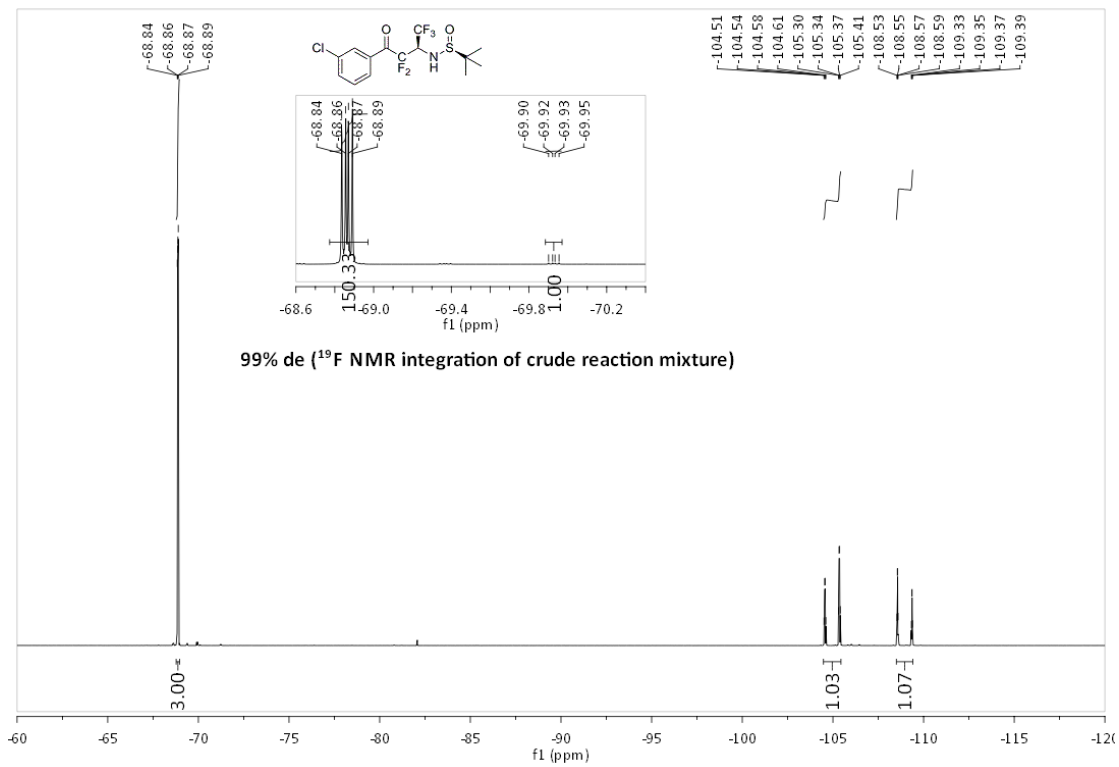

<sup>1</sup>H NMR, <sup>13</sup>C NMR and <sup>19</sup>F NMR spectra of **10g**

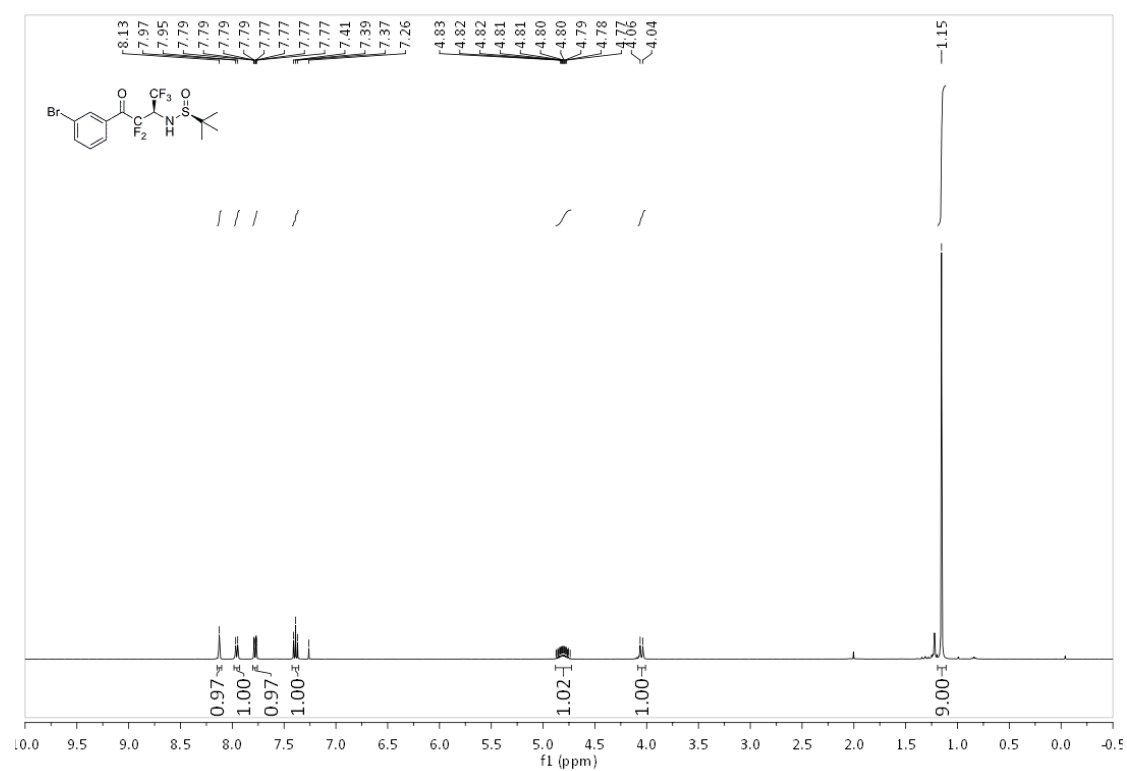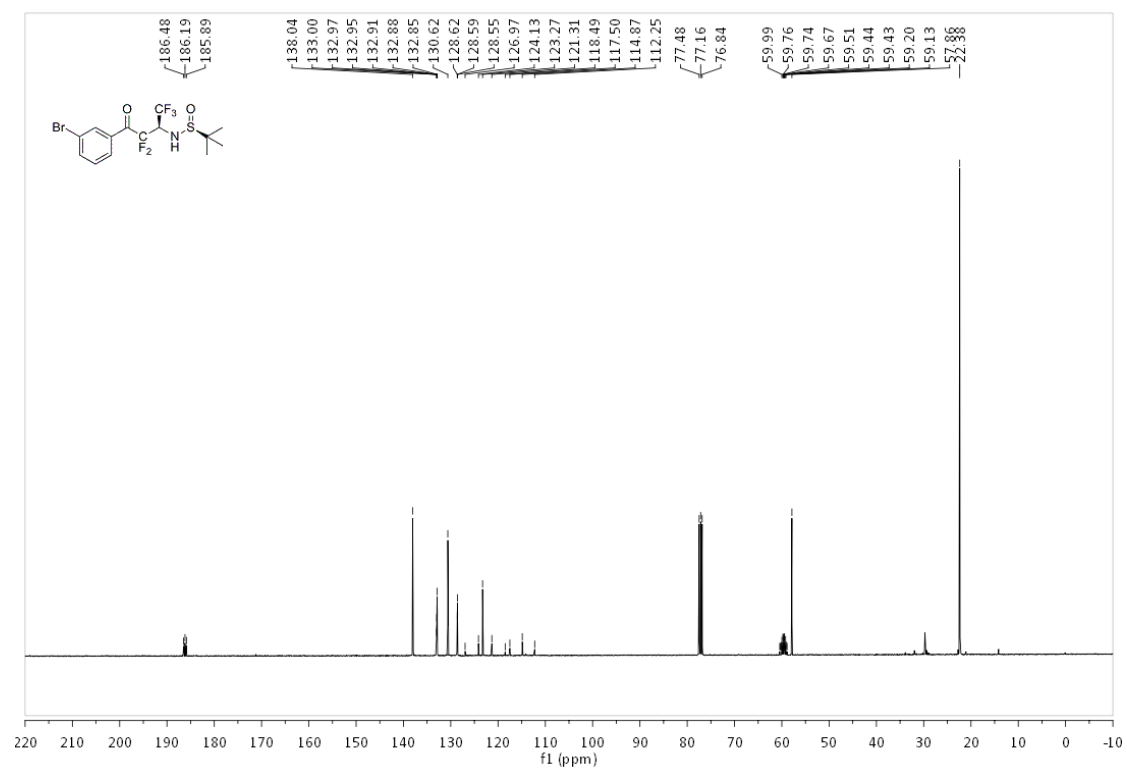



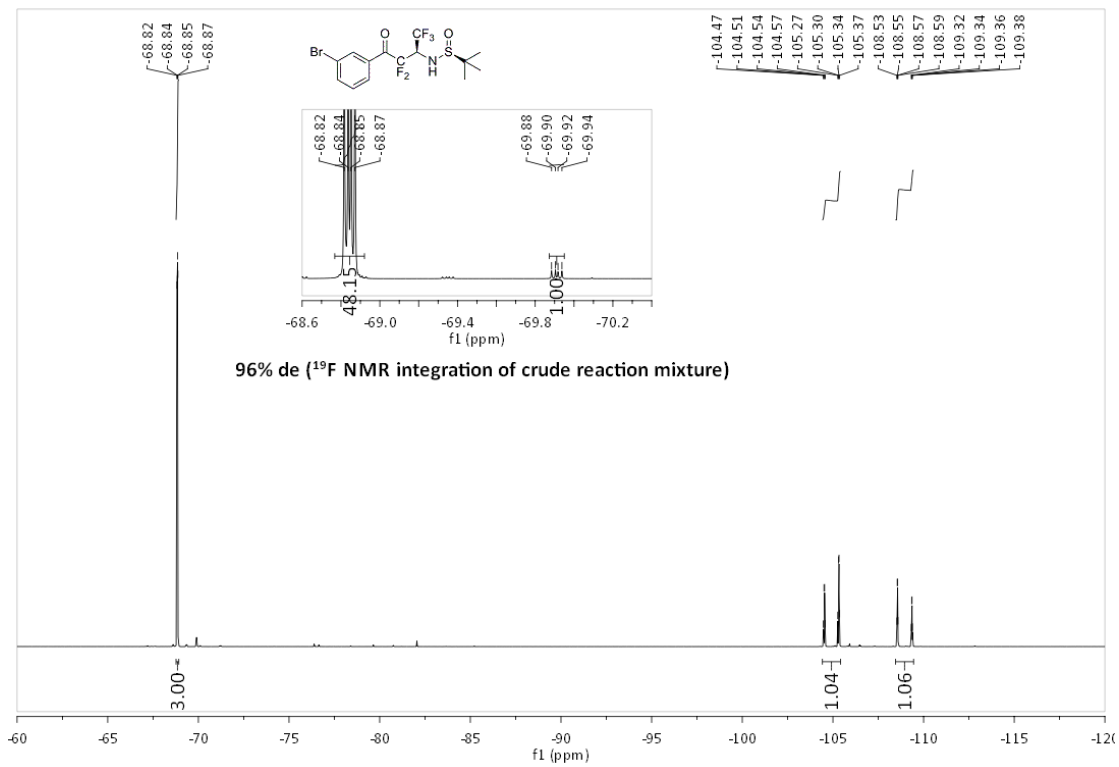

$^1\text{H}$  NMR,  $^{13}\text{C}$  NMR and  $^{19}\text{F}$  NMR spectra of **10h**

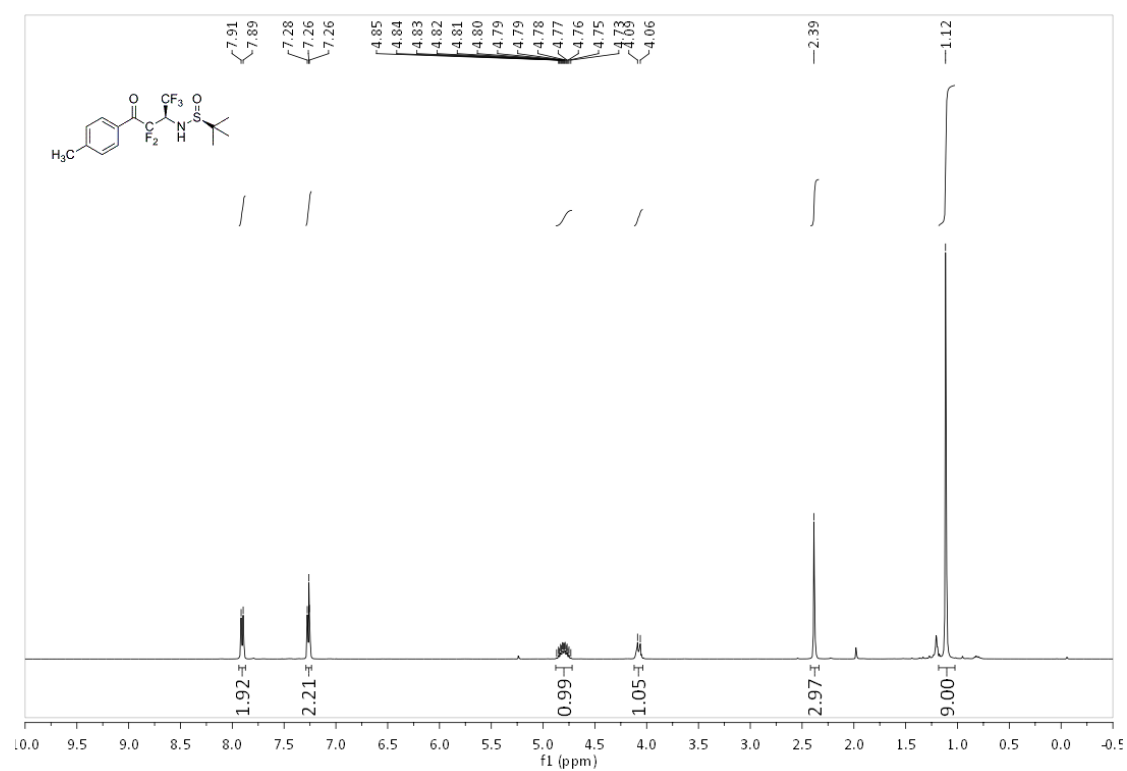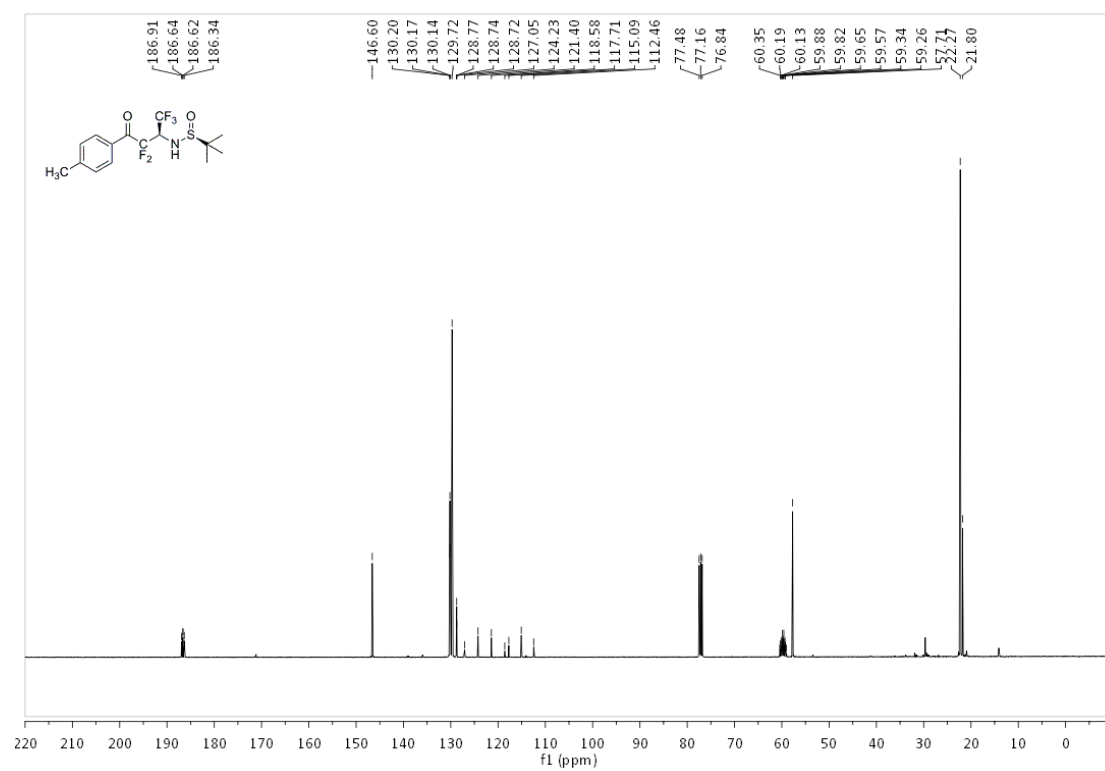

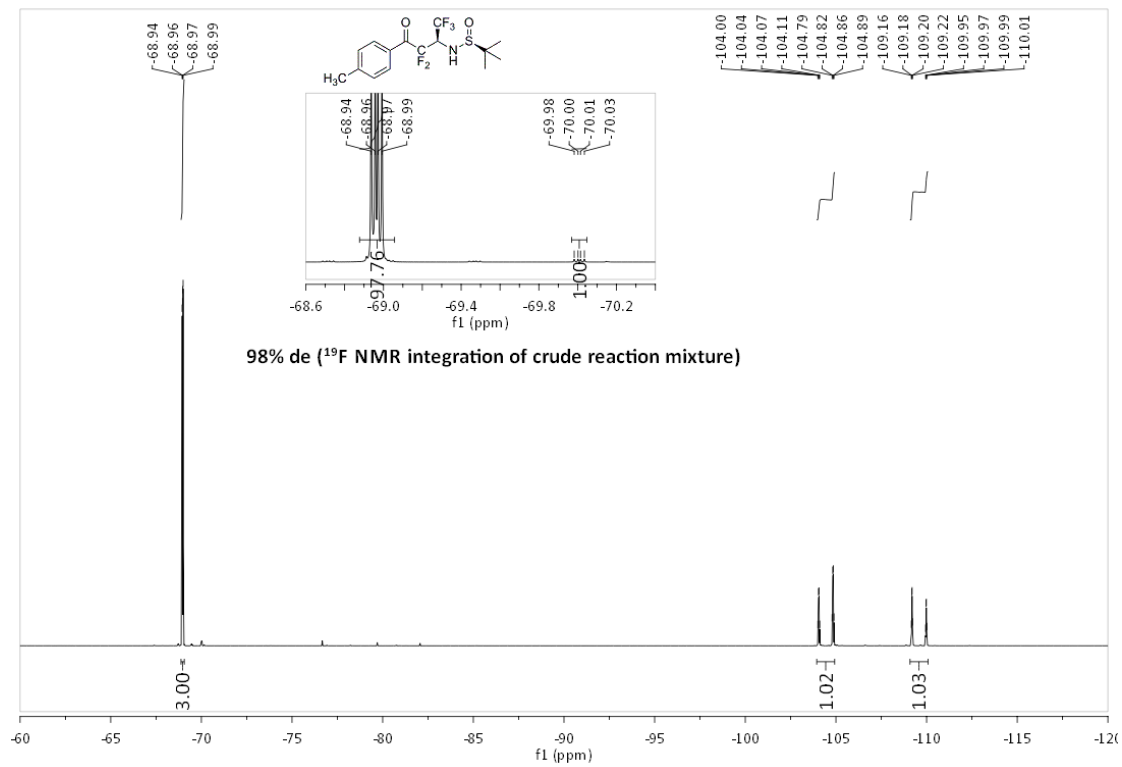

$^1\text{H}$  NMR,  $^{13}\text{C}$  NMR and  $^{19}\text{F}$  NMR spectra of **10i**

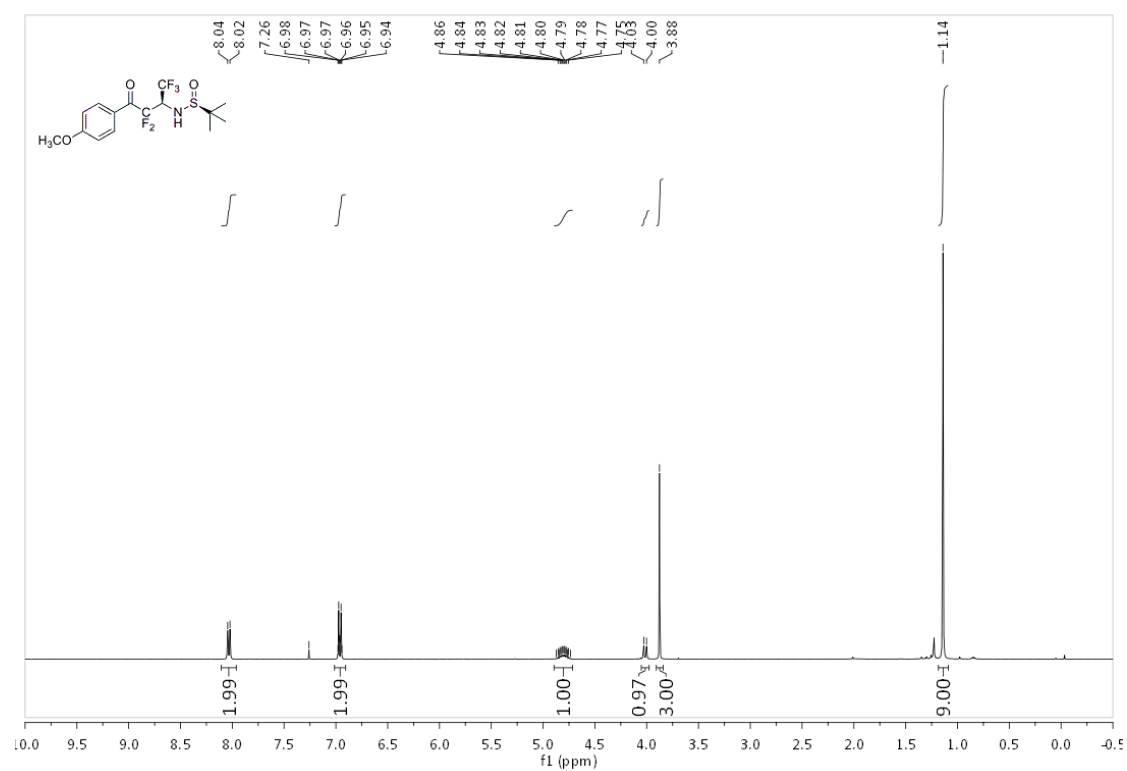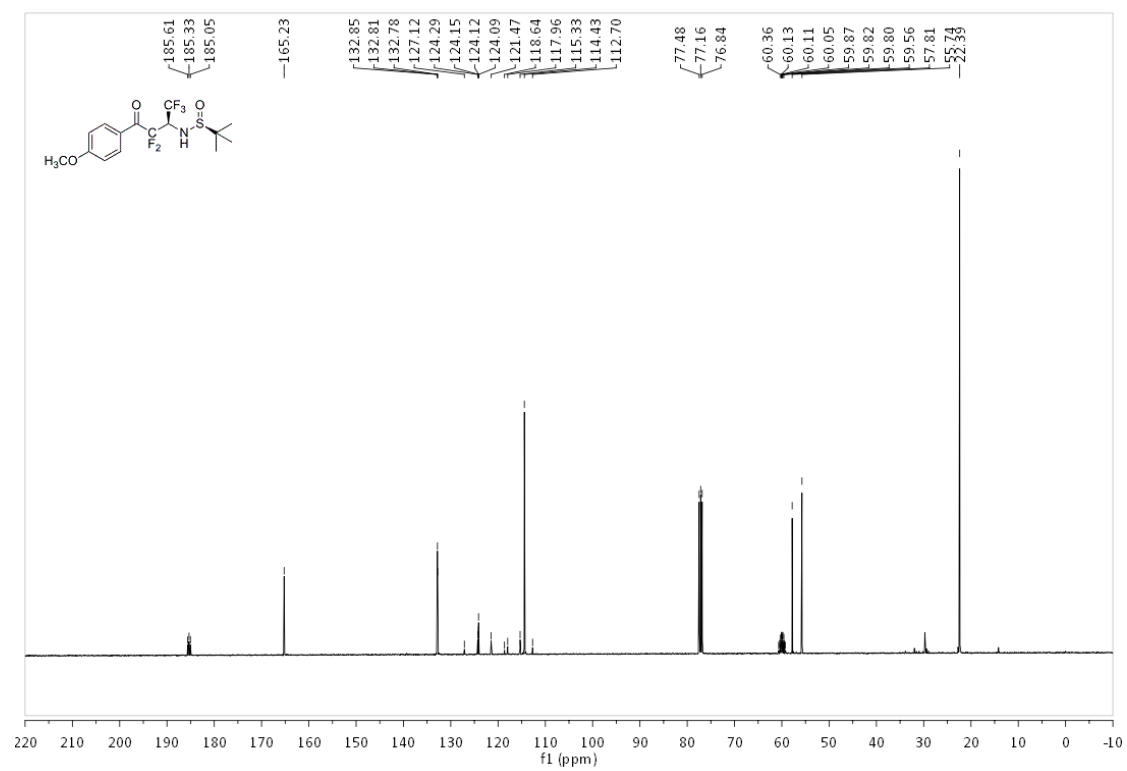

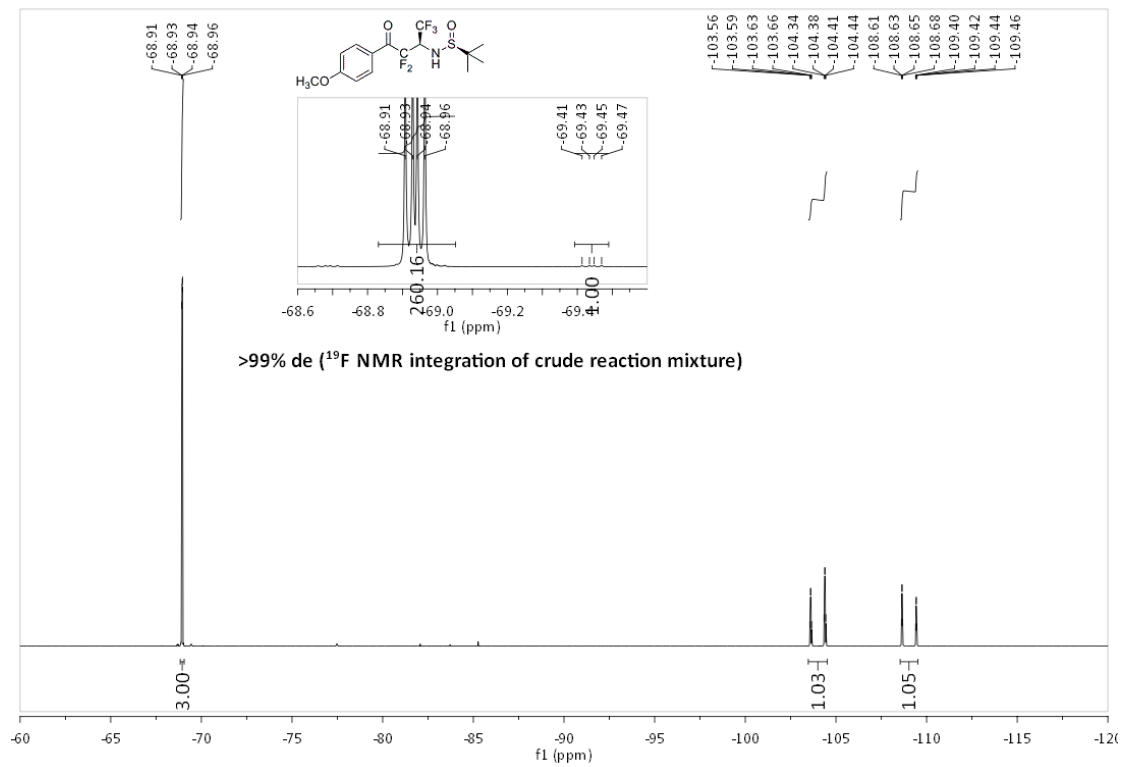

<sup>1</sup>H NMR, <sup>13</sup>C NMR and <sup>19</sup>F NMR spectra of **10j**

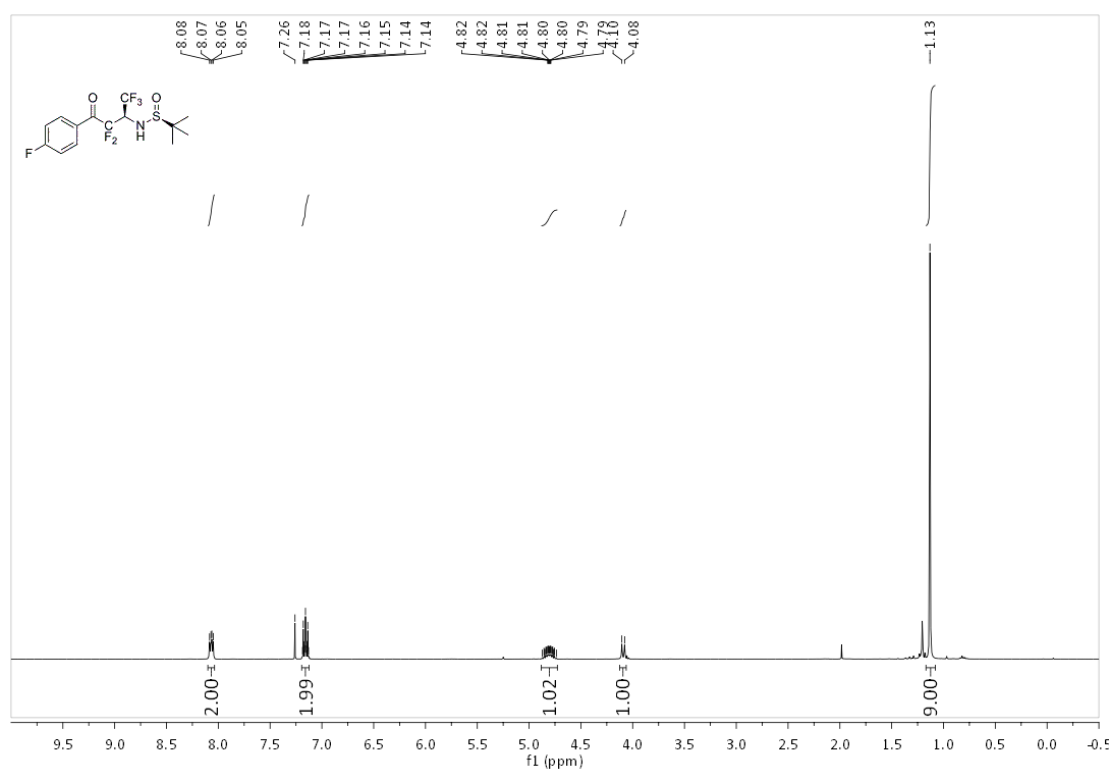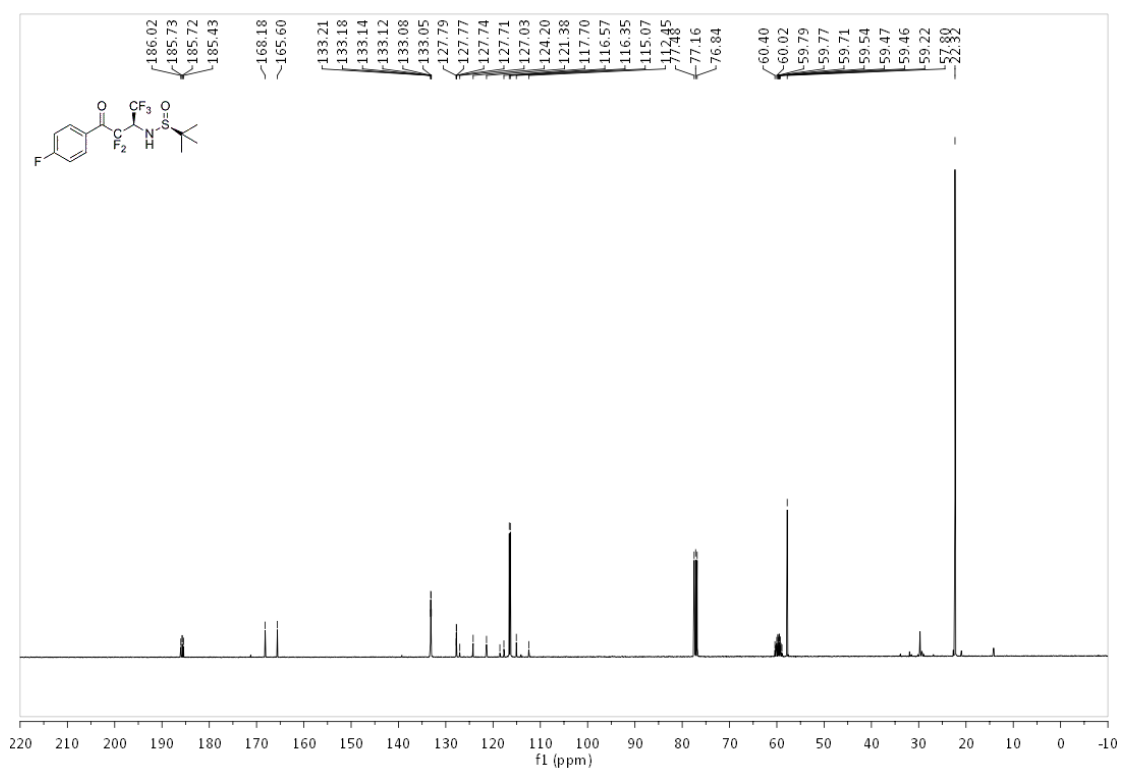

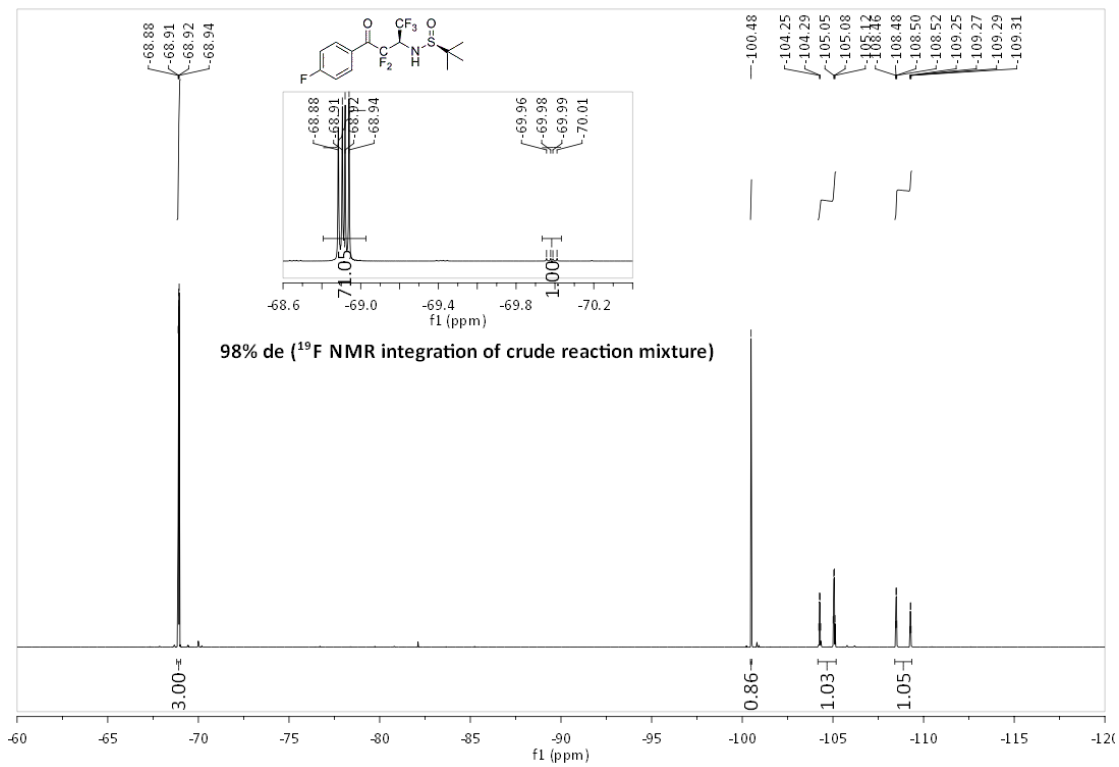

<sup>1</sup>H NMR, <sup>13</sup>C NMR and <sup>19</sup>F NMR spectra of **10k**

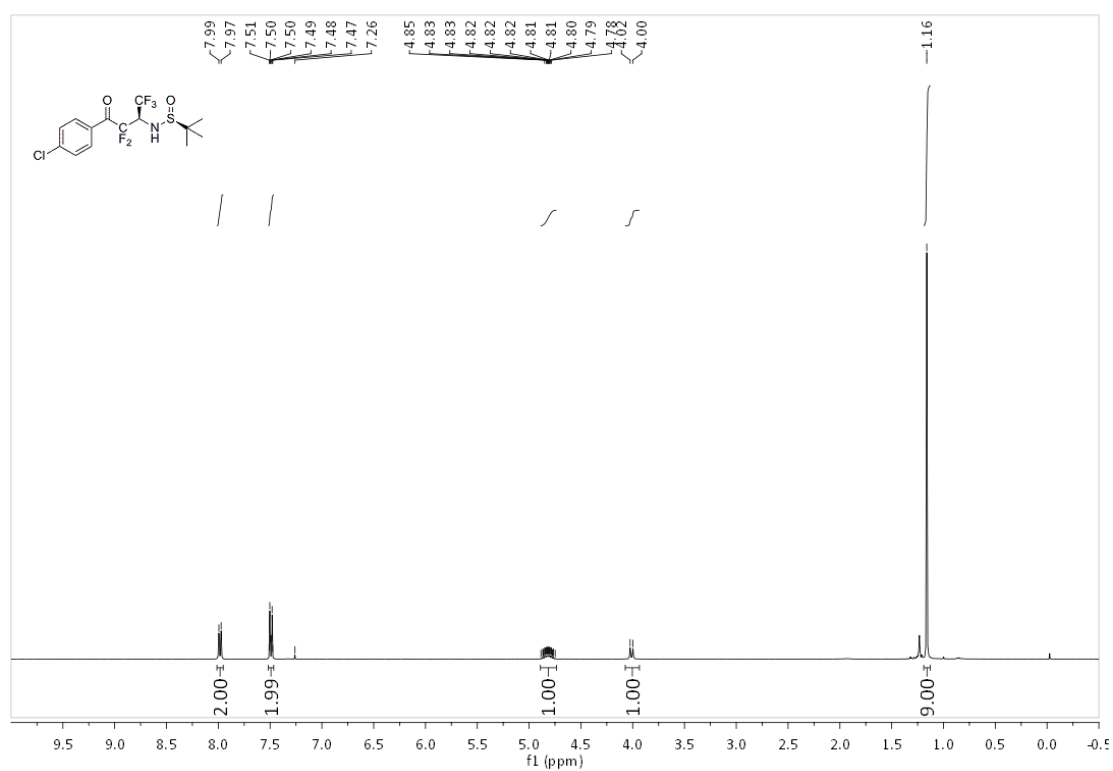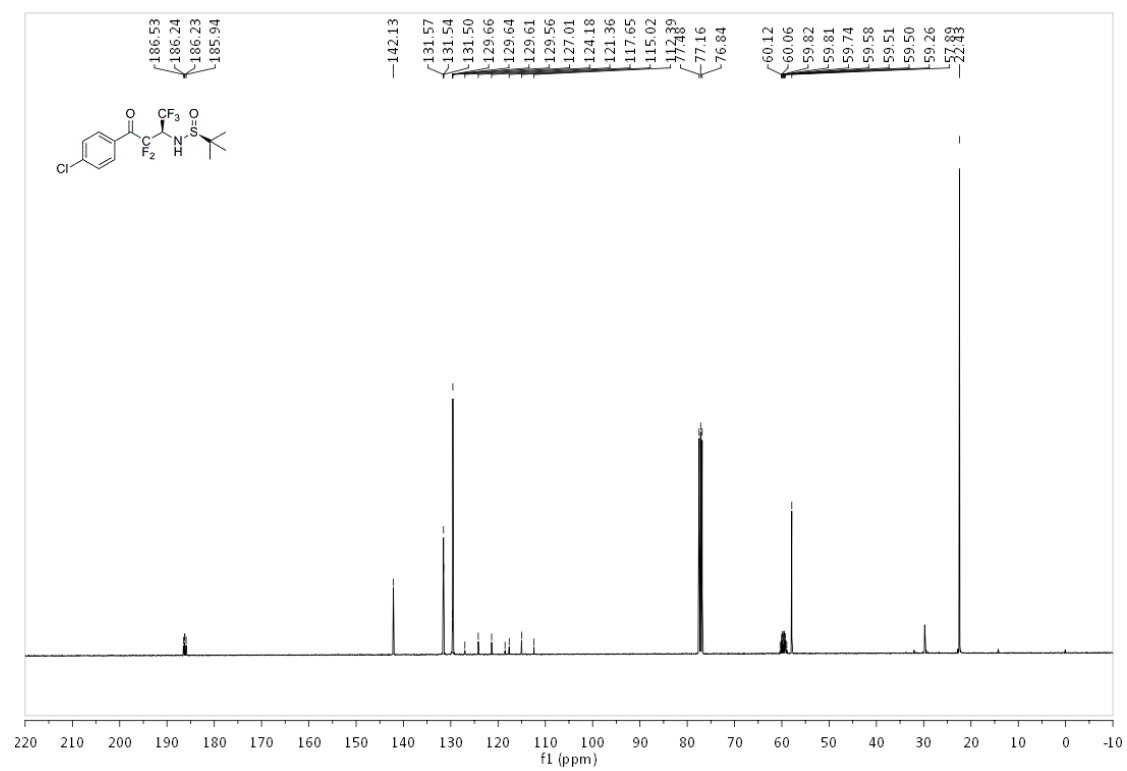



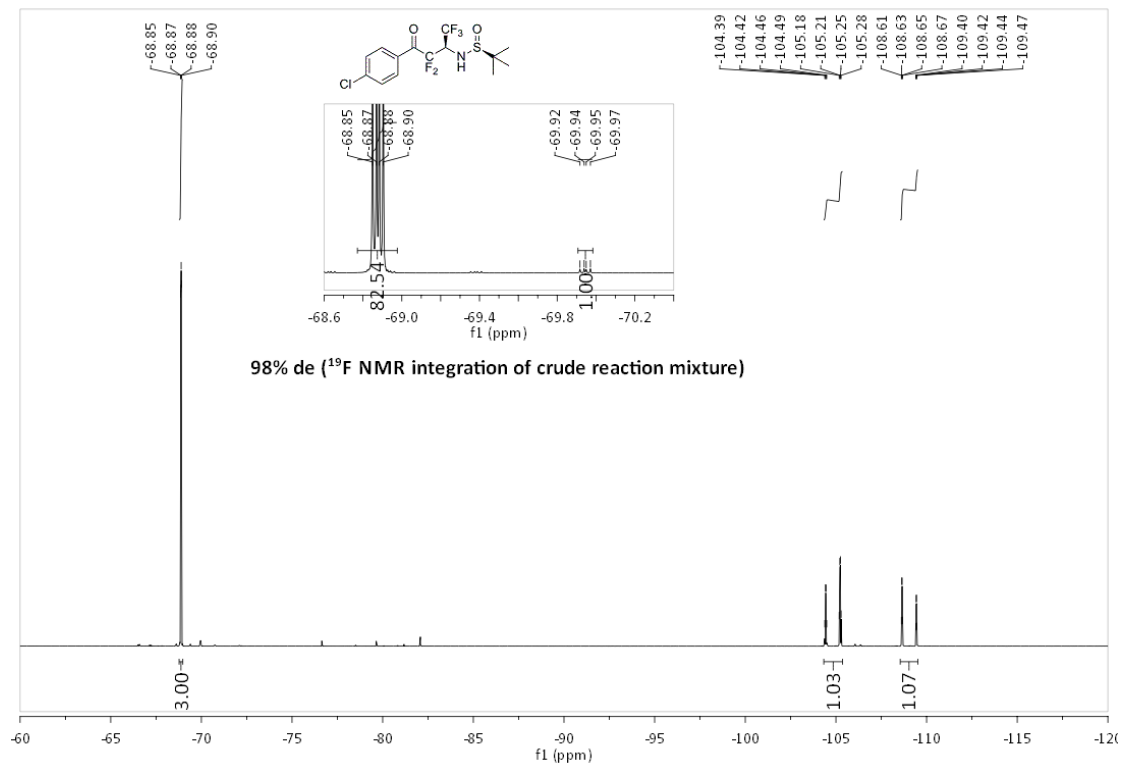

<sup>1</sup>H NMR, <sup>13</sup>C NMR and <sup>19</sup>F NMR spectra of **101**

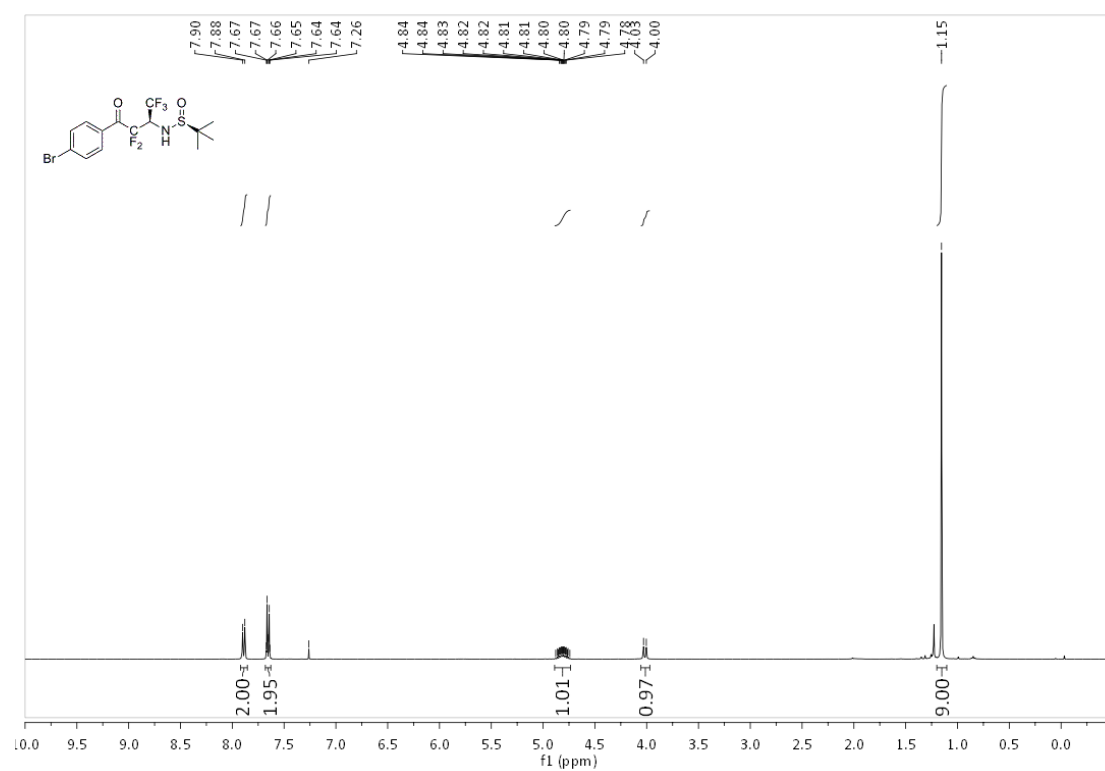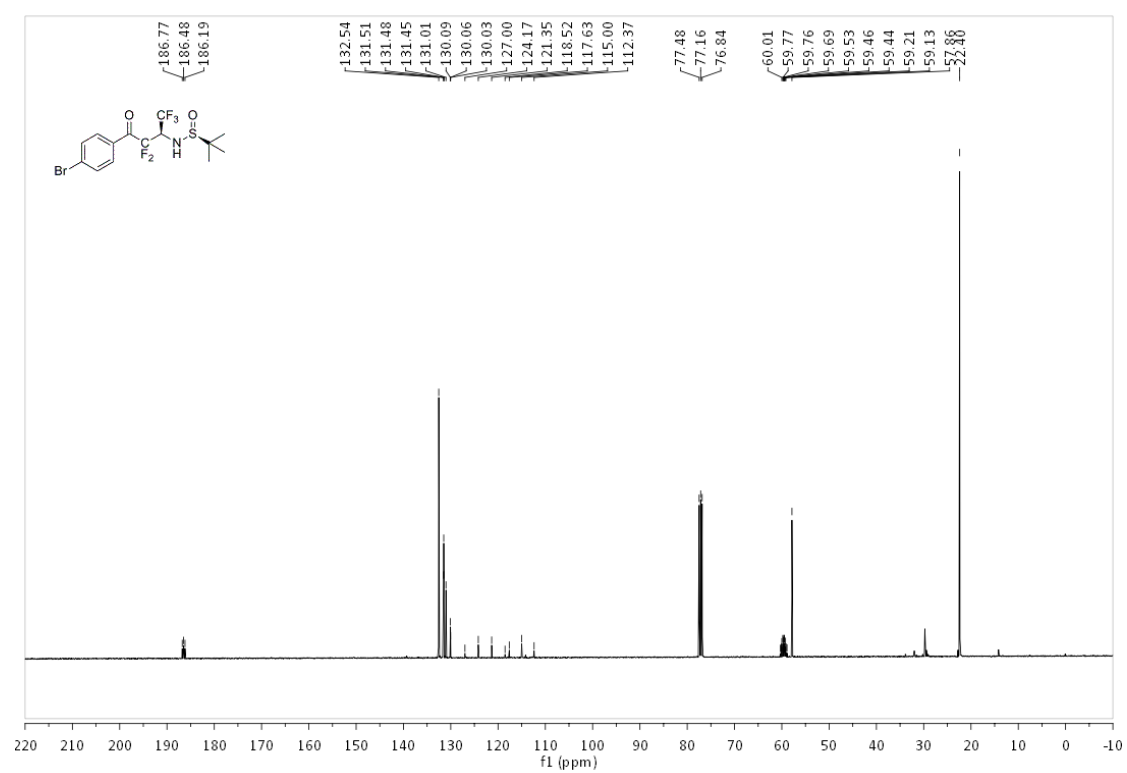

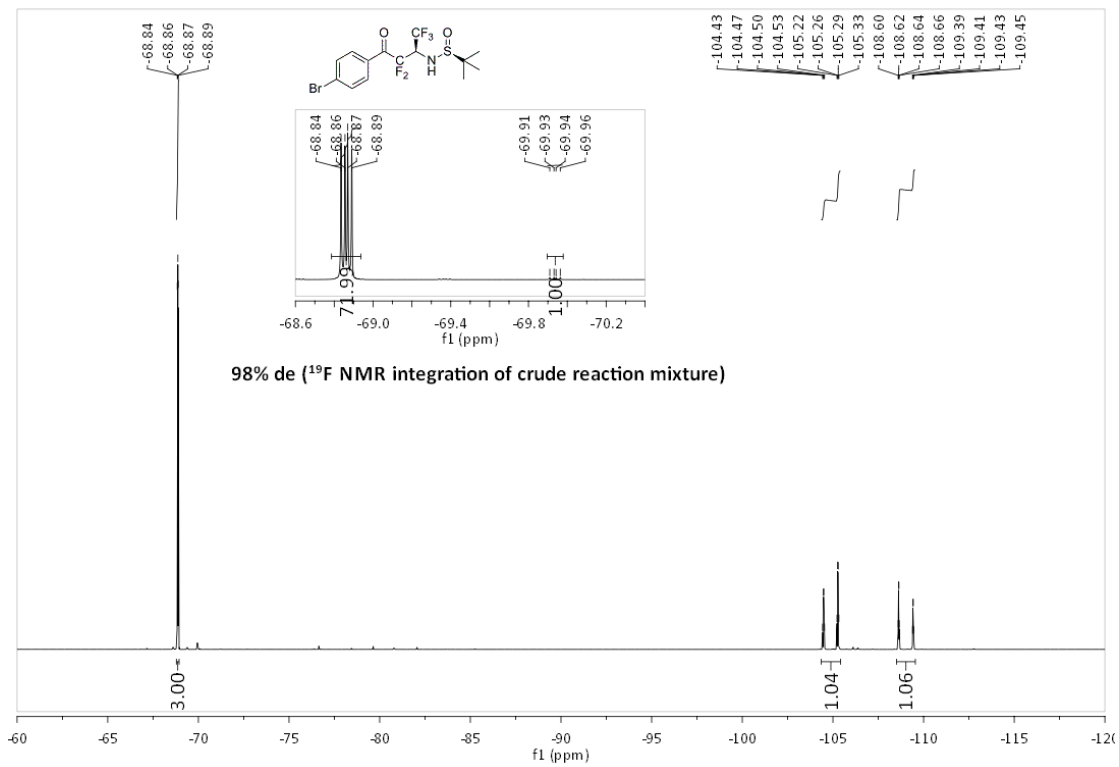

$^1\text{H}$  NMR,  $^{13}\text{C}$  NMR and  $^{19}\text{F}$  NMR spectra of **10m**

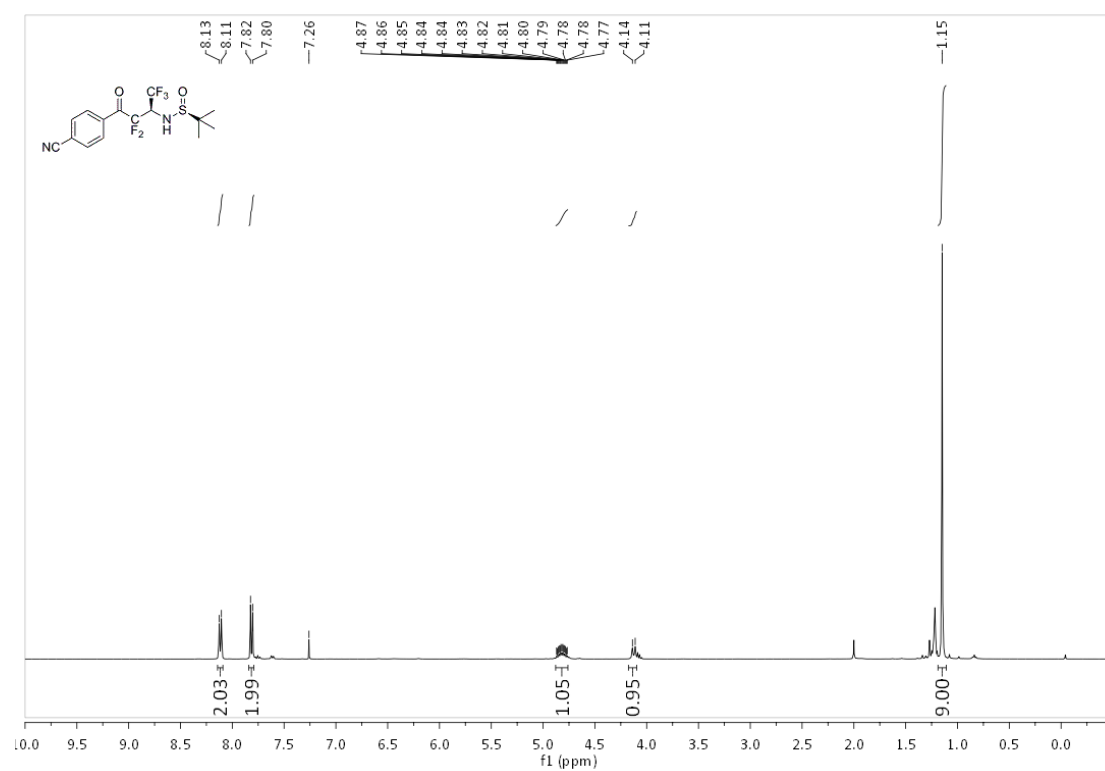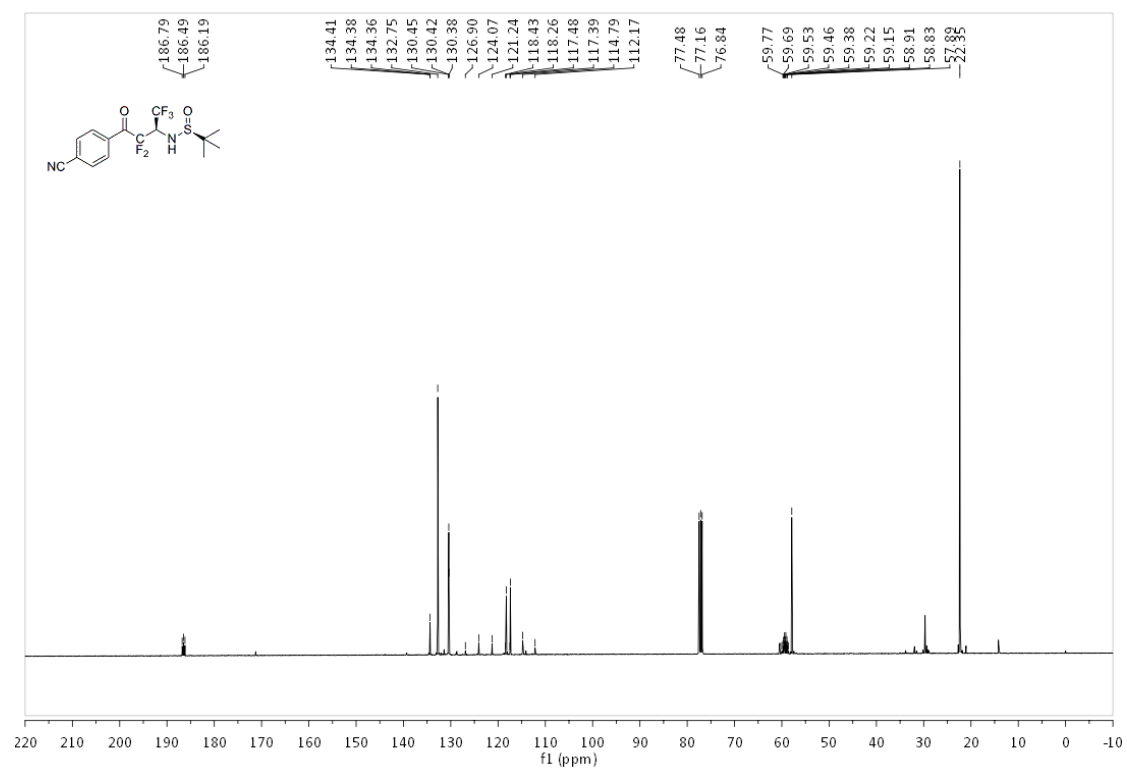

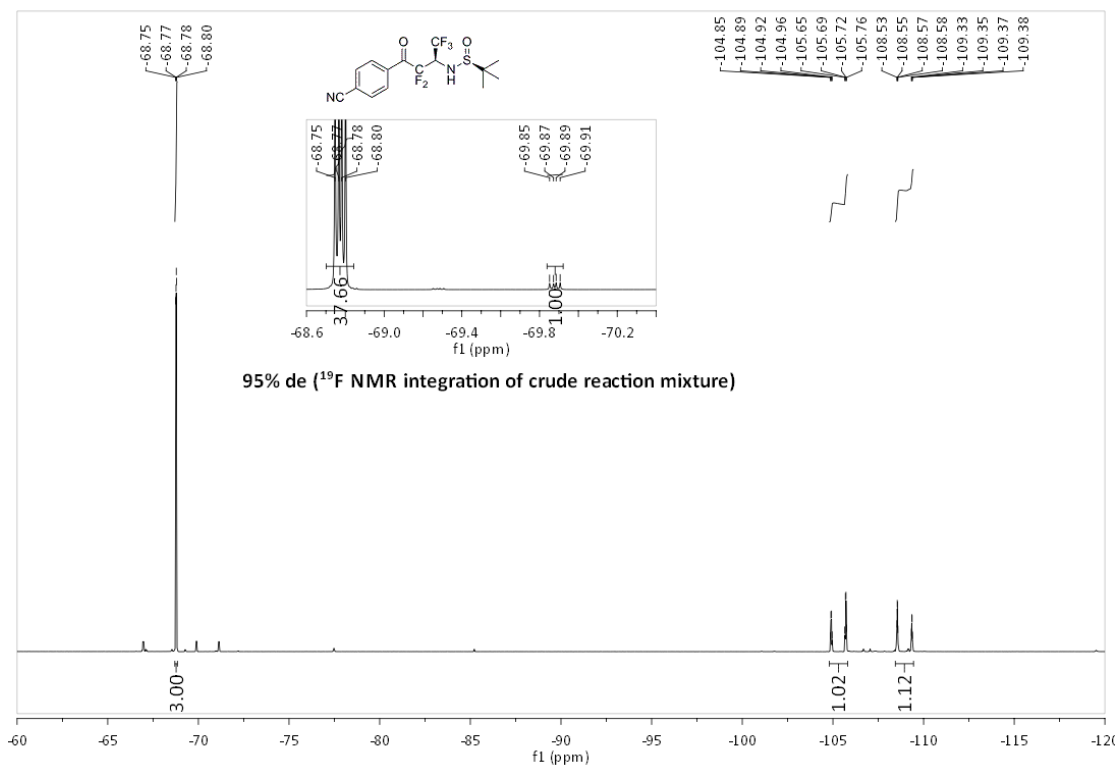

$^1\text{H}$  NMR,  $^{13}\text{C}$  NMR and  $^{19}\text{F}$  NMR spectra of **10n**

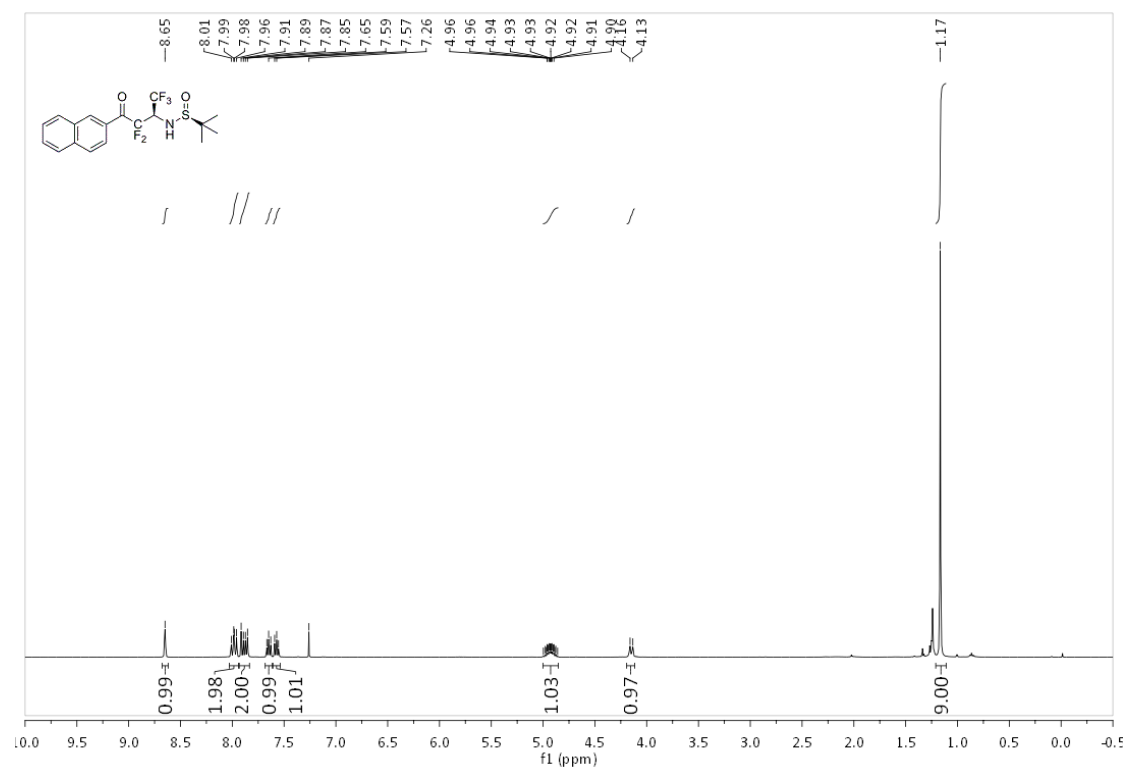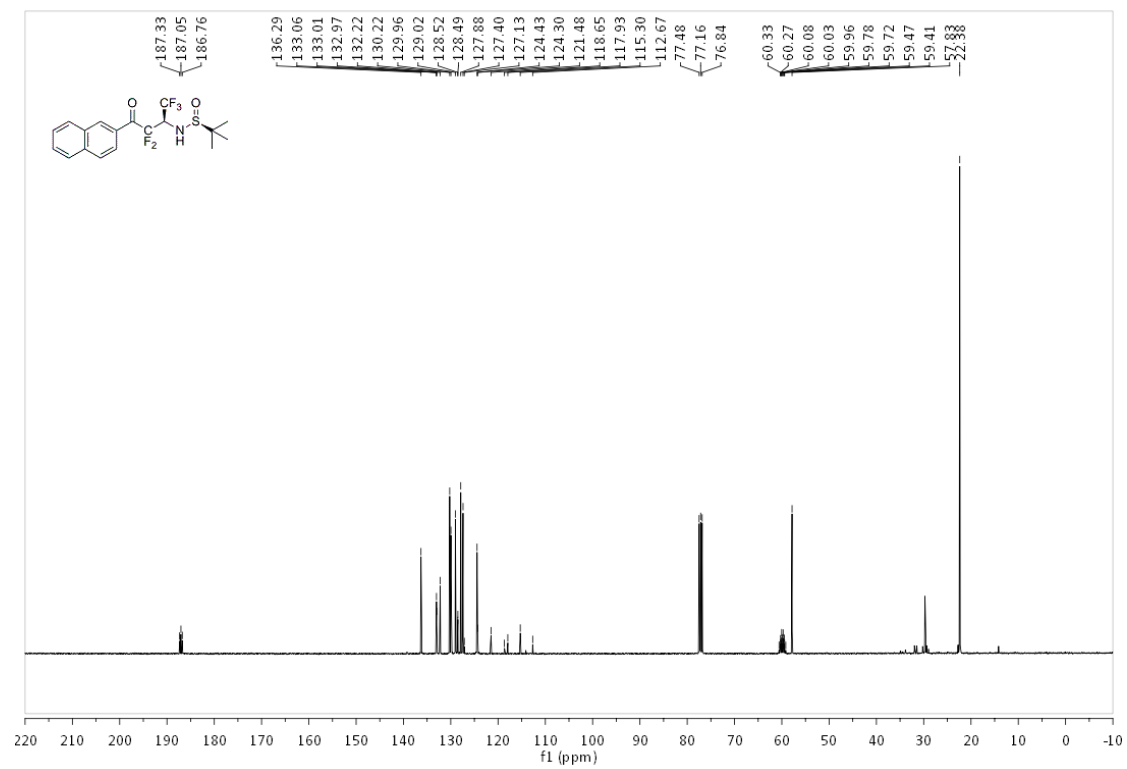

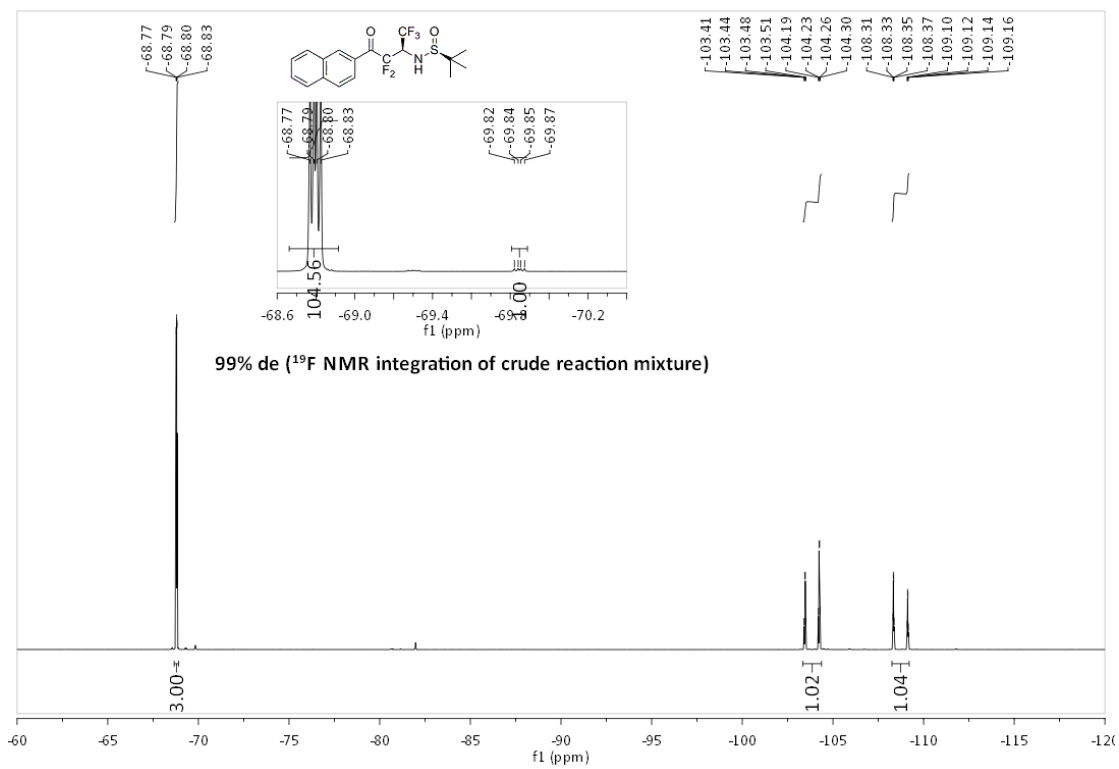

$^1\text{H}$  NMR,  $^{13}\text{C}$  NMR and  $^{19}\text{F}$  NMR spectra of **10o**

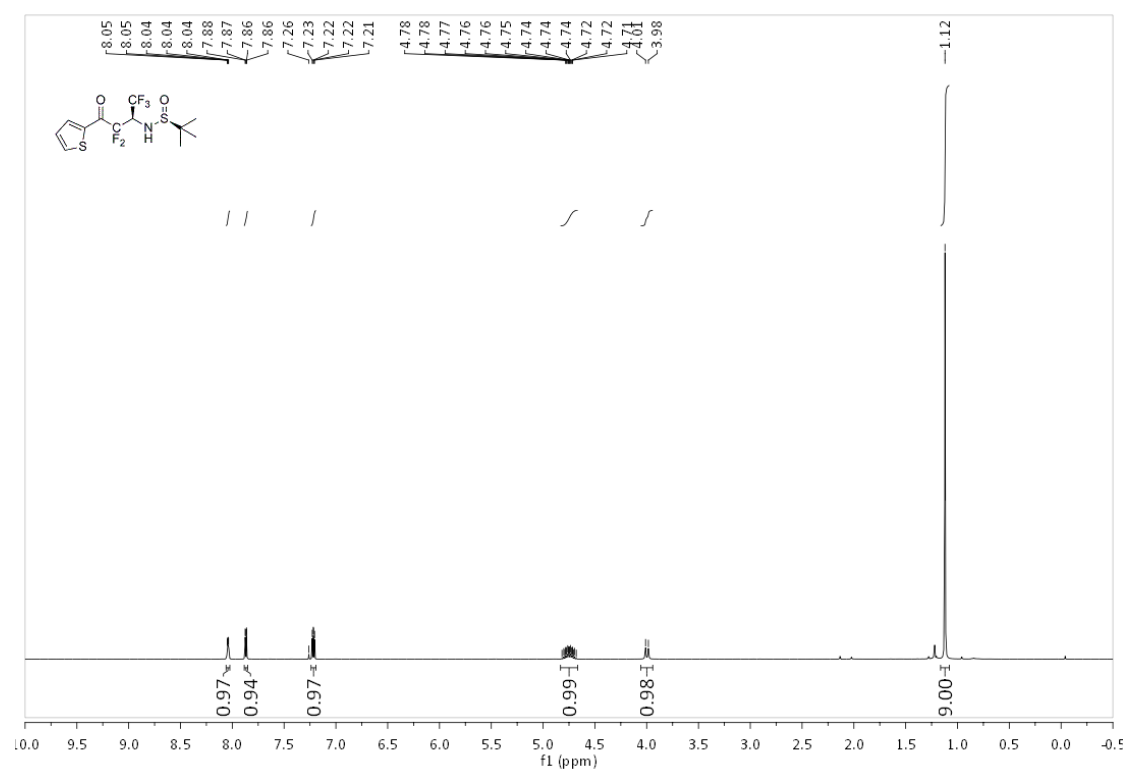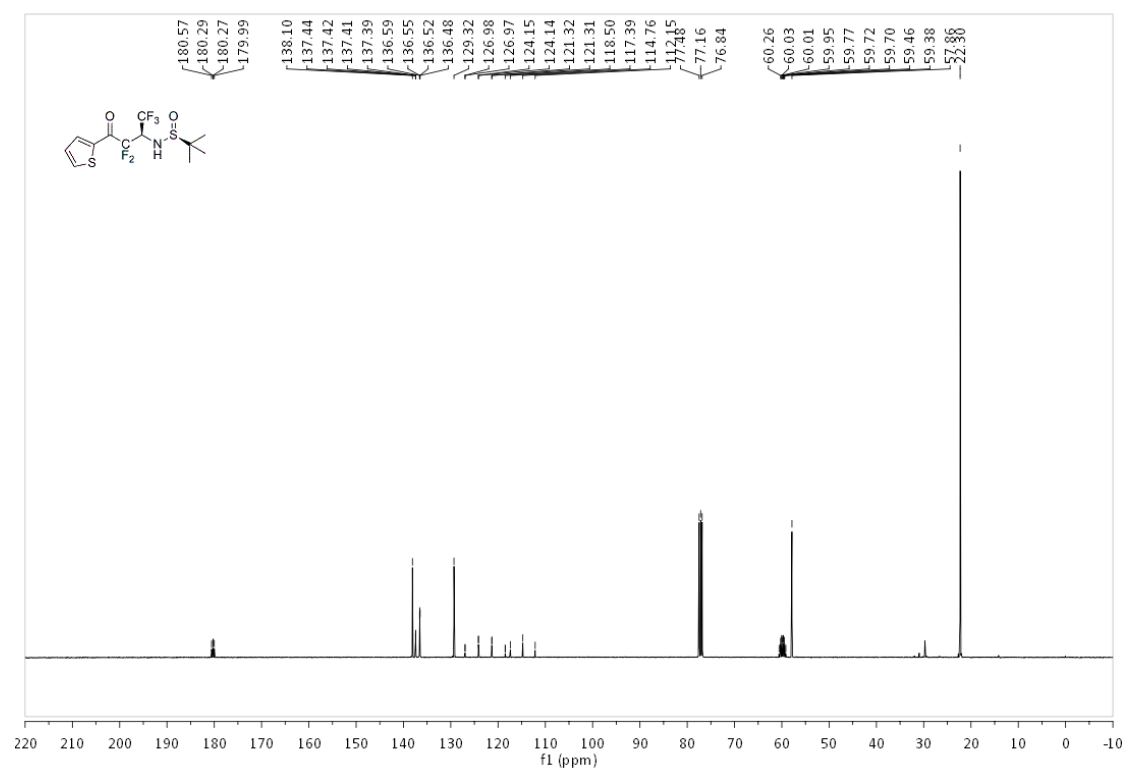



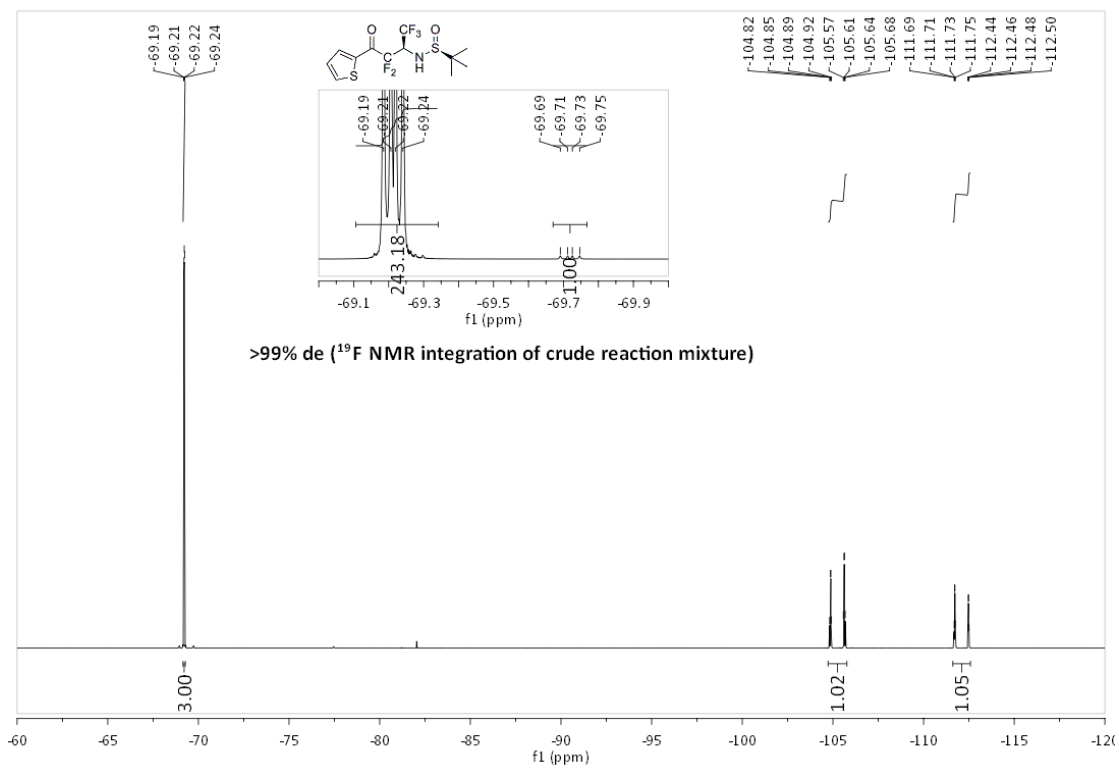

$^1\text{H}$  NMR,  $^{13}\text{C}$  NMR and  $^{19}\text{F}$  NMR spectra of **10p**

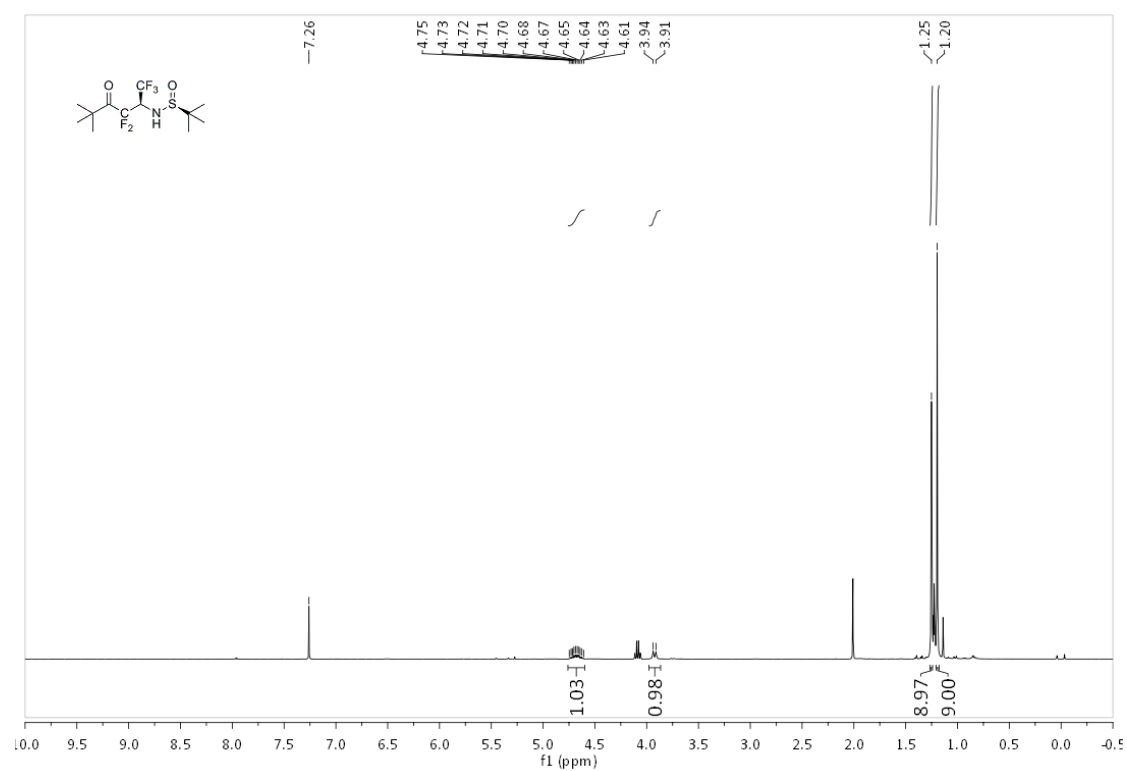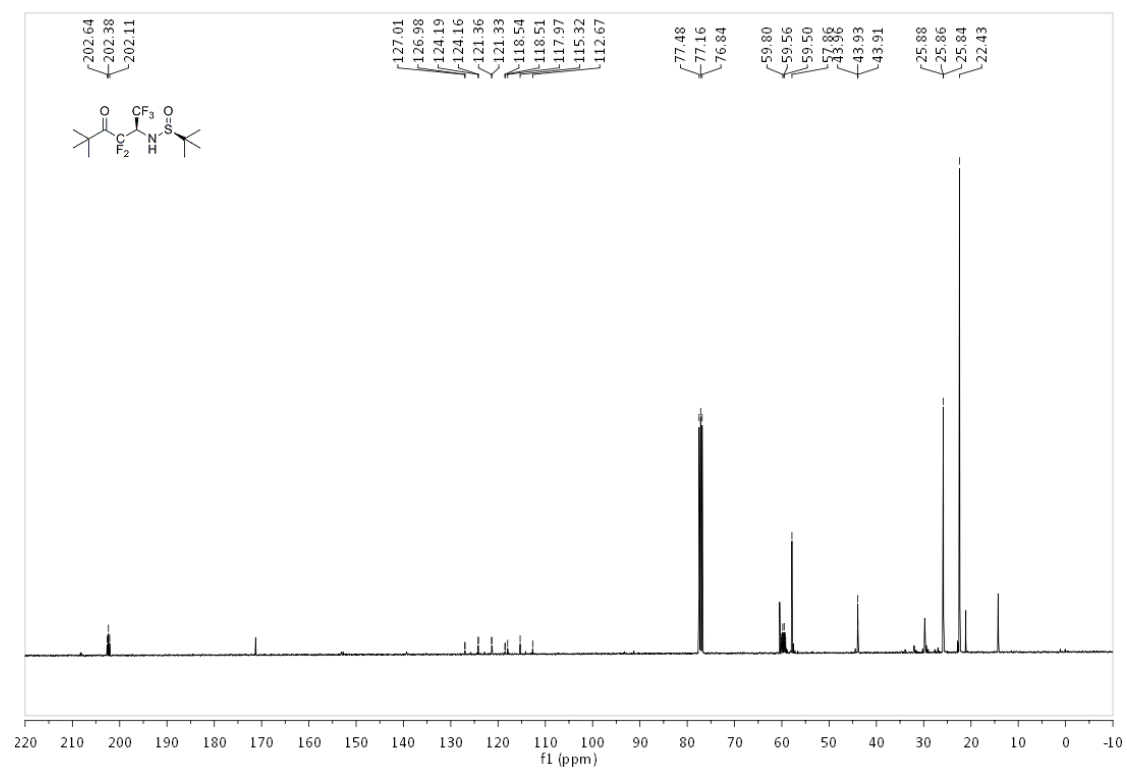

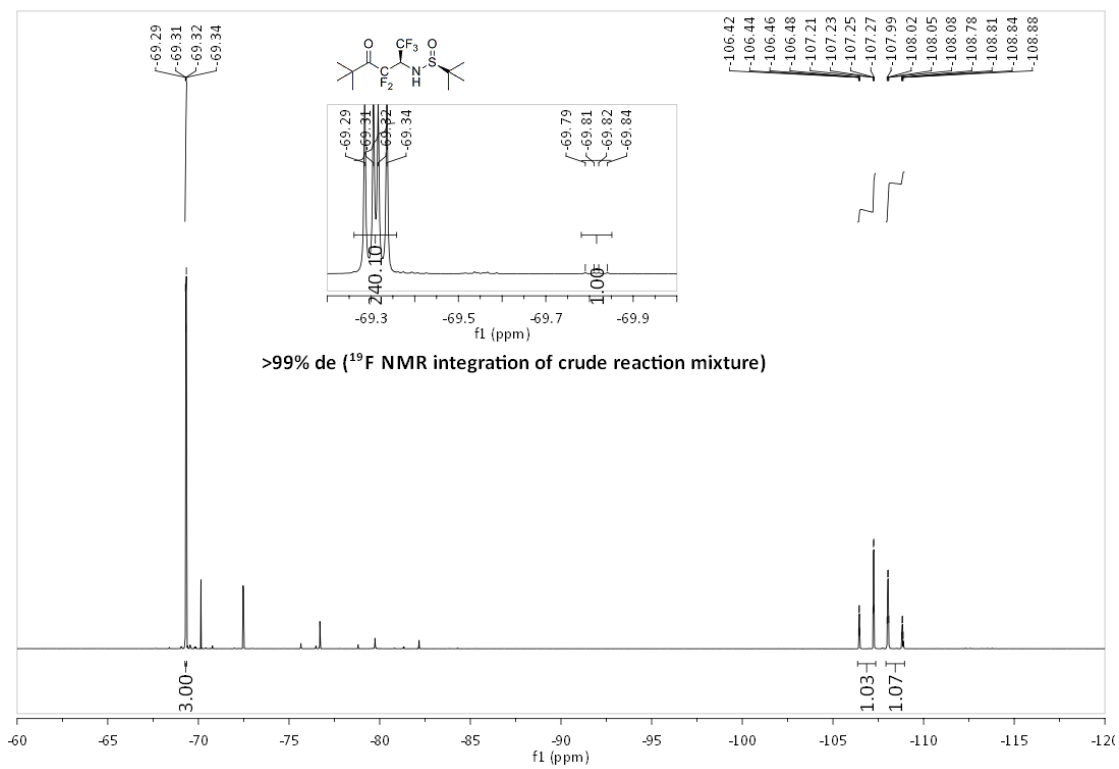

<sup>1</sup>H NMR, <sup>13</sup>C NMR and <sup>19</sup>F NMR spectra of **11**

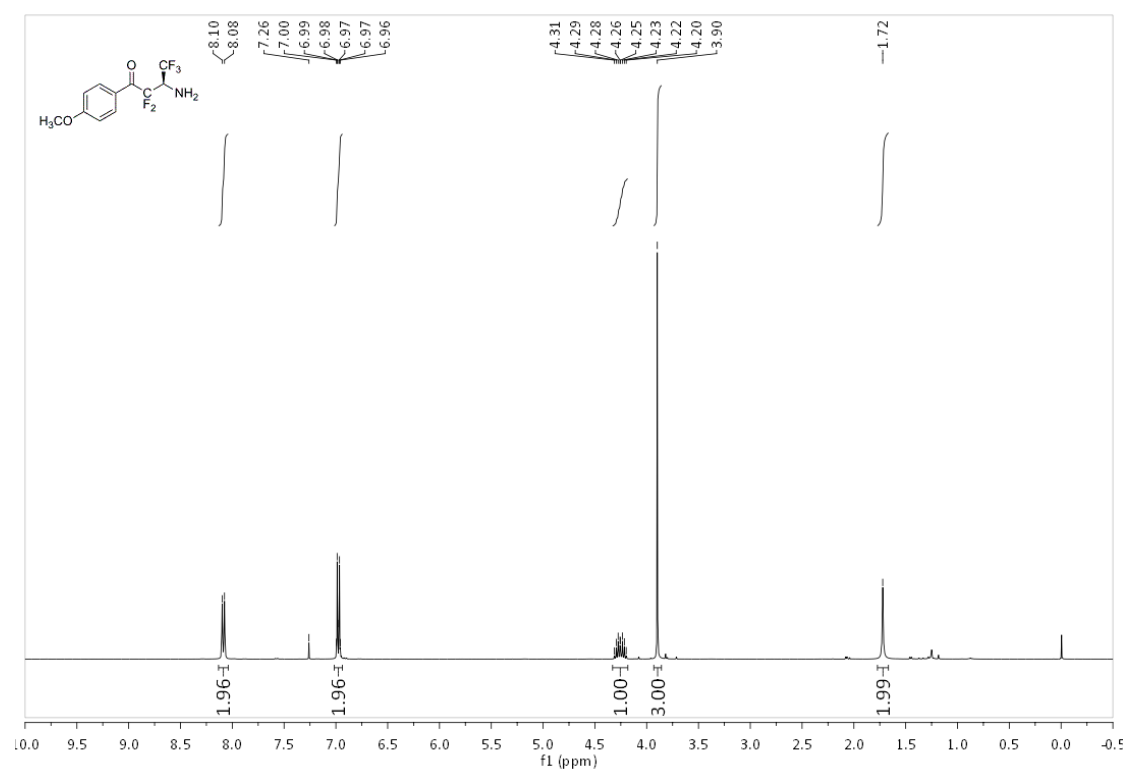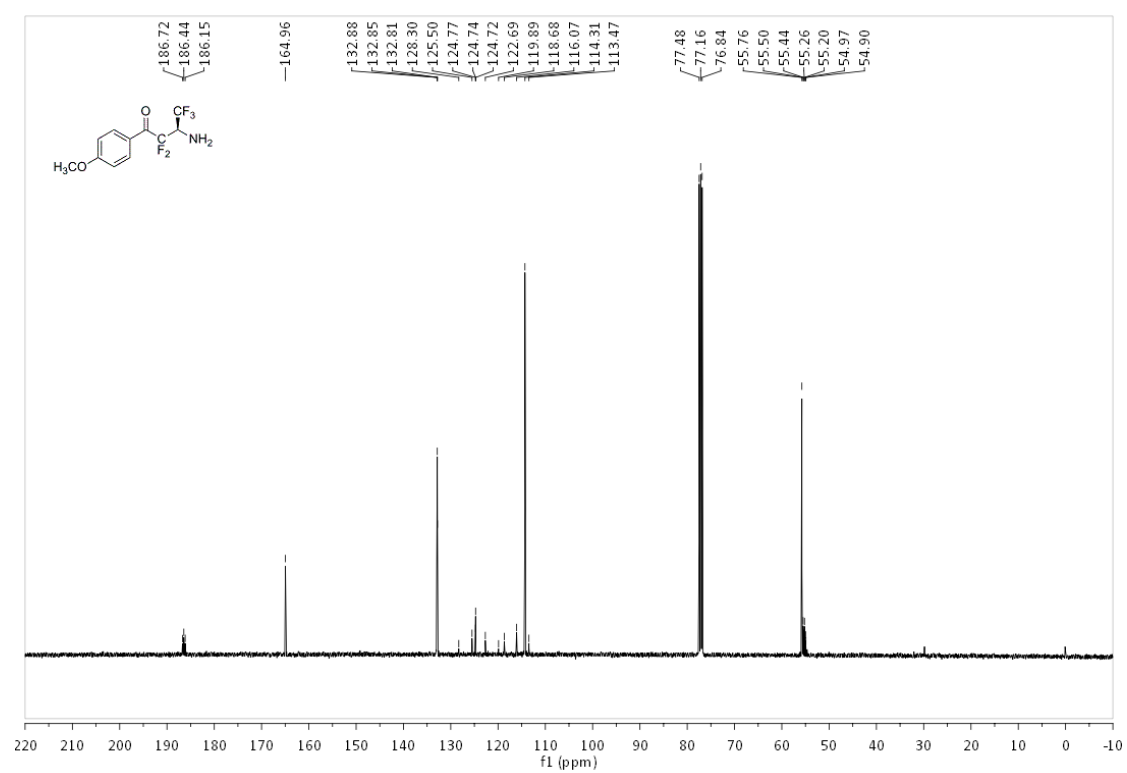

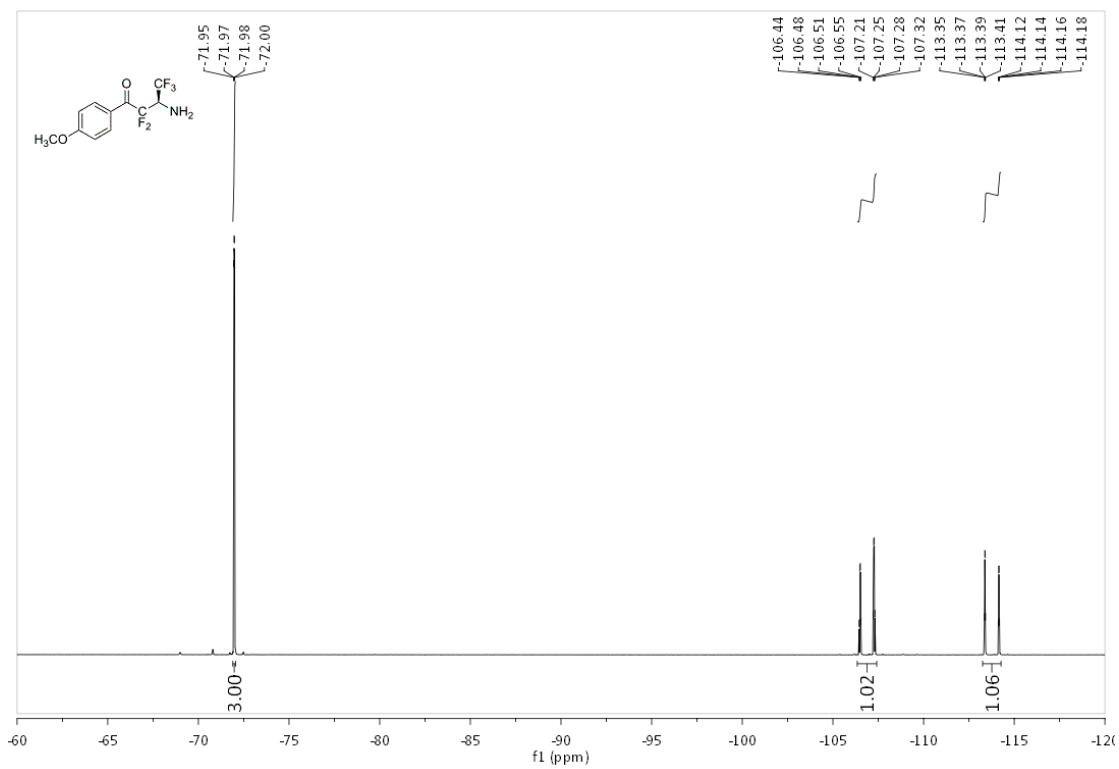

<sup>1</sup>H NMR, <sup>13</sup>C NMR and <sup>19</sup>F NMR spectra of **12**

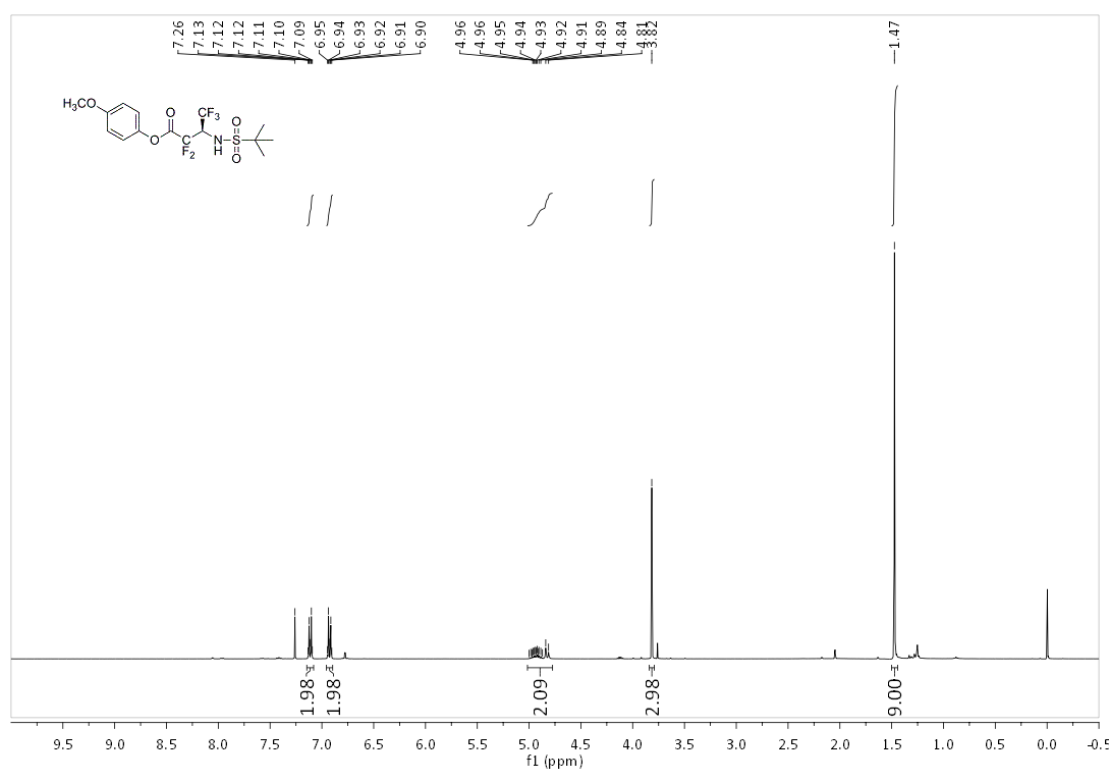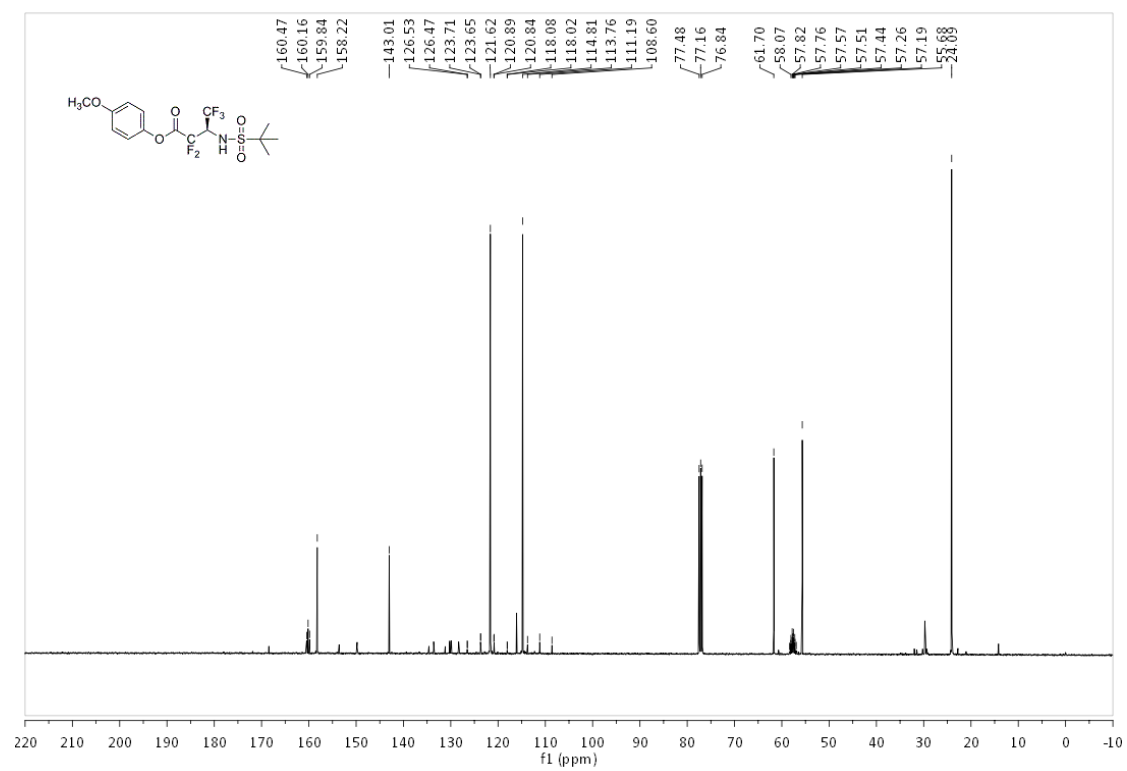

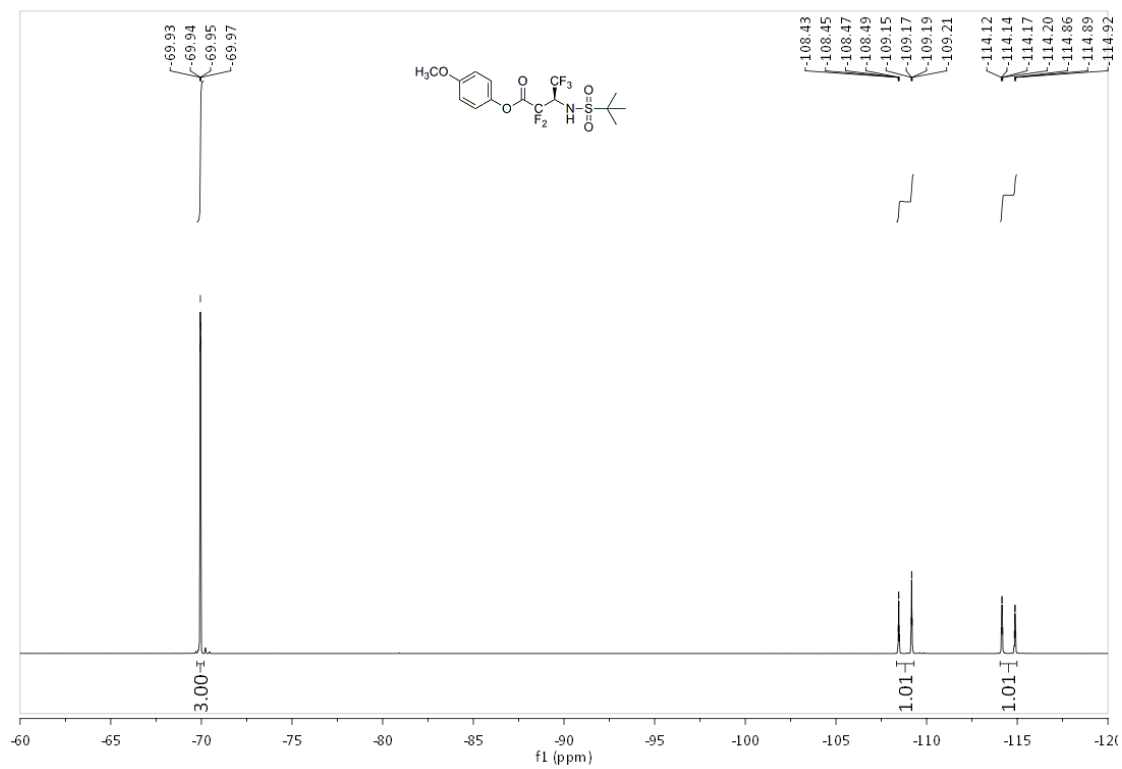

<sup>1</sup>H NMR, <sup>13</sup>C NMR and <sup>19</sup>F NMR spectrum of **13**

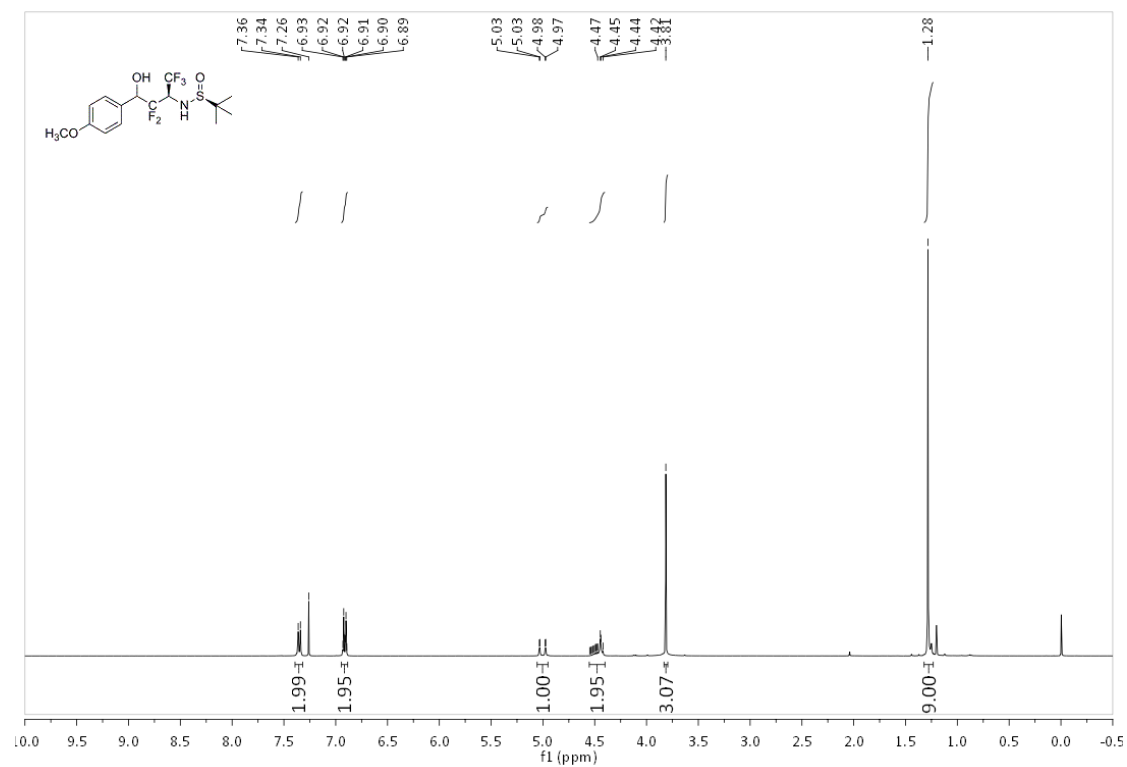

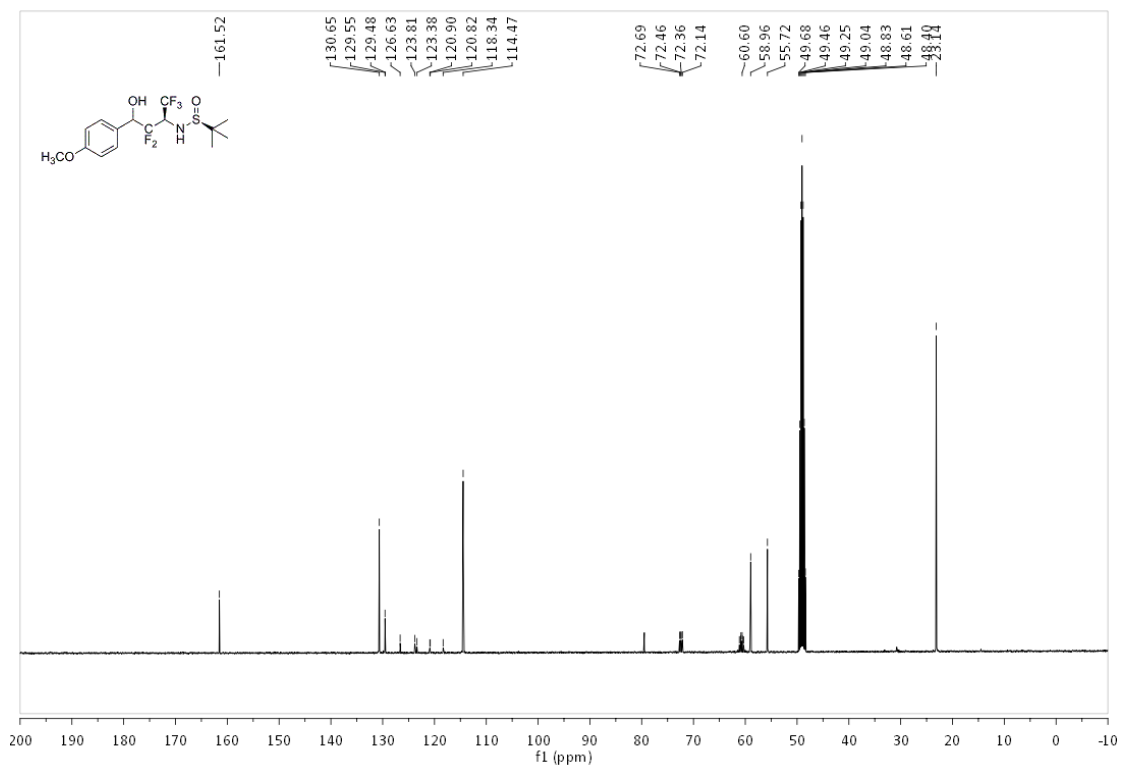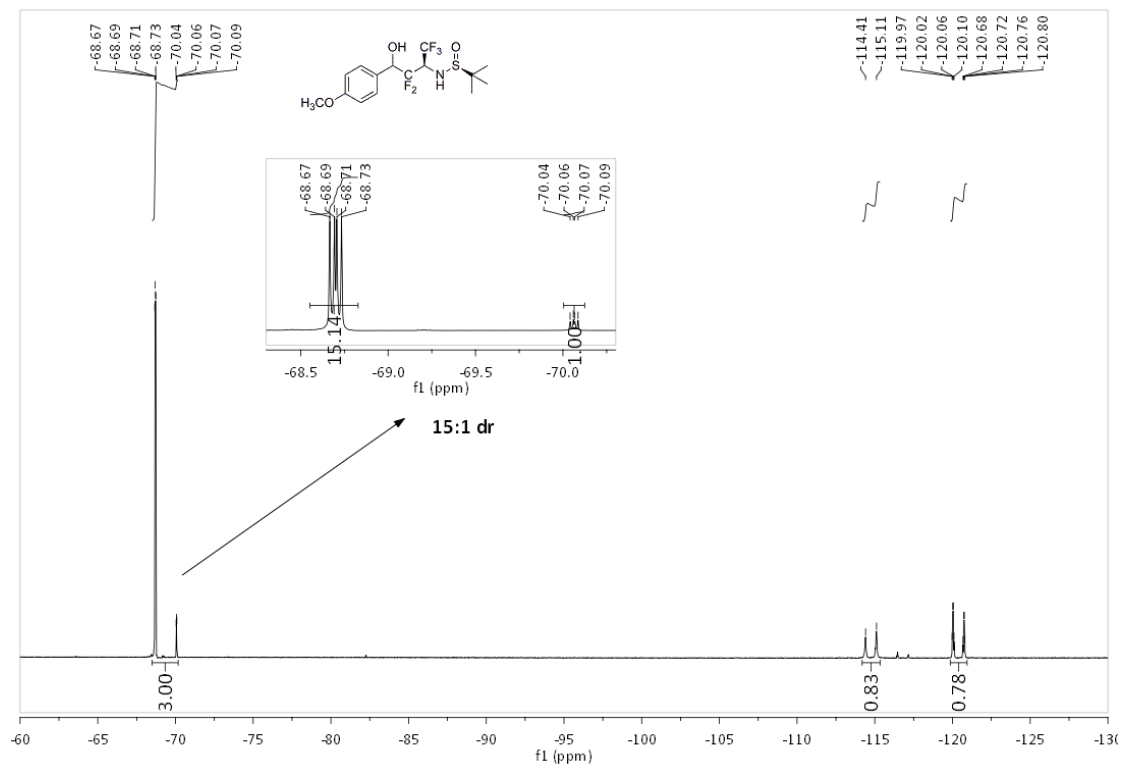



### 3. $^{19}\text{F}$ NMR spectra for the study of the configurational stability

The product (**10i**) is quite stable in  $\text{CHCl}_3$ , DMSO, Benzene and  $\text{CH}_3\text{OH}$ . ( $c = 0.01 \text{ mol/L}$ )

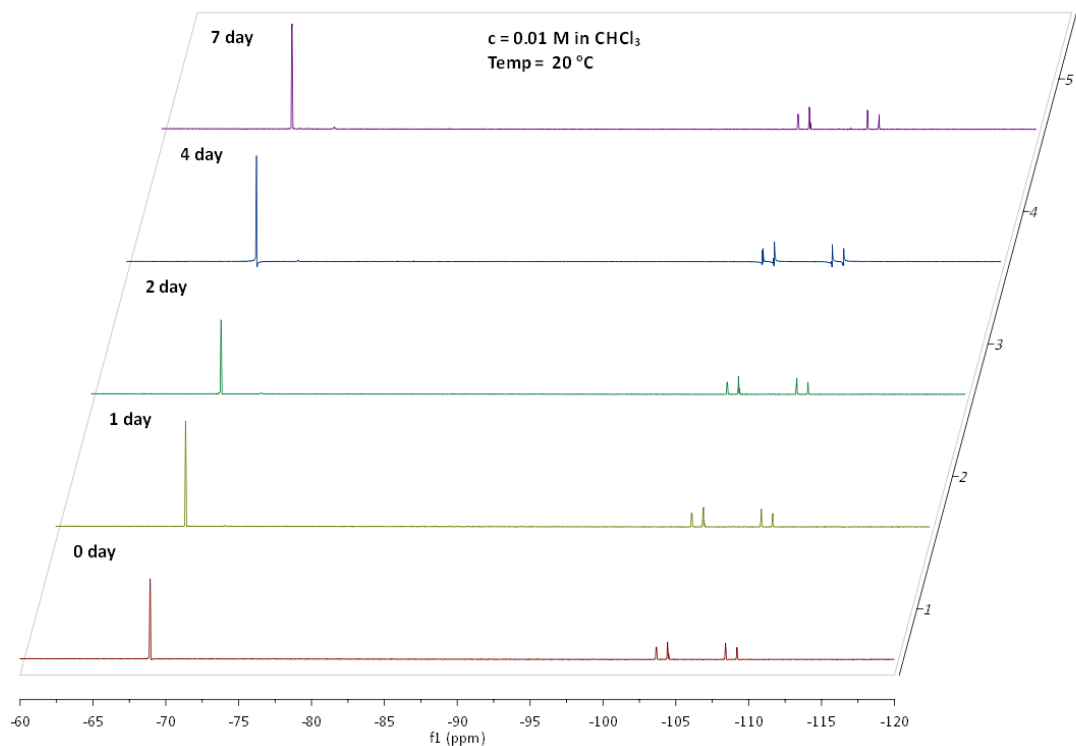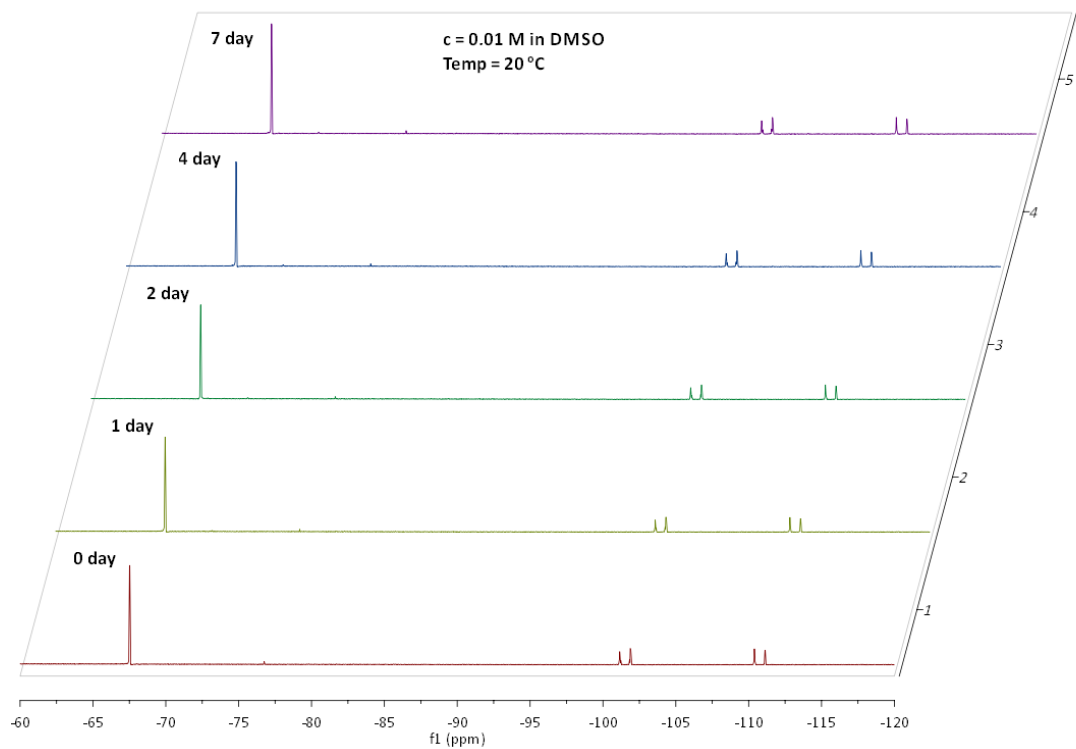

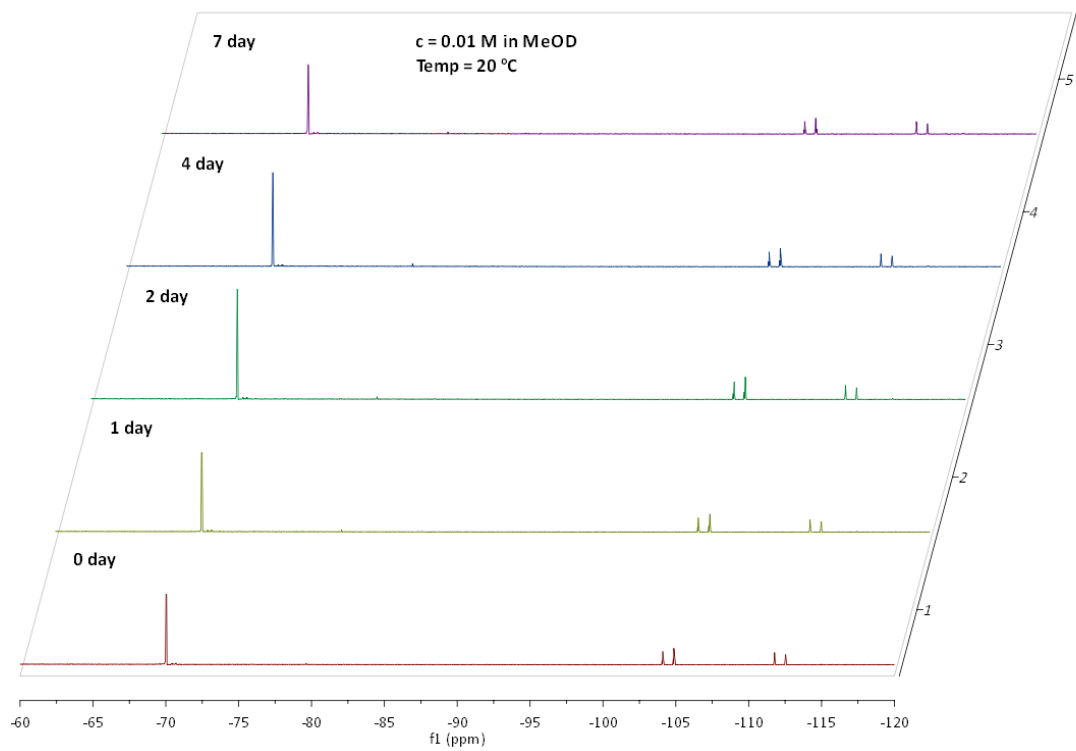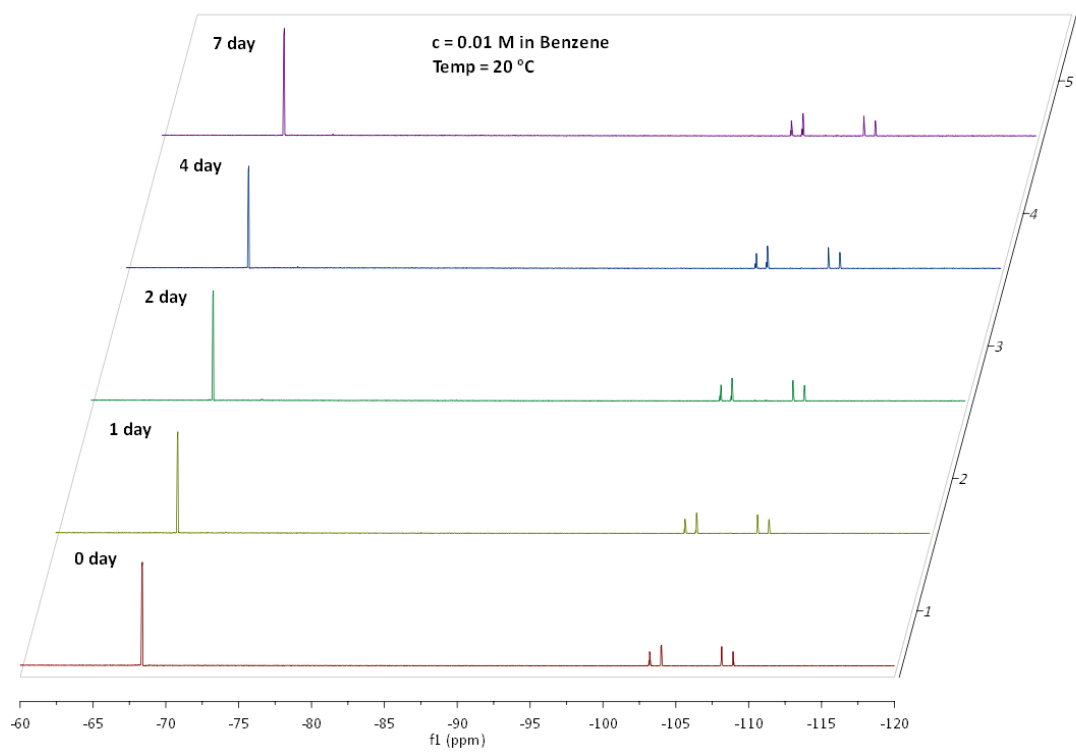

The product (**10i**) is also stable with TEA and DABCO in  $\text{CHCl}_3$ .

(c (product) = 0.01 mol/L, c (TEA or DABCO) = 1.0 mol/L)

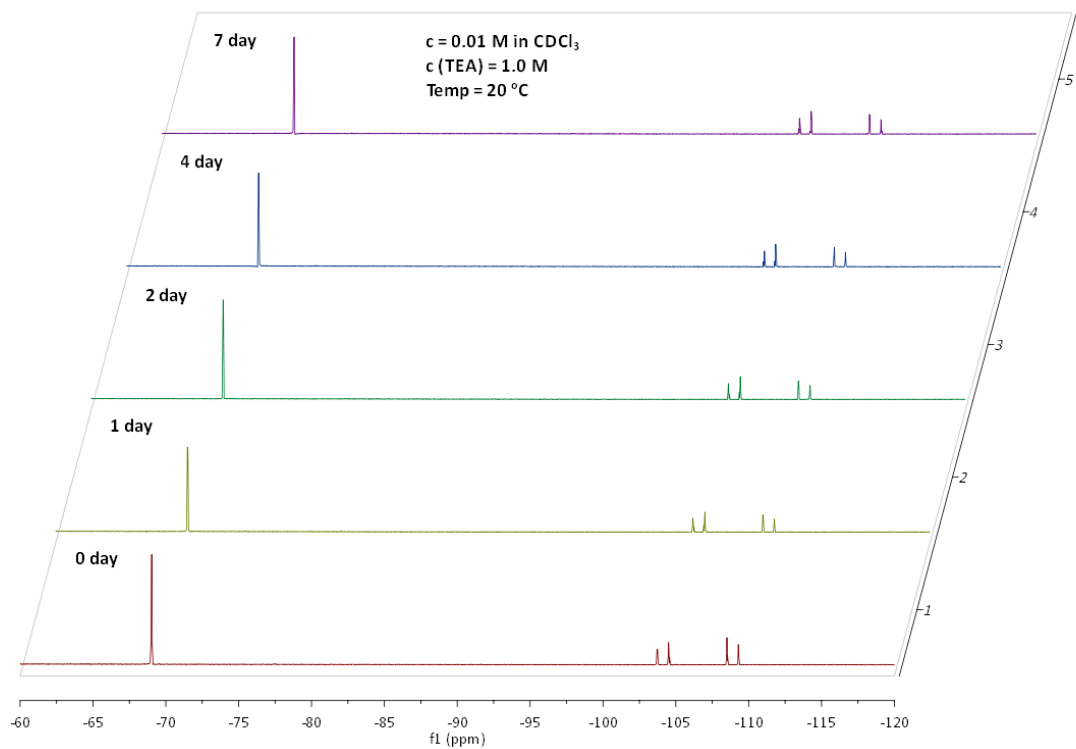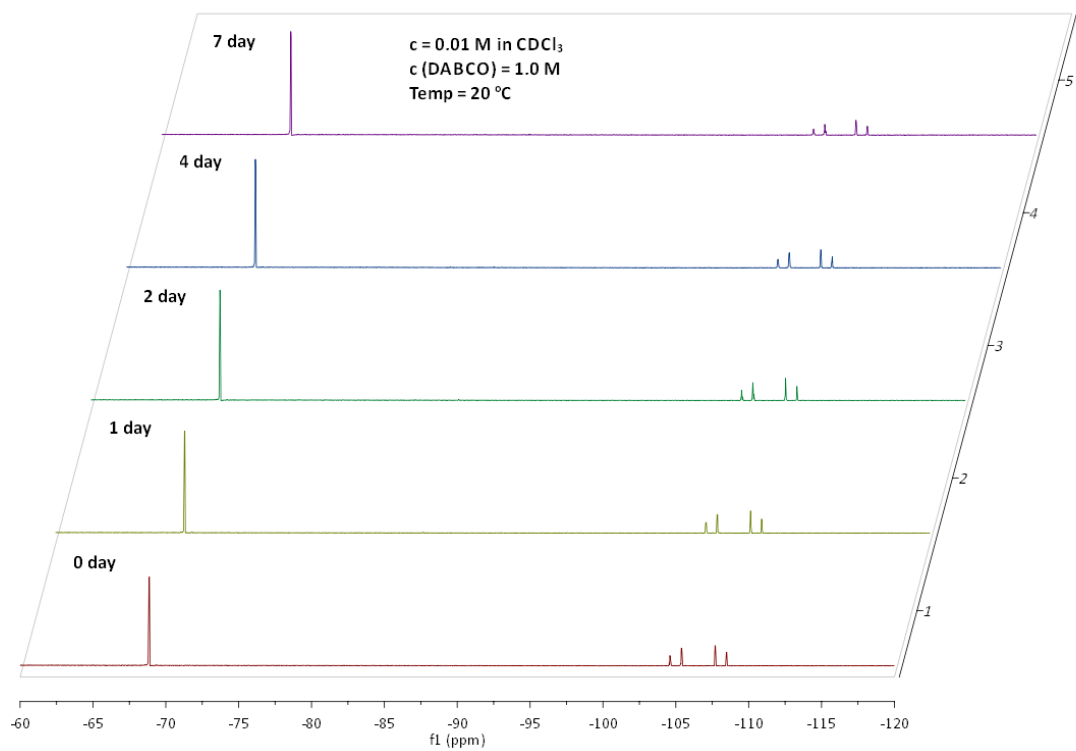

The product (**10i**) is unstable with DBU in  $\text{CHCl}_3$ , the solution turned from colorless to light yellow immediately when DBU was added, and the product changed shown by TLC.

(c (product) = 0.01 mol/L, c (DBU) = 1.0 mol/L)

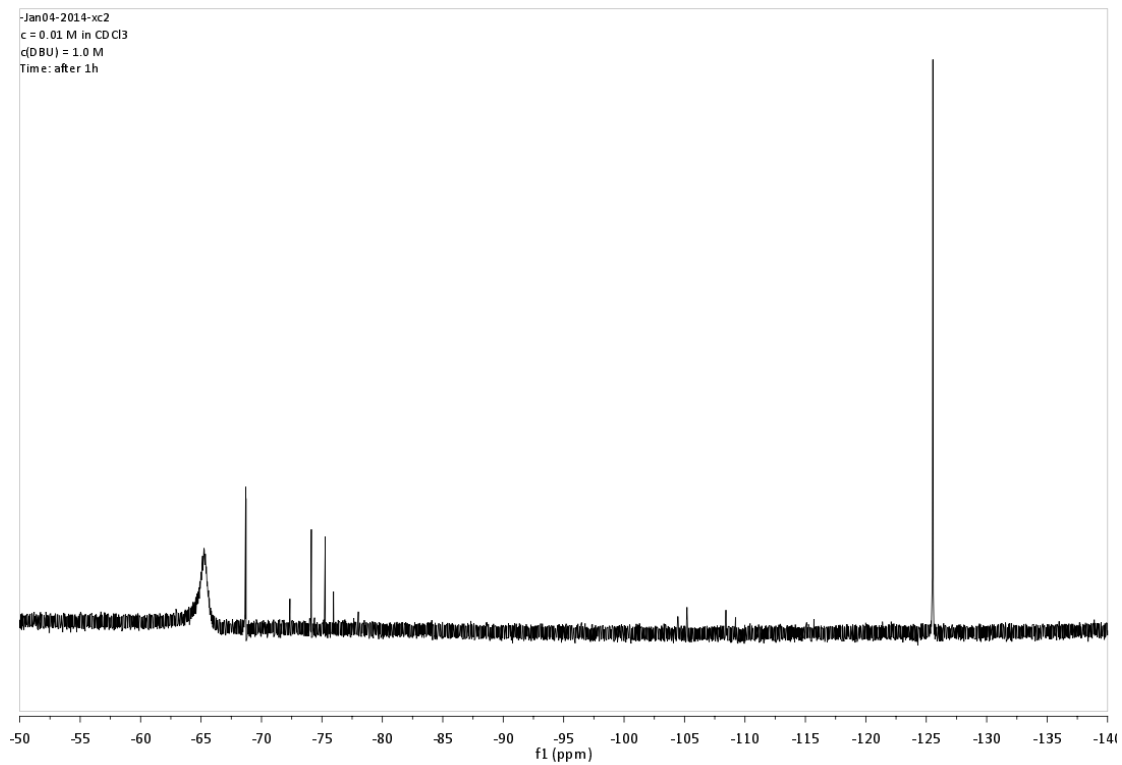

Supplement: c4ob01575d1.pdf [file c4ob01575d1.pdf]
